# Supplementary material for: Perception and self-management of hypertension in Chinese cardiologists (CCHS): a multicenter, large-scale cross-sectional study
Source: PubMed Central journal article supplement — BMJ Open. 2019 Sep 27;9(9):e029249. doi: 10.1136/bmjopen-2019-029249 (PMC6773313; doi:10.1136/bmjopen-2019-029249), 2019-09-27
Supplement: bmjopen-2019-029249.draft_revisions.pdf [file bmjopen-2019-029249.draft_revisions.pdf]

# BMJ Open

BMJ Open is committed to open peer review. As part of this commitment we make the peer review history of every article we publish publicly available.

When an article is published we post the peer reviewers' comments and the authors' responses online. We also post the versions of the paper that were used during peer review. These are the versions that the peer review comments apply to.

The versions of the paper that follow are the versions that were submitted during the peer review process. They are not the versions of record or the final published versions. They should not be cited or distributed as the published version of this manuscript.

BMJ Open is an open access journal and the full, final, typeset and author-corrected version of record of the manuscript is available on our site with no access controls, subscription charges or pay-per-view fees (<http://bmjopen.bmj.com>).

If you have any questions on BMJ Open's open peer review process please email [info.bmjopen@bmj.com](mailto:info.bmjopen@bmj.com)

# BMJ Open

## Survey of cardiovascular health and self-cognition in Chinese cardiologists (CCHS): a multicenter, large-scale cross-sectional study

|                               |                                                                                                                                                                                                                                                                                                                                                                                                                                                                                                                                                                                                                                                                                                                                                                                                                             |
|-------------------------------|-----------------------------------------------------------------------------------------------------------------------------------------------------------------------------------------------------------------------------------------------------------------------------------------------------------------------------------------------------------------------------------------------------------------------------------------------------------------------------------------------------------------------------------------------------------------------------------------------------------------------------------------------------------------------------------------------------------------------------------------------------------------------------------------------------------------------------|
| Journal:                      | <i>BMJ Open</i>                                                                                                                                                                                                                                                                                                                                                                                                                                                                                                                                                                                                                                                                                                                                                                                                             |
| Manuscript ID                 | bmjopen-2019-029249                                                                                                                                                                                                                                                                                                                                                                                                                                                                                                                                                                                                                                                                                                                                                                                                         |
| Article Type:                 | Research                                                                                                                                                                                                                                                                                                                                                                                                                                                                                                                                                                                                                                                                                                                                                                                                                    |
| Date Submitted by the Author: | 18-Jan-2019                                                                                                                                                                                                                                                                                                                                                                                                                                                                                                                                                                                                                                                                                                                                                                                                                 |
| Complete List of Authors:     | Hou, Lei ; Shanghai Institute of Cardiovascular Diseases, Zhongshan Hospital, Fudan University, Department of Cardiology; Tongren hospital, Shanghai Jiaotong University, School of Medicine, Department of Cardiology<br>Jin, Xuejuan ; Shanghai Institute of Cardiovascular Diseases, Zhongshan Hospital, Fudan University, Department of Cardiology<br>Ma, Jianying ; Shanghai Institute of Cardiovascular Diseases, Zhongshan Hospital, Fudan University, Department of Cardiology<br>Qian, Juying; Shanghai Institute of Cardiovascular Diseases, Zhongshan Hospital, Fudan University, Department of Cardiology<br>Huo, Yong ; Peking University First Hospital, Department of Cardiology<br>Ge, Junbo; Shanghai Institute of Cardiovascular Diseases, Zhongshan Hospital, Fudan University, Department of Cardiology |
| Keywords:                     | health survey, cardiovascular diseases, China, cardiologists, cross-sectional studies                                                                                                                                                                                                                                                                                                                                                                                                                                                                                                                                                                                                                                                                                                                                       |
|                               |                                                                                                                                                                                                                                                                                                                                                                                                                                                                                                                                                                                                                                                                                                                                                                                                                             |

SCHOLARONE™  
Manuscripts

1  
2  
3  
4 **Survey of cardiovascular health and self-cognition in Chinese cardiologists (CCHS): a**  
5 **multicenter, large-scale cross-sectional study**  
6  
7  
8  
9

10  
11 **Running title:** The China Cardiologist Heart Study  
12  
13

14  
15  
16 Lei Hou<sup>1,2¶</sup>, Xuejuan Jin<sup>1¶</sup>, Jianying Ma<sup>1</sup>, Juying Qian<sup>1</sup>, Yong Huo<sup>3</sup>, Junbo Ge<sup>1</sup>  
17  
18  
19

20  
21 <sup>1</sup>Department of Cardiology, Shanghai Institute of Cardiovascular Diseases, Zhongshan  
22 Hospital, Fudan University, Shanghai, China  
23

24  
25 <sup>2</sup>Department of Cardiology, Tongren hospital, Shanghai Jiaotong University, School of  
26 Medicine, Shanghai, China  
27

28  
29 <sup>3</sup>Department of Cardiology, Peking University First Hospital, Beijing, China  
30

31  
32 <sup>¶</sup>These authors contributed equally to this work.  
33  
34  
35

36  
37 **Corresponding author:** Junbo Ge, No. 180 Fenglin Road, 200032, Department of  
38 Cardiology, Shanghai Institute of Cardiovascular Diseases, Zhongshan Hospital, Fudan  
39 University, Shanghai, China. Email: gejunbo@126.com  
40  
41  
42  
43  
44  
45  
46  
47  
48  
49  
50  
51  
52  
53  
54  
55  
56  
57  
58  
59  
60

## ABSTRACT

**Objectives:** To determine the frequency of risk factors for cardiovascular diseases among Chinese cardiologists using a nationwide survey.

**Design:** Multicenter, cross-sectional observational study.

**Setting:** 2441 hospitals across China were surveyed between September 2016 and August 2017.

**Participants:** All cardiologists in-service were surveyed (n=28,924).

**Interventions:** WeChat-based electronic data capture system, a social application in China (Tencent, Nanshan, China), was used for data acquisition. Physician subscribed to the WeChat official account of the China Cardiologist Health Study, and filled out an online questionnaire that included age, gender, level of in-service hospital, professional title, academic degree, area of expertise, and cardiovascular risk factors. All information was required.

**Primary and secondary outcome measures:** The primary outcome was the presence of cardiovascular risk factors. The secondary outcome was the impact of factors on the occurrence of hypertension.

**Results:** Among 28,924 Chinese cardiologists who participated in this survey, 57.6% had blood pressure of 130-139/80-89 mmHg (5.3% were taking antihypertensive drugs) and 22.0% had blood pressure  $\geq 140/\geq 90$  mmHg (36.5% were taking antihypertensive drugs). The multivariable analysis showed that age, gender, academic degree, hospital level, body mass index (BMI), smoking, and comorbidities were independently associated with hypertension among cardiologists (all  $P < 0.05$ ). Age, female gender, BMI, smoking, family history of cardiovascular diseases, and comorbidities were independently associated with

1  
2  
3  
4 taking antihypertensive drugs among hypertensive cardiologists (all  $P < 0.05$ ). Age, hospital  
5 level, professional title, BMI, family history of cardiovascular diseases, and comorbidities  
6 were independently associated with reaching target blood pressure among hypertensive  
7 cardiologists taking antihypertensive drugs.  
8  
9  
10  
11  
12

13 **Conclusion:** Chinese cardiologists do not recognize and pay attention to their own  
14 cardiovascular health and that their work pressure is high. The identified risk factors could  
15 be used to identify cardiologists at higher risk for poor cardiovascular health and for  
16 implementing preventive interventions.  
17  
18  
19  
20  
21  
22  
23

24 **Keywords:** health survey; cardiovascular diseases; China; cardiologists; cross-sectional  
25 studies.  
26  
27  
28  
29  
30  
31

### 32 **Strengths and limitations of this study**

- 33  
34 - The strength of the present study lies in its large sample size (>26,000 participants) from  
35 all across China.  
36  
37 - Because of funding and logistics, data had to be collected using a self-filled survey, which  
38 could introduce bias compared to a formal epidemiological study.  
39  
40 - The medical system in China and the formation required to work in cardiology are  
41 different from that of other countries, limiting the generalizability of the data.  
42  
43 - The geographical distribution of the cardiologists across China was not taken into account.  
44  
45  
46  
47  
48  
49  
50  
51  
52  
53  
54  
55  
56  
57  
58  
59  
60

## INTRODUCTION

Cardiologists are exposed to threats to their health, resulting in an important incidence of orthopedic problems[1 2]. In addition, there is a risk of radiation-related diseases [2 3]. Besides those obvious occupational hazards, cardiologists are exposed to stress, work overload, and bad lifestyle habits that may increase their cardiovascular risk [4 5]. A study from Italy showed that the cardiovascular profile of Italian cardiologists was far from ideal and that the perception of their own risk factors was low [4 6]. The understanding and awareness of cardiologists' cognition of their own health care are not only important for maintaining individual health and the manpower of the national medical health care system, but also directly affect their understanding and behaviors toward the patients, eventually having some impact on the prevention and treatment of cardiovascular diseases. Indeed, cardiologists serve as role models for behavioral changes [7-9].

Chinese physicians face a large number of patients and are at risk of job turnover [10]. A survey of Chinese cardiologists found that there were only 1.9 cardiologists per 100,000 people [11], compared with 8.1 per 100,000 people in the United States in 2009 [12]. Hence, there are heavy responsibilities and work burden for cardiologists in China. Faced with such a disparity in the proportion of cardiologists and patients, the working time of Chinese doctors usually exceeds the standard working time [13]. All of those factors may lead to an increase in the incidence of cardiovascular risk factors and diseases among Chinese cardiologists. Indeed, when comparing the Physicians' Health Study from the United States with the Chinese Cardiovascular Risk Evaluation (CARE) study [14 15], it was found that the prevalence of cardiovascular risk factors among Chinese cardiologists was higher than among American physicians, and that Chinese cardiologists had a poor

1  
2  
3  
4 cognition of their own cardiovascular risk factors.  
5

6  
7 A recent anecdotic observation is that sudden death was observed in many young Chinese  
8 cardiologists, prompting the hypothesis that Chinese cardiologists may neglect their own  
9 health. Nevertheless, the factors for poor cardiovascular factors among cardiologists must  
10 first be identified and understood before interventions may be implemented. Therefore, the  
11 present study aimed to examine the risk factors for cardiovascular diseases among Chinese  
12 cardiologists using a nationwide survey.  
13  
14  
15  
16  
17  
18  
19  
20  
21

## 22 **SUBJECTS AND METHODS**

### 23 **Participants**

24  
25 This was a national, multicenter, cross-sectional observational study. Cardiologists from  
26 2441 hospitals across China were surveyed between September 2016 and August 2017. All  
27 cardiologists in-service were surveyed. If a hospital did not have a department of  
28 cardiology and only had a department of internal medicine, then the physicians engaged in  
29 the cardiovascular field in the internal medicine department were included. Physicians who  
30 were unwilling to participate in this survey were excluded. This study was approved by the  
31 Ethics Committee of Zhongshan Hospital, Fudan University. All physicians signed the  
32 informed consent form.  
33  
34  
35  
36  
37  
38  
39  
40  
41  
42  
43  
44

### 45 **Sampling method**

46  
47 Due to the funding and lack of manpower, it was difficult to design a sampling frame  
48 according to economic levels and hospital levels and randomly select hospitals nationwide.  
49 Hence, the study used a two-stage sampling process, selecting hospitals using non-random  
50 stratification according to regional economic levels and hospital levels during the first stage.  
51  
52  
53  
54  
55  
56  
57  
58  
59  
60

1  
2  
3  
4 In the second stage, a random proportional sample from authoritative lists was created, and  
5  
6 all the cardiologists in this sample of hospitals were invited to participate in the study.  
7

### 8 **Data collection**

9  
10 The study was performed and coordinated under the guidance of a scientific advisory board.

11  
12 Data quality was monitored by the study coordinators throughout the study.

13  
14 WeChat-based electronic data capture (EDC) system, a social application in China (Tencent,  
15  
16 Nanshan, China), was used for data acquisition. Physician subscribed to the WeChat  
17  
18 official account of the China Cardiologist Health Study (Wuxi Boyankang Technology  
19  
20 Development Co., Ltd. was responsible for platform construction and data management),  
21  
22 and filled out an online questionnaire that included age, gender, level of in-service hospital,  
23  
24 professional title (general physicians were those with a bachelor degree; healer were those  
25  
26 with a junior college degree or below), academic degree, area of expertise, height, body  
27  
28 weight, blood pressure, heart rate, fasting blood glucose, total cholesterol (TC), low density  
29  
30 lipoprotein-cholesterol (LDL-C), high density lipoprotein-cholesterol (HDL-C), triglyceride  
31  
32 (TG), current diseases, medication status, smoking history (at least one cigarette/day in the  
33  
34 past 3 months: yes, no, never smoking), and family history (first-degree male relative with  
35  
36 a cardiovascular disease at <55 years of age or a first-degree female relative with a  
37  
38 cardiovascular disease at <65years of age). The questions about area of expertise and  
39  
40 current diseases had multiple choices. All information was required. The questionnaire with  
41  
42 incomplete information could not be submitted. At the same time, there were logically  
43  
44 possible upper and lower limits for the content to be filled in. If the limit was exceeded, it  
45  
46 could indicate that the data was incorrect. The staff of the project team would remind the  
47  
48 physician to check. The questionnaire was shown in Appendix 1.  
49  
50  
51  
52  
53  
54  
55  
56  
57  
58  
59  
60



### **Identification of cardiovascular risk factors**

Demographic variables and risk factors for CVD were assessed according to standardized study protocols. Age was automatically generated based on the birth date. Blood pressure and heart rate were the average levels over the past 2 weeks. Fasting blood glucose and blood lipids were reviewed by the physician for the most recent results within a year. Body mass index (BMI) was calculated based on weight and height as  $\text{kg/m}^2$ . Hypertension was defined as systolic blood pressure  $\geq 140$  mmHg or diastolic blood pressure  $\geq 90$  mmHg or taking antihypertensive drugs. Reaching the target blood pressure was defined as systolic blood pressure  $< 140$  mmHg and diastolic blood pressure  $< 90$  mmHg.

### **Statistical analysis**

All data were statistically analyzed using SPSS 22.0 (IBM, Armonk, NY, USA). Continuous variables that followed the normal distribution were expressed as means  $\pm$  standard deviation (SD), and skewed continuous variables were summarized as medians (interquartile range). Categorical variables were expressed as frequencies (percentage) and chi-square tests were used for comparison between groups. Univariate and multivariate logistic regression analyses were used to analyze the factors influencing the prevalence of hypertension, rate of medicine taking, and rate of reaching the target blood pressure. For the multivariate analysis, comorbidity was defined as the presence of any other disease, or taking hypoglycemic or lipid-lowering drugs. Two-sided  $P < 0.05$  was considered as statistically significant.

### **Patient and Public Involvement statement**

Patients were not involved in the study design and implementation.

## RESULTS

### Characteristics of the participants

A total of 28,924 cardiologists across China participated in this survey. Tables 1, 2 and S1 presents their characteristics. Most (42.7%) were 30-39 years old, male (54.5%), with a bachelor degree (43.9%), working in a tertiary care hospital (60.1%), and were attending physicians (46.5%). Their main areas of expertise were: hypertension (63.9%), atherosclerosis and coronary artery diseases (51.1%), blood lipids and metabolism (35.1%), and heart failure (31.4%). Most had a BMI of 18.5-23.9 kg/m<sup>2</sup> (66.7%), fasting blood glucose <6.1 mmol/L (90.0%), LDL-C <2.60 mmol/L (44.6%), HDL-C ≥1.0 mmol/L (93.5%), TC <5.2 mmol/L (86.3%), and TG <1.7 mmol/L (53.8%). Among them, 57.6% had blood pressure of 130-139/80-89 mmHg (5.3% were taking antihypertensive drugs) and 22.0% had blood pressure ≥140/≥90 mmHg (36.5% were taking antihypertensive drugs). Among all cardiologists, 37.0% never smoked, 78.2% had a family history of cardiovascular diseases, 25.3% had hypertension, 6.1% had coronary heart disease, 2.1% had diabetes, 8.0% were taking antihypertensive drugs, 2.0% were taking hypoglycemic agents, and 4.2% were taking lipid-lowering drugs.

### Gender differences in the prevalence of CVD risk in Chinese cardiologists

Coronary heart disease, heart failure, diabetes, chronic kidney disease, peripheral vascular disease, and hypertension were all more prevalent in male cardiologists than in females (all  $P < 0.05$ ) (Table 3). More male cardiologists were taking antihypertensive drugs (33.5% vs. 28.8%,  $P < 0.001$ ), but more female cardiologists were reaching the target blood pressure (44.3% vs. 39.8%,  $P = 0.04$ ).

### Age differences in the prevalence of CVD risk in Chinese cardiologists

1  
2  
3  
4 Table 4 shows that coronary heart disease, diabetes, stroke/transient ischemic attack,  
5  
6 chronic kidney disease, peripheral vascular disease, and hypertension were all more  
7  
8 prevalent in the older age groups (all  $P<0.001$ ). The highest proportions of cardiologists  
9  
10 taking antihypertensive drugs were in the 50-59 (42.0%) and 60-69 (48.8%) years of age  
11  
12 groups. The highest proportions of cardiologists reaching the target blood pressure were in  
13  
14 the 20-29 (48.4%), 30-39 (43.6%), and 40-49 (41.7%) years of age groups. Supplementary  
15  
16 Tables S3 and S4 show that similar patterns were observed when the analyses were  
17  
18 performed by gender.  
19  
20  
21

### 22 **Hospital level differences in the prevalence of CVD risk in Chinese cardiologists**

23  
24 Table 5 shows that the prevalence of hypertension was higher in primary hospitals (35.7%)  
25  
26 compared with secondary (24.9%) and tertiary (25.4%) hospitals ( $P<0.001$ ). The rates of  
27  
28 taking antihypertensive drugs and reaching the target blood pressures were higher in  
29  
30 secondary and tertiary hospitals (both  $P<0.05$ ). Similar patterns could be observed when  
31  
32 analyzing males and females cardiologists (Supplementary Tables S5 and S6).  
33  
34  
35

### 36 **Professional title differences in the prevalence of CVD risk in Chinese cardiologists**

37  
38 Coronary heart disease was more prevalent in residents, associated chief physicians, and  
39  
40 chief physicians ( $P<0.001$ ); heart failure was more prevalent in healers and residents  
41  
42 ( $P=0.001$ ); diabetes was more prevalent in chief physicians, associate chief physicians,  
43  
44 residents, and healers ( $P<0.001$ ); stroke/transient ischemic attack was more prevalent in  
45  
46 residents and healers ( $P=0.01$ ); chronic kidney disease was more prevalent in healers and  
47  
48 residents ( $P<0.001$ ); and peripheral vascular disease was more prevalent in residents  
49  
50 ( $P<0.001$ ). Hypertension was more prevalent in associate chief physicians and chief  
51  
52 physicians ( $P<0.001$ ), with a correspondingly higher prevalence of taking antihypertensive  
53  
54  
55  
56  
57  
58  
59  
60

1  
2  
3  
4 drugs ( $P<0.001$ ). Residents, healers, and attending physicians had the highest proportions  
5  
6 of cardiologists achieving the target blood pressure ( $P<0.001$ ) (Table S2). Globally, similar  
7  
8 patterns were observed when analyzing the data by male and female cardiologists  
9  
10 (Supplementary Tables S7 and S8).

### 11 12 13 **Factors associated with hypertension among cardiologists**

14  
15 Table S9 presents the univariable and multivariable analyses of the factors associated with  
16  
17 hypertension among Chinese cardiologists. Age (50-59 years: OR=1.397, 95%CI: 1.164-  
18  
19 1.678,  $P<0.001$ ;  $\geq 60$  years: OR=1.949, 95%CI: 1.534-2.476,  $P<0.001$  vs. 20-29 years),  
20  
21 female gender (OR=0.866, 95%CI: 0.813-0.924,  $P<0.001$  vs. male), academic degree  
22  
23 (bachelor: OR=0.629, 95%CI: 0.461-0.859,  $P=0.004$ ; master: OR=0.722, 95%CI: 0.528-  
24  
25 0.988,  $P=0.04$  vs. junior college), hospital level (secondary: OR=0.582, 95%CI: 0.464-  
26  
27 0.728,  $P<0.001$ ; tertiary: OR=0.579, 95%CI: 0.463-0.724,  $P<0.001$  vs. primary), BMI ( $\geq 24$   
28  
29  $\text{kg/m}^2$ : OR=1.314, 95%CI: 1.233-1.400,  $P<0.001$  vs. 18.5-23.9  $\text{kg/m}^2$ ), smoking (infrequent:  
30  
31 OR=0.568, 95%CI: 0.525-0.613,  $P<0.001$ ; never: OR=0.469, 95%CI: 0.431-0.509,  $P<0.001$   
32  
33 vs. frequent), and comorbidities (OR=3.158, 95%CI: 2.924-3.410,  $P<0.001$ ) were  
34  
35 independently associated with hypertension among cardiologists.  
36  
37  
38  
39  
40

### 41 42 **Factors associated with taking antihypertensive drugs among hypertensive** 43 44 **cardiologists**

45  
46 Table S10 presents the univariable and multivariable analyses of the factors associated with  
47  
48 taking antihypertensive drugs among hypertensive cardiologists. Age (30-39 years:  
49  
50 OR=1.433, 95%CI: 1.055-1.945,  $P=0.02$ ; 40-49 years: OR=1.989, 95%CI: 1.428-2.771,  
51  
52  $P<0.001$ ; 50-59 years: OR=2.282, 95%CI: 1.599-3.257,  $P<0.001$ ;  $\geq 60$  years: OR=2.677,  
53  
54 95%CI: 1.754-4.086,  $P<0.001$  vs. 20-29 years), female gender (OR=1.200, 95%CI: 1.059-  
55  
56  
57  
58  
59  
60

1  
2  
3  
4 1.359, P=0.004 vs. male), BMI ( $\geq 24$  kg/m<sup>2</sup>: OR=1.157, 95%CI: 1.031-1.299, P=0.01 vs.  
5  
6 18.5-23.9 kg/m<sup>2</sup>), smoking (infrequent: OR=0.502, 95%CI: 0.440-0.572, P<0.001; never:  
7  
8 OR=0.374, 95%CI: 0.322-0.434, P<0.001 vs. frequent), family history of cardiovascular  
9  
10 diseases (OR=1.400, 95%CI: 1.247-1.571, P<0.001), and comorbidities (OR=2.646, 95%CI:  
11  
12 2.351-2.977, P<0.001) were independently associated with taking antihypertensive drugs  
13  
14 among hypertensive cardiologists.  
15  
16

### 17 **Factors associated with reaching target blood pressure among hypertensive** 18 **cardiologists taking antihypertensive drugs** 19 20 21

22 Table S11 presents the univariable and multivariable analyses of the factors associated with  
23  
24 reaching target blood pressure among hypertensive cardiologists taking antihypertensive  
25  
26 drugs. Age (50-59 years: OR=0.465, 95%CI: 0.262-0.825, P=0.009 vs. 20-29 years),  
27  
28 hospital level (secondary: OR=2.878, 95%CI: 1.287-6.438, P=0.01; tertiary: OR=2.558,  
29  
30 95%CI: 1.147-5.704, P=0.02 vs. primary), professional title (residents: OR=2.768, 95%CI:  
31  
32 1.467-5.225, P=0.002 vs. general physicians), BMI ( $\geq 24$  kg/m<sup>2</sup>: OR=0.657, 95%CI: 0.548-  
33  
34 0.787, P<0.001 vs. 18.5-23.9 kg/m<sup>2</sup>), family history of cardiovascular diseases (OR=0.746,  
35  
36 95%CI: 0.624-0.891, P=0.001), and comorbidities (OR=0.811, 95%CI: 0.679-0.970,  
37  
38 P=0.02) were independently associated with reaching target blood pressure among  
39  
40 hypertensive cardiologists taking antihypertensive drugs.  
41  
42  
43  
44  
45  
46  
47

## 48 **DISCUSSION** 49

50 Chinese cardiologists have a poor knowledge of their own cardiovascular risk factors and  
51  
52 their work burden is high. The present study aimed to examine the risk factors for  
53  
54 cardiovascular diseases among Chinese cardiologists using a nationwide survey. The results  
55  
56  
57  
58  
59  
60

1  
2  
3  
4 suggest that Chinese cardiologists do not recognize and pay attention to their own  
5 cardiovascular health and that their work pressure is high. The identified risk factors could  
6 be used to identify cardiologists at higher risk for poor cardiovascular health and for  
7 implementing preventive interventions.  
8  
9

10  
11  
12  
13 In China, the prevalence of hypertension is around 24% [16-18], leading to a significant  
14 cardiovascular burden [19]. In the present study, the prevalence of hypertension was 25.3%,  
15 similar to the prevalence in the general Chinese population. A previous survey of  
16 cardiologists conducted in 2011 revealed participants' characteristics that were similar to  
17 those of the present study [11], further supporting the representativeness of our sample. Of  
18 course, there is a certain overlap between the samples of the two studies, but the exact  
19 extent of this overlap cannot be confirmed.  
20  
21  
22  
23  
24  
25  
26  
27  
28

29  
30 In the present study, 57.6% of the cardiologists had borderline or at-risk blood pressure  
31 (130-139/80-89 mmHg) and only 5.3% were taking antihypertensive drugs. In addition,  
32 22.0% had blood pressure  $\geq 140/\geq 90$  mmHg, but only 36.5% were taking antihypertensive  
33 drugs. Despite the expected health knowledge in physicians compared with the general  
34 population, this rate of treatment was surprisingly not better than in the general Chinese  
35 population [20 21]. Combined data from the Chinese (CHARLS study) and the American  
36 (NHANES study) general populations indicate that China had lower rates of hypertension  
37 treatment than the USA, and that the awareness and treatment of dyslipidemia were 3- and  
38 7-fold lower, respectively, than in the USA [17]. This is also supported by the CARE study,  
39 which showed that physicians had suboptimal awareness of their own cardiovascular risk,  
40 as well as suboptimal use of prophylaxis [14 15], and by the SOCRATES study, which  
41 showed that the self-awareness of cardiologists' own cardiovascular risk factors was mild  
42  
43  
44  
45  
46  
47  
48  
49  
50  
51  
52  
53  
54  
55  
56  
57  
58  
59  
60

1  
2  
3  
4 [6]. On the other hand, Abuissa et al. [22] showed that American cardiologists had  
5  
6 generally good lifestyle habits.

7  
8 Age, gender, BMI, smoking, family history of cardiovascular diseases, and comorbidities  
9 are well-known factors for the risk of having hypertension, compliance to treatment, and/or  
10 achieving the target blood pressure across the globe [23-25]. Aboyans et al. [9] showed that  
11 the awareness and management of smoking cessation strategies among smoking French  
12 cardiologists were low. In the present study, those factors were not only associated with the  
13 risk of having hypertension, but also with the risk of not taking the proper antihypertensive  
14 medication and the risk of not achieving the target blood pressure. Even if age, gender, and  
15 comorbidities are non-modifiable risk factors, they could help identify cardiologists in need  
16 of more efforts for seeking the proper cardiovascular treatments. This is supported by  
17 previous studies in various populations [20 26 27]. The SOCRATES study showed that the  
18 rate of using lipid-lowering, antihypertensive, and cardiovascular drugs was low among  
19 Italian cardiologists [6], supporting the present study.

20  
21  
22  
23  
24  
25  
26  
27  
28  
29  
30  
31  
32  
33  
34  
35  
36  
37  
38  
39  
40  
41  
42  
43  
44  
45  
46  
47  
48  
49  
50  
51  
52  
53  
54  
55  
56  
57  
58  
59  
60  
Great efforts are necessary to become a cardiologist in Western countries, but differences in  
the Chinese medical system make that less efforts are necessary to become a cardiologist in  
China, a situation that is currently being corrected [11 28-30]. The present study suggests  
that having a bachelor or master degree led to lower risk of hypertension compared with  
junior college level. This could be due to the fact that people with more advanced training  
possess more skills and knowledge, leading to less stress in their work. In addition, they  
have higher income, decreasing the need for working long and stressful hours. This is  
supported by a study that showed that physicians with a low education level had poor  
quality of life in China [13]. As more experienced physicians can have access to more

1  
2  
3  
4 advanced hospitals, we observed that cardiologists working in secondary and tertiary  
5 hospitals had a lower risk of having hypertension. This could be due to a better awareness  
6 of health knowledge in general, but also to the better material and human resources in more  
7 advanced hospitals, hereby lowering stress and workload [13 31]. Regarding workload, it is  
8 higher in China than in the USA, with 1.9 vs. 8.1 cardiologists per 100,000 people [11 12],  
9 and one study showed that the working hours of American physicians were decreasing over  
10 the years [32]. It has been shown that working long hours was associated with an increased  
11 cardiovascular risk [33]. Better knowledge and lower stress/workload can also be  
12 associated with being properly treated or not for hypertension and taking the proper steps,  
13 both on the medical and lifestyle points of view, to achieve the blood pressure targets, as  
14 observed in the present study. This is supported by a number of studies in the Chinese  
15 general population [20 21 34 35].

16  
17  
18  
19  
20  
21  
22  
23  
24  
25  
26  
27  
28  
29  
30  
31  
32 The strength of the present study lies in its large sample size (>26,000 participants) from all  
33 across China. On the other hand, because of funding and logistics, data had to be collected  
34 using a self-filled survey, which could introduce bias compared to a formal epidemiological  
35 study. Indeed, some physicians could be tempted to provide data that are better than the  
36 reality. Nevertheless, the prevalence of hypertension (based on the composite variable  
37 made of blood pressure and antihypertensive drugs, not on a formal inquiry about a  
38 diagnosis of hypertension) was similar to that of the general population of China,  
39 suggesting data validity. Of course, the medical system in China and the formation required  
40 to work in cardiology are different from that of other countries [11 28], limiting the  
41 generalizability of the data. Finally, the geographical distribution of the cardiologists across  
42 China was not taken into account. Additional studies are necessary to confirm those



1  
2  
3  
4 findings.  
5

6 In conclusion, the results suggest that Chinese cardiologists do not recognize and pay  
7 attention to their own cardiovascular health and that their work pressure is high. The  
8 identified risk factors could be used to identify cardiologists at higher risk for poor  
9 cardiovascular health and for implementing preventive interventions. Our results have a  
10 number of implications for the reform of health care awareness and prophylaxis in  
11 cardiologists in China.  
12  
13  
14  
15  
16  
17  
18  
19  
20  
21

## 22 **APPENDIX 1**

23 The China Cardiologist Heart Study Questionnaire  
24  
25  
26  
27  
28

## 29 **DATA SHARING STATEMENT**

30 No additional data are available.  
31  
32  
33  
34  
35

## 36 **ACKNOWLEDGMENTS**

37 The authors acknowledge the contribution of all physicians who participated in this survey.  
38  
39 The study was started by the Chinese Cardiovascular Association and supported by the  
40 GUSU group.  
41  
42  
43  
44  
45  
46  
47

## 48 **FUNDING**

49 The study is supported by the Emerging Frontier Project of Shanghai Hospital  
50 Development Center (No. SHDC12014101), the Innovative Research Group Project of  
51 National Natural Science Foundation of China (No. 81521001), and National Key Research  
52  
53  
54  
55  
56  
57  
58  
59  
60

1  
2  
3  
4 and Development Project (No. 2016YFC1301200). The authors declare that they have no  
5  
6 conflicts of interest.  
7  
8  
9

## 10 11 **CONFLICTS OF INTEREST** 12

13 The authors declare that they have no conflicts of interest.  
14  
15

## 16 17 18 **AUTHORS' CONTRIBUTIONS** 19

20 Lei Hou, Xuejuan Jin conceived and coordinated the study, designed, performed and  
21  
22 analyzed the experiments, wrote the paper. Jianying Ma, Juying Qian, Yong Huo carried  
23  
24 out the data collection, data analysis, and revised the paper. Junbo Ge designed the study,  
25  
26 carried out the data analysis, and revised the paper. All authors reviewed the results and  
27  
28 approved the final version of the manuscript.  
29  
30  
31  
32  
33  
34  
35  
36  
37  
38  
39  
40  
41  
42  
43  
44  
45  
46  
47  
48  
49  
50  
51  
52  
53  
54  
55  
56  
57  
58  
59  
60

**REFERENCES**

1. Goldstein JA, Balter S, Cowley M, et al. Occupational hazards of interventional cardiologists: prevalence of orthopedic health problems in contemporary practice. *Catheterization and cardiovascular interventions : official journal of the Society for Cardiac Angiography & Interventions* 2004;**63**:407-11.
2. Dehmer GJ. Occupational hazards for interventional cardiologists. *Catheterization and cardiovascular interventions : official journal of the Society for Cardiac Angiography & Interventions* 2006;**68**:974-6.
3. Clark DA. How much is too much? *Catheterization and cardiovascular interventions : official journal of the Society for Cardiac Angiography & Interventions* 2000;**51**:265.
4. Faggiano P, Temporelli PL, Zito G, et al. [Cardiovascular risk profile and lifestyle habits in a cohort of Italian cardiologists. Results of the SOCRATES survey]. *Monaldi archives for chest disease = Archivio Monaldi per le malattie del torace* 2013;**80**:118-25.
5. Michel JB, Sangha DM, Erwin JP, 3rd. Burnout Among Cardiologists. *The American journal of cardiology* 2017;**119**:938-40.
6. Temporelli PL, Zito G, Faggiano P, et al. Cardiovascular risk profile and lifestyle habits in a cohort of Italian cardiologists (from the SOCRATES Survey). *The American journal of cardiology* 2013;**112**:226-30.
7. Merz CN, Mensah GA, Fuster V, et al. Task force #5--the role of cardiovascular specialists as leaders in prevention: from training to champion. 33rd Bethesda Conference. *Journal of the American College of Cardiology* 2002;**40**:641-51.

- 1  
2  
3  
4 8. O'Kelly S, Andersen K, Capewell S, et al. Bringing prevention to the population: an  
5  
6 important role for cardiologists in policy-making. *European heart journal*  
7  
8 2011;**32**:1964-7.  
9
- 10  
11 9. Aboyans V, Pinet P, Lacroix P, et al. Knowledge and management of smoking-cessation  
12  
13 strategies among cardiologists in France: a nationwide survey. *Archives of*  
14  
15 *cardiovascular diseases* 2009;**102**:193-9.  
16  
17
- 18 10. Lu Y, Hu XM, Huang XL, et al. The relationship between job satisfaction, work stress,  
19  
20 work-family conflict, and turnover intention among physicians in Guangdong,  
21  
22 China: a cross-sectional study. *BMJ open* 2017;**7**:e014894.  
23  
24
- 25 11. Gong YJ, Huo Y. A Survey of National Cardiology Workforce in China. *European*  
26  
27 *heart journal* 2016;**18**:A1-A5.  
28
- 29 12. Narang A, Sinha SS, Rajagopalan B, et al. The Supply and Demand of the  
30  
31 Cardiovascular Workforce: Striking the Right Balance. *Journal of the American*  
32  
33 *College of Cardiology* 2016;**68**:1680-89.  
34  
35
- 36 13. Liang Y, Wang H, Tao X. Quality of life of young clinical doctors in public hospitals in  
37  
38 China's developed cities as measured by the Nottingham Health Profile (NHP).  
39  
40 *International journal for equity in health* 2015;**14**:85.  
41  
42
- 43 14. Steering Committee of the Physicians' Health Study Research G. Final report on the  
44  
45 aspirin component of the ongoing Physicians' Health Study. *The New England*  
46  
47 *journal of medicine* 1989;**321**:129-35.  
48  
49
- 50 15. Hu DY, Yu JM, Chen F, et al. The Chinese physicians' Cardiovascular Risk Evaluation  
51  
52 (CARE) survey: an assessment of physicians' own cardiovascular risks. *Heart Asia*  
53  
54 2010;**2**:89-94.  
55  
56  
57

16. Wu J, Cheng X, Qiu L, et al. Prevalence and Clustering of Major Cardiovascular Risk Factors in China: A Recent Cross-Sectional Survey. *Medicine* 2016;**95**:e2712.
17. Lu Y, Wang P, Zhou T, et al. Comparison of Prevalence, Awareness, Treatment, and Control of Cardiovascular Risk Factors in China and the United States. *Journal of the American Heart Association* 2018;**7**.
18. Yang F, Qian D, Hu DY, et al. Prevalence of cardiovascular disease risk factor clustering in Chinese adults. *Clin Trials Regul Sci Cardiol* 2016.
19. Sui H, Chen WW, Wang W. Interpretation of Report on Cardiovascular Diseases in China 2015. *Chin J Cardiovasc Med* 2016;**21**:259-61.
20. Huang XB, Chen F, Dai W, et al. Prevalence and risk factors associated with hypertension in the Chinese Qiang population. *Clinical and experimental hypertension* 2018;**40**:427-33.
21. Hu Y, Wang Z, Wang Y, et al. Prevalence, Awareness, Treatment, and Control of Hypertension among Kazakhs with high Salt Intake in Xinjiang, China: A Community-based Cross-sectional Study. *Scientific reports* 2017;**7**:45547.
22. Abuissa H, Lavie C, Spertus J, et al. Personal health habits of American cardiologists. *The American journal of cardiology* 2006;**97**:1093-6.
23. Lloyd-Jones DM, Evans JC, Levy D. Hypertension in adults across the age spectrum: current outcomes and control in the community. *Jama* 2005;**294**:466-72.
24. James PA, Oparil S, Carter BL, et al. 2014 evidence-based guideline for the management of high blood pressure in adults: report from the panel members appointed to the Eighth Joint National Committee (JNC 8). *Jama* 2014;**311**:507-20.
25. Leung AA, Daskalopoulou SS, Dasgupta K, et al. Hypertension Canada's 2017

- 1  
2  
3  
4 Guidelines for Diagnosis, Risk Assessment, Prevention, and Treatment of  
5  
6 Hypertension in Adults. *The Canadian journal of cardiology* 2017;**33**:557-76.  
7  
8  
9 26. Stockwell DH, Madhavan S, Cohen H, et al. The determinants of hypertension  
10 awareness, treatment, and control in an insured population. *American journal of*  
11  
12 *public health* 1994;**84**:1768-74.  
13  
14  
15  
16 27. Berhe DF, Taxis K, Haaijer-Ruskamp FM, et al. Hypertension treatment practices and  
17 its determinants among ambulatory patients: retrospective cohort study in Ethiopia.  
18  
19 *BMJ open* 2017;**7**:e015743.  
20  
21  
22  
23 28. Levinson W, King TE, Jr., Goldman L, et al. Clinical decisions. American Board of  
24 Internal Medicine maintenance of certification program. *The New England journal*  
25  
26 *of medicine* 2010;**362**:948-52.  
27  
28  
29  
30 29. Song P, Jin C, Tang W. New medical education reform in China: Towards healthy  
31 China 2030. *Bioscience trends* 2017;**11**:366-69.  
32  
33  
34  
35 30. The L. Medical education reform in China. *Lancet* 2017;**390**:334.  
36  
37  
38  
39 31. Chen X, Tan X, Li L. Health Problem and Occupational Stress among Chinese Doctors.  
40  
41 *Chin Med* 2013;**2013**:1-6.  
42  
43  
44  
45 32. Staiger DO, Auerbach DI, Buerhaus PI. Trends in the work hours of physicians in the  
46 United States. *Jama* 2010;**303**:747-53.  
47  
48  
49  
50 33. Conway SH, Pompeii LA, Roberts RE, et al. Dose-Response Relation Between Work  
51 Hours and Cardiovascular Disease Risk: Findings From the Panel Study of Income  
52 Dynamics. *Journal of occupational and environmental medicine* 2016;**58**:221-6.  
53  
54  
55  
56 34. Wu Y, Huxley R, Li L, et al. Prevalence, awareness, treatment, and control of  
57 hypertension in China: data from the China National Nutrition and Health Survey  
58  
59  
60

1  
2  
3  
4 2002. *Circulation* 2008;**118**:2679-86.  
5

- 6  
7 35. Wang J, Zhang L, Wang F, et al. Prevalence, awareness, treatment, and control of  
8  
9 hypertension in China: results from a national survey. *American journal of*  
10  
11 *hypertension* 2014;**27**:1355-61.  
12  
13  
14  
15  
16  
17  
18  
19  
20  
21  
22  
23  
24  
25  
26  
27  
28  
29  
30  
31  
32  
33  
34  
35  
36  
37  
38  
39  
40  
41  
42  
43  
44  
45  
46  
47  
48  
49  
50  
51  
52  
53  
54  
55  
56  
57  
58  
59  
60

For peer review only

**Table 1.** Demographic characteristics, current disease and medication of the participants

| Variable        | Total (n=28,924) |
|-----------------|------------------|
| Age (years)     | 37.82±9.27       |
| 20-29           | 5308 (18.35)     |
| 30-39           | 12,338 (42.66)   |
| 40-49           | 8019 (27.72)     |
| 50-59           | 2674 (9.24)      |
| 60-69           | 584 (2.02)       |
| ≥70             | 1 (0.00)         |
| Gender          |                  |
| Male            | 15,749 (54.45)   |
| Female          | 13,175 (45.55)   |
| Academic degree |                  |
| Junior college  | 225 (0.78)       |
| Bachelor        | 12,704 (43.92)   |
| Master          | 10,580 (36.58)   |
| Doctor          | 2905 (10.04)     |
| Post-doctor     | 412 (1.42)       |
| Others          | 2098 (7.25)      |
| Hospital level  |                  |
| Primary         | 381 (1.32)       |
| Secondary       | 10,823 (37.42)   |



|    |                                  |                |
|----|----------------------------------|----------------|
| 1  |                                  |                |
| 2  |                                  |                |
| 3  |                                  |                |
| 4  | Tertiary                         | 17,375 (60.07) |
| 5  |                                  |                |
| 6  | Others                           | 345 (1.19)     |
| 7  |                                  |                |
| 8  |                                  |                |
| 9  | Professional title               |                |
| 10 |                                  |                |
| 11 | General physician                | 4230 (14.62)   |
| 12 |                                  |                |
| 13 | Healer                           | 540 (1.87)     |
| 14 |                                  |                |
| 15 | Resident physician               | 966 (3.34)     |
| 16 |                                  |                |
| 17 | Attending physician              | 13,448 (46.49) |
| 18 |                                  |                |
| 19 | Associate chief physician        | 4674 (16.16)   |
| 20 |                                  |                |
| 21 | Chief physician                  | 2279 (7.88)    |
| 22 |                                  |                |
| 23 | Others                           | 2787 (9.64)    |
| 24 |                                  |                |
| 25 |                                  |                |
| 26 |                                  |                |
| 27 | BMI (kg/m <sup>2</sup> )         | 22.35±2.51     |
| 28 |                                  |                |
| 29 | <18.5                            | 1475 (5.10)    |
| 30 |                                  |                |
| 31 | 18.5-23.9                        | 19,304 (66.74) |
| 32 |                                  |                |
| 33 |                                  |                |
| 34 | ≥24                              | 8145 (28.16)   |
| 35 |                                  |                |
| 36 | Current disease                  |                |
| 37 |                                  |                |
| 38 | Coronary heart disease           | 1760 (6.08)    |
| 39 |                                  |                |
| 40 | Heart failure                    | 554 (1.92)     |
| 41 |                                  |                |
| 42 | Diabetes                         | 598 (2.07)     |
| 43 |                                  |                |
| 44 | Stroke/transient ischemic attack | 167 (0.58)     |
| 45 |                                  |                |
| 46 | Chronic kidney disease           | 409 (1.41)     |
| 47 |                                  |                |
| 48 | Peripheral vascular disease      | 431 (1.49)     |
| 49 |                                  |                |
| 50 | Hypertension                     | 7319 (25.30)   |
| 51 |                                  |                |
| 52 |                                  |                |
| 53 |                                  |                |
| 54 |                                  |                |
| 55 |                                  |                |
| 56 |                                  |                |
| 57 |                                  |                |
| 58 |                                  |                |
| 59 |                                  |                |
| 60 |                                  |                |

## Medication

|                        |             |
|------------------------|-------------|
| Antihypertensive drugs | 2323 (8.03) |
| Hypoglycemic agents    | 574 (1.98)  |
| Lipid-regulation drugs | 1223 (4.23) |

---

Data are expressed as mean±standard deviation or n (%). BMI, body mass index.

For peer review only

**Table 2.** Clinical characteristics of the participants

| Variable                                                | Total (n=28,924) |
|---------------------------------------------------------|------------------|
| Systolic blood pressure/diastolic blood pressure (mmHg) |                  |
| Systolic blood pressure                                 | 122.74±14.27     |
| Diastolic blood pressure                                | 81.2±12.04       |
| <130/<80                                                | 8802 (30.43)     |
| Taking antihypertensive drugs                           | 228 (2.59)       |
| 130-139/80-89                                           | 13,763 (47.58)   |
| Taking antihypertensive drugs                           | 732 (5.32)       |
| ≥140/≥90                                                | 6359 (21.99)     |
| Taking antihypertensive drugs                           | 2323 (36.53)     |
| Heart rate (bpm)                                        | 74.11±9.26       |
| <50                                                     | 1 (0.00)         |
| 50-59                                                   | 778 (2.69)       |
| 60-69                                                   | 6972 (24.1)      |
| 70-79                                                   | 13,033 (45.06)   |
| 80-89                                                   | 6600 (22.82)     |
| ≥90                                                     | 1540 (5.32)      |
| Fasting blood glucose (mmol/L)                          | 5.1±1.65         |
| <6.1                                                    | 26,030 (89.99)   |
| 6.1-6.9                                                 | 1810 (6.26)      |
| ≥7.0                                                    | 1084 (3.75)      |

|                |                |
|----------------|----------------|
| LDL-C (mmol/L) | 2.73±0.87      |
| <2.6           | 12,888 (44.56) |
| 2.6-3.3        | 12,058 (41.69) |
| 3.4-4.0        | 2363 (8.17)    |
| ≥4.1           | 1614 (5.58)    |
| Unknown        | 1 (0.00)       |
| HDL-C (mmol/L) | 1.85±1.02      |
| <1.0           | 1879 (6.50)    |
| ≥1.0           | 27,043 (93.50) |
| Unknown        | 2 (0.01)       |
| TC (mmol/L)    | 4.09±1.23      |
| <5.2           | 24,972 (86.34) |
| 5.2-6.1        | 2988 (10.33)   |
| ≥6.2           | 957 (3.31)     |
| Unknown        | 7 (0.02)       |
| TG (mmol/L)    | 1.6 (1.2,2.2)  |
| <1.7           | 15,547 (53.75) |
| 1.7-2.2        | 6345 (21.94)   |
| ≥2.3           | 7029 (24.30)   |
| Unknown        | 3 (0.01)       |
| Smoking        |                |
| Frequent       | 4660 (16.11)   |

|    |                |                |
|----|----------------|----------------|
| 1  |                |                |
| 2  |                |                |
| 3  |                |                |
| 4  | Infrequent     | 13,561 (46.88) |
| 5  |                |                |
| 6  | Never          | 10,703 (37.00) |
| 7  |                |                |
| 8  |                |                |
| 9  | Family history |                |
| 10 |                |                |
| 11 | Yes            | 22,611 (78.17) |
| 12 |                |                |
| 13 | No             | 6313 (21.83)   |
| 14 |                |                |
| 15 |                |                |

16 Data are expressed as mean±standard deviation or n (%). HDL-C, high density lipoprotein-  
17 cholesterol; LDL-C, low density lipoprotein-cholesterol; TC, total cholesterol; TG,  
18 triglyceride.  
19  
20  
21  
22  
23  
24  
25  
26  
27  
28  
29  
30  
31  
32  
33  
34  
35  
36  
37  
38  
39  
40  
41  
42  
43  
44  
45  
46  
47  
48  
49  
50  
51  
52  
53  
54  
55  
56  
57  
58  
59  
60

**Table 3.** Prevalence of diseases, rate of antihypertensive drugs taking, and rate of reaching the target blood pressure in cardiologists with different gender

| Variable                           | Total<br>(n=28,924) | Male<br>(n=15,749) | Female<br>(n=13,175) | P      |
|------------------------------------|---------------------|--------------------|----------------------|--------|
| Coronary heart disease             | 1760 (6.08)         | 1071 (6.80)        | 689 (5.23)           | <0.001 |
| Heart failure                      | 554 (1.92)          | 340 (2.16)         | 214 (1.62)           | 0.001  |
| Diabetes                           | 598 (2.07)          | 365 (2.32)         | 233 (1.77)           | 0.001  |
| Stroke/transient ischemic attack   | 167 (0.58)          | 96 (0.61)          | 71 (0.54)            | 0.430  |
| Chronic kidney disease             | 409 (1.41)          | 258 (1.64)         | 151 (1.15)           | <0.001 |
| Peripheral vascular disease        | 431 (1.49)          | 258 (1.64)         | 173 (1.31)           | 0.023  |
| Hypertension                       | 7319 (25.30)        | 4574 (29.00)       | 2745 (20.83)         | <0.001 |
| Taking antihypertensive drugs      | 2323 (31.74)        | 1533 (33.52)       | 790 (28.78)          | <0.001 |
| Reaching the target blood pressure | 960 (41.33)         | 610 (39.79)        | 350 (44.30)          | 0.036  |

Data are expressed as n (%).

**Table 4.** Prevalence of diseases, rate of antihypertensive drugs taking, and rate of reaching the target blood pressure in cardiologists with different age

| Variable                           | Total        | 20-29        | 30-39        | 40-49        | 50-59       | 60-69       | ≥70     | P      |
|------------------------------------|--------------|--------------|--------------|--------------|-------------|-------------|---------|--------|
|                                    | (n=28924)    | (n=5308)     | (n=12,338)   | (n=8019)     | (n=2674)    | (n=584)     | (n=1)   |        |
| Coronary heart disease             | 1760 (6.08)  | 272 (5.12)   | 595 (4.82)   | 609 (7.59)   | 219 (8.19)  | 65 (11.13)  | 0       | <0.001 |
| Heart failure                      | 554 (1.92)   | 124 (2.34)   | 215 (1.74)   | 149 (1.86)   | 50 (1.87)   | 16 (2.74)   | 0       | 0.099  |
| Diabetes                           | 598 (2.07)   | 81 (1.53)    | 193 (1.56)   | 194 (2.42)   | 97 (3.63)   | 33 (5.65)   | 0       | <0.001 |
| Stroke/transient ischemic attack   | 167 (0.58)   | 36 (0.68)    | 54 (0.44)    | 49 (0.61)    | 18 (0.67)   | 10 (1.71)   | 0       | 0.004  |
| Chronic kidney disease             | 409 (1.41)   | 63 (1.19)    | 142 (1.15)   | 151 (1.88)   | 42 (1.57)   | 11 (1.88)   | 0       | <0.001 |
| Peripheral vascular disease        | 431 (1.49)   | 104 (1.96)   | 132 (1.07)   | 128 (1.60)   | 57 (2.13)   | 10 (1.71)   | 0       | <0.001 |
| Hypertension                       | 7319 (25.3)  | 1276 (24.04) | 2680 (21.72) | 2158 (26.91) | 946 (35.38) | 258 (44.18) | 1 (100) | <0.001 |
| Taking antihypertensive drugs      | 2323 (31.74) | 256 (20.06)  | 738 (27.54)  | 806 (37.35)  | 397 (41.97) | 126 (48.84) | 0       | <0.001 |
| Reaching the target blood pressure | 960 (41.33)  | 124 (48.44)  | 322 (43.63)  | 336 (41.69)  | 130 (32.75) | 48 (38.10)  | -       | 0.001  |

Data are expressed as n (%).

**Table 5.** Prevalence of diseases, rate of antihypertensive drugs taking, and rate of reaching the target blood pressure in cardiologists with different hospital level

| Variable                           | Total        | Primary     | Secondary    | Tertiary     | Others     | P      |
|------------------------------------|--------------|-------------|--------------|--------------|------------|--------|
|                                    | (n=28,924)   | (n=381)     | (n=10,823)   | (n=17,375)   | (n=345)    |        |
| Coronary heart disease             | 1760 (6.08)  | 24 (6.30)   | 618 (5.71)   | 1099 (6.33)  | 19 (5.51)  | 0.199  |
| Heart failure                      | 554 (1.92)   | 4 (1.05)    | 219 (2.02)   | 326 (1.88)   | 5 (1.45)   | 0.435  |
| Diabetes                           | 598 (2.07)   | 11 (2.89)   | 239 (2.21)   | 345 (1.99)   | 3 (0.87)   | 0.148  |
| Stroke/transient ischemic attack   | 167 (0.58)   | 4 (1.05)    | 61 (0.56)    | 100 (0.58)   | 2 (0.58)   | 0.584  |
| Chronic kidney disease             | 409 (1.41)   | 3 (0.79)    | 154 (1.42)   | 250 (1.44)   | 2 (0.58)   | 0.411  |
| Peripheral vascular disease        | 431 (1.49)   | 2 (0.52)    | 155 (1.43)   | 271 (1.56)   | 3 (0.87)   | 0.246  |
| Hypertension                       | 7319 (25.30) | 136 (35.70) | 2695 (24.90) | 4413 (25.40) | 75 (21.74) | <0.001 |
| Taking antihypertensive drugs      | 2323 (31.74) | 38 (27.94)  | 904 (33.43)  | 1354 (30.68) | 27 (36.00) | 0.049  |
| Reaching the target blood pressure | 960 (41.33)  | 8 (21.05)   | 390 (43.14)  | 551 (40.69)  | 11 (40.74) | 0.048  |

Data are expressed as n (%).



**Table S1.** Area of expertise of the participants

| Variable                                   | Total (n=28,924) |
|--------------------------------------------|------------------|
| Atherosclerosis and coronary heart disease | 14,783 (51.11)   |
| Hypertension                               | 18,477 (63.88)   |
| Arrhythmia and electrophysiology           | 8226 (28.44)     |
| Blood lipid metabolism                     | 10,147 (35.08)   |
| Congenital heart disease                   | 4678 (16.17)     |
| Heart failure                              | 9087 (31.42)     |
| Pulmonary vascular disease                 | 2859 (9.88)      |
| Cardiac intensive care and monitoring      | 2051 (7.09)      |
| Interventional cardiology                  | 2526 (8.73)      |
| Cardiovascular imaging                     | 2742 (9.48)      |
| Senile cardiovascular disease              | 0                |
| Female cardiovascular disease              | 2859 (9.88)      |
| Structural heart disease                   | 3774 (13.05)     |
| Basic-clinical combination                 | 2350 (8.12)      |
| Others                                     | 2746 (9.49)      |

Data are expressed as n (%).

**Table S2.** Prevalence of diseases, rate of antihypertensive drugs taking, and rate of reaching the target blood pressure in cardiologists with different professional title

| Variable                           | Total<br>(n=28,924) | General<br>physician<br>(n=4230) | Healer<br>(n=540) | Resident<br>physician<br>(n=966) | Attending<br>physician<br>(n=13,448) | Associate chief<br>physician<br>(n=4674) | Chief<br>physician<br>(n=2279) | Others<br>(n=2787) | P      |
|------------------------------------|---------------------|----------------------------------|-------------------|----------------------------------|--------------------------------------|------------------------------------------|--------------------------------|--------------------|--------|
| Coronary heart disease             | 1760 (6.08)         | 185 (4.37)                       | 39 (7.22)         | 93 (9.63)                        | 713 (5.30)                           | 382 (8.17)                               | 191 (8.38)                     | 157 (5.63)         | <0.001 |
| Heart failure                      | 554 (1.92)          | 79 (1.87)                        | 19 (3.52)         | 26 (2.69)                        | 242 (1.80)                           | 79 (1.69)                                | 35 (1.54)                      | 74 (2.66)          | 0.001  |
| Diabetes                           | 598 (2.07)          | 60 (1.42)                        | 13 (2.41)         | 27 (2.80)                        | 250 (1.86)                           | 132 (2.82)                               | 70 (3.07)                      | 46 (1.65)          | <0.001 |
| Stroke/transient ischemic attack   | 167 (0.58)          | 16 (0.38)                        | 5 (0.93)          | 9 (0.93)                         | 65 (0.48)                            | 28 (0.60)                                | 18 (0.79)                      | 26 (0.93)          | 0.013  |
| Chronic kidney disease             | 409 (1.41)          | 41 (0.97)                        | 15 (2.78)         | 28 (2.90)                        | 167 (1.24)                           | 80 (1.71)                                | 30 (1.32)                      | 48 (1.72)          | <0.001 |
| Peripheral vascular disease        | 431 (1.49)          | 62 (1.47)                        | 8 (1.48)          | 25 (2.60)                        | 159 (1.18)                           | 76 (1.63)                                | 37 (1.62)                      | 64 (2.30)          | <0.001 |
| Hypertension                       | 7319 (25.30)        | 896 (21.18)                      | 139 (25.74)       | 263 (27.23)                      | 3032 (22.55)                         | 1413 (30.23)                             | 806 (35.37)                    | 770 (27.63)        | <0.001 |
| Taking antihypertensive drugs      | 2323 (31.74)        | 179 (19.98)                      | 46 (33.09)        | 88 (33.46)                       | 934 (30.80)                          | 546 (38.64)                              | 357 (44.29)                    | 173 (22.47)        | <0.001 |
| Reaching the target blood pressure | 960 (41.33)         | 70 (39.11)                       | 21 (45.65)        | 49 (55.68)                       | 404 (43.25)                          | 192 (35.16)                              | 135 (37.82)                    | 89 (51.45)         | <0.001 |

Data are expressed as n (%).

**Table S3.** Prevalence of diseases, rate of antihypertensive drugs taking, and rate of reaching the target blood pressure in male cardiologists with different age

| Variable                           | 20-29<br>(n=2437) | 30-39<br>(n=6777) | 40-49<br>(n=4521) | 50-59<br>(n=1656) | 60-69<br>(n=357) | ≥70<br>(n=1) | P      |
|------------------------------------|-------------------|-------------------|-------------------|-------------------|------------------|--------------|--------|
| Coronary heart disease             | 156 (6.4)         | 385 (5.7)         | 349 (7.7)         | 141 (8.5)         | 40 (11.2)        | 0            | <0.001 |
| Heart failure                      | 67 (2.7)          | 137 (2)           | 94 (2.1)          | 33 (2.0)          | 9 (2.5)          | 0            | 0.389  |
| Diabetes                           | 44 (1.8)          | 116 (1.7)         | 120 (2.7)         | 66 (4.0)          | 19 (5.3)         | 0            | <0.001 |
| Stroke/transient ischemic attack   | 19 (0.8)          | 29 (0.4)          | 29 (0.6)          | 14 (0.8)          | 5 (1.4)          | 0            | 0.071  |
| Chronic kidney disease             | 41 (1.7)          | 91 (1.3)          | 90 (2)            | 28 (1.7)          | 8 (2.2)          | 0            | 0.154  |
| Peripheral vascular disease        | 58 (2.4)          | 82 (1.2)          | 76 (1.7)          | 36 (2.2)          | 6 (1.7)          | 0            | 0.002  |
| Hypertension                       | 684 (28.1)        | 1709 (25.2)       | 1362 (30.1)       | 647 (39.1)        | 171 (47.9)       | 1 (100)      | <0.001 |
| Taking antihypertensive drugs      | 159 (23.2)        | 510 (29.8)        | 506 (37.2)        | 272 (42)          | 86 (50.3)        | 0            | <0.001 |
| Reaching the target blood pressure | 124 (48.4)        | 322 (43.6)        | 336 (41.7)        | 130 (32.7)        | 48 (38.1)        | -            | 0.001  |

Data are expressed as n (%).

**Table S4.** Prevalence of diseases, rate of antihypertensive drugs taking, and rate of reaching the target blood pressure in female cardiologists with different age

| Variable                           | 20-29<br>(n=2871) | 30-39<br>(n=5561) | 40-49<br>(n=3498) | 50-59<br>(n=1018) | 60-69<br>(n=227) | P      |
|------------------------------------|-------------------|-------------------|-------------------|-------------------|------------------|--------|
| Coronary heart disease             | 116 (4)           | 210 (3.8)         | 260 (7.4)         | 78 (7.7)          | 25 (11.0)        | <0.001 |
| Heart failure                      | 57 (2.0)          | 78 (1.4)          | 55 (1.6)          | 17 (1.7)          | 7 (3.1)          | 0.128  |
| Diabetes                           | 37 (1.3)          | 77 (1.4)          | 74 (2.1)          | 31 (3)            | 14 (6.2)         | <0.001 |
| Stroke/transient ischemic attack   | 17 (0.6)          | 25 (0.4)          | 20 (0.6)          | 4 (0.4)           | 5 (2.2)          | 0.010  |
| Chronic kidney disease             | 22 (0.8)          | 51 (0.9)          | 61 (1.7)          | 14 (1.4)          | 3 (1.3)          | 0.001  |
| Peripheral vascular disease        | 46 (1.6)          | 50 (0.9)          | 52 (1.5)          | 21 (2.1)          | 4 (1.8)          | 0.005  |
| Hypertension                       | 592 (20.6)        | 971 (17.5)        | 796 (22.8)        | 299 (29.4)        | 87 (38.3)        | <0.001 |
| Taking antihypertensive drugs      | 97 (16.4)         | 228 (23.5)        | 300 (37.7)        | 125 (41.8)        | 40 (46.0)        | <0.001 |
| Reaching the target blood pressure | 51 (52.6)         | 107 (46.9)        | 132 (44)          | 45 (36)           | 15 (37.5)        | 0.108  |

Data are expressed as n (%).

**Table S5.** Prevalence of diseases, rate of antihypertensive drugs taking, and rate of reaching the target blood pressure in male cardiologists with different hospital level

| Variable                           | Primary<br>(n=211) | Secondary<br>(n=5807) | Tertiary<br>(n=9552) | Others<br>(n=179) | P      |
|------------------------------------|--------------------|-----------------------|----------------------|-------------------|--------|
| Coronary heart disease             | 12 (5.7)           | 361 (6.2)             | 687 (7.2)            | 11 (6.1)          | 0.113  |
| Heart failure                      | 3 (1.4)            | 137 (2.4)             | 196 (2.1)            | 4 (2.2)           | 0.561  |
| Diabetes                           | 5 (2.4)            | 156 (2.7)             | 201 (2.1)            | 3 (1.7)           | 0.133  |
| Stroke/transient ischemic attack   | 1 (0.5)            | 35 (0.6)              | 59 (0.6)             | 1 (0.6)           | 1.000  |
| Chronic kidney disease             | 2 (0.9)            | 94 (1.6)              | 160 (1.7)            | 2 (1.1)           | 0.918  |
| Peripheral vascular disease        | 1 (0.5)            | 88 (1.5)              | 169 (1.8)            | 0                 | 0.098  |
| Hypertension                       | 92 (43.6)          | 1674 (28.8)           | 2765 (28.9)          | 43 (24.0)         | <0.001 |
| Taking antihypertensive drugs      | 28 (30.4)          | 581 (34.7)            | 912 (33)             | 12 (27.9)         | 0.491  |
| Reaching the target blood pressure | 5 (17.9)           | 229 (39.4)            | 374 (41)             | 2 (16.7)          | 0.031  |

Data are expressed as n (%).

**Table S6.** Prevalence of diseases, rate of antihypertensive drugs taking, and rate of reaching the target blood pressure in female cardiologists with different hospital level

| Variable                           | Primary<br>(n=170) | Secondary<br>(n=5016) | Tertiary<br>(n=7823) | Others<br>(n=166) | P     |
|------------------------------------|--------------------|-----------------------|----------------------|-------------------|-------|
| Coronary heart disease             | 12 (7.1)           | 257 (5.1)             | 412 (5.3)            | 8 (4.8)           | 0.720 |
| Heart failure                      | 1 (0.6)            | 82 (1.6)              | 130 (1.7)            | 1 (0.6)           | 0.677 |
| Diabetes                           | 6 (3.5)            | 83 (1.7)              | 144 (1.8)            | 0                 | 0.071 |
| Stroke/transient ischemic attack   | 3 (1.8)            | 26 (0.5)              | 41 (0.5)             | 1(0.6)            | 0.175 |
| Chronic kidney disease             | 1 (0.6)            | 60 (1.2)              | 90 (1.2)             | 0                 | 0.643 |
| Peripheral vascular disease        | 1 (0.6)            | 67 (1.3)              | 102 (1.3)            | 3 (1.8)           | 0.782 |
| Hypertension                       | 44 (25.9)          | 1021 (20.4)           | 1648 (21.1)          | 32 (19.3)         | 0.281 |
| Taking antihypertensive drugs      | 10 (22.7)          | 323 (31.6)            | 442 (26.8)           | 15 (46.9)         | 0.005 |
| Reaching the target blood pressure | 3 (30.0)           | 161 (49.8)            | 177 (40)             | 9 (60.0)          | 0.022 |

Data are expressed as n (%).

**Table S7.** Prevalence of diseases, rate of antihypertensive drugs taking, and rate of reaching the target blood pressure in male cardiologists with different professional title

| Variable                           | General physician<br>(n=2049) | Healer<br>(n=260) | Resident physician<br>(n=548) | Attending physician<br>(n=7447) | Associate physician<br>(n=2740) | chief<br>physician<br>(n=1447) | Chief<br>physician<br>(n=1258) | Others<br>(n=1258) | P |
|------------------------------------|-------------------------------|-------------------|-------------------------------|---------------------------------|---------------------------------|--------------------------------|--------------------------------|--------------------|---|
| Coronary heart disease             | 107 (5.2)                     | 22 (8.5)          | 55 (10)                       | 433 (5.8)                       | 233 (8.5)                       | 130 (9.0)                      | 91 (7.2)                       | <0.001             |   |
| Heart failure                      | 44 (2.1)                      | 13 (5.0)          | 18 (3.3)                      | 155 (2.1)                       | 47 (1.7)                        | 21 (1.5)                       | 42 (3.3)                       | <0.001             |   |
| Diabetes                           | 40 (2.0)                      | 9 (3.5)           | 16 (2.9)                      | 144 (1.9)                       | 85 (3.1)                        | 50 (3.5)                       | 21 (1.7)                       | <0.001             |   |
| Stroke/transient ischemic attack   | 9 (0.4)                       | 2 (0.8)           | 5 (0.9)                       | 39 (0.5)                        | 16 (0.6)                        | 11 (0.8)                       | 14 (1.1)                       | 0.194              |   |
| Chronic kidney disease             | 27 (1.3)                      | 8 (3.1)           | 13 (2.4)                      | 103 (1.4)                       | 52 (1.9)                        | 23 (1.6)                       | 32 (2.5)                       | 0.009              |   |
| Peripheral vascular disease        | 35 (1.7)                      | 7 (2.7)           | 18 (3.3)                      | 97 (1.3)                        | 43 (1.6)                        | 21 (1.5)                       | 37 (2.9)                       | <0.001             |   |
| Hypertension                       | 507 (24.7)                    | 82 (31.5)         | 159 (29)                      | 1944 (26.1)                     | 896 (32.7)                      | 579 (40.0)                     | 407 (32.4)                     | <0.001             |   |
| Taking antihypertensive drugs      | 120 (23.7)                    | 33 (40.2)         | 63 (39.6)                     | 620 (31.9)                      | 335 (37.4)                      | 264 (45.6)                     | 98 (24.1)                      | <0.001             |   |
| Reaching the target blood pressure | 43 (35.8)                     | 11 (33.3)         | 32 (50.8)                     | 259 (41.8)                      | 117 (34.9)                      | 96 (36.4)                      | 52 (53.1)                      | 0.008              |   |

Data are expressed as n (%).

**Table S8.** Prevalence of diseases, rate of antihypertensive drugs taking, and rate of reaching the target blood pressure in female cardiologists with different professional title

| Variable                           | General physician<br>(n=2181) | Healer<br>(n=280) | Resident physician<br>(n=418) | Attending physician<br>(n=6001) | Associate chief physician<br>(n=1934) | Chief physician<br>(n=832) | Others<br>(n=1529) | P      |
|------------------------------------|-------------------------------|-------------------|-------------------------------|---------------------------------|---------------------------------------|----------------------------|--------------------|--------|
| Coronary heart disease             | 78 (3.6)                      | 17 (6.1)          | 38 (9.1)                      | 280 (4.7)                       | 149 (7.7)                             | 61 (7.3)                   | 66 (4.3)           | <0.001 |
| Heart failure                      | 35 (1.6)                      | 6 (2.1)           | 8 (1.9)                       | 87 (1.4)                        | 32 (1.7)                              | 14 (1.7)                   | 32 (2.1)           | 0.681  |
| Diabetes                           | 20 (0.9)                      | 4 (1.4)           | 11 (2.6)                      | 106 (1.8)                       | 47 (2.4)                              | 20 (2.4)                   | 25 (1.6)           | 0.006  |
| Stroke/transient ischemic attack   | 7 (0.3)                       | 3 (1.1)           | 4 (1)                         | 26 (0.4)                        | 12 (0.6)                              | 7 (0.8)                    | 12 (0.8)           | 0.085  |
| Chronic kidney disease             | 14 (0.6)                      | 7 (2.5)           | 15 (3.6)                      | 64 (1.1)                        | 28 (1.4)                              | 7 (0.8)                    | 16 (1.0)           | <0.001 |
| Peripheral vascular disease        | 27 (1.2)                      | 1 (0.4)           | 7 (1.7)                       | 62 (1.0)                        | 33 (1.7)                              | 16 (1.9)                   | 27 (1.8)           | 0.039  |
| Hypertension                       | 389 (17.8)                    | 57 (20.4)         | 104 (24.9)                    | 1088 (18.1)                     | 517 (26.7)                            | 227 (27.3)                 | 363 (23.7)         | <0.001 |
| Taking antihypertensive drugs      | 59 (15.2)                     | 13 (22.8)         | 25 (24.0)                     | 314 (28.9)                      | 211 (40.8)                            | 93 (41.0)                  | 75 (20.7)          | <0.001 |
| Reaching the target blood pressure | 27 (45.8)                     | 10 (76.9)         | 17 (68.0)                     | 145 (46.2)                      | 75 (35.5)                             | 39 (41.9)                  | 37 (49.3)          | 0.004  |

Data are expressed as n (%).



**Table S9.** Univariable and multivariable logistic regressions for hypertension among cardiologists

| Variable               | Univariable logistic regression |        | Multivariable logistic regression |        |
|------------------------|---------------------------------|--------|-----------------------------------|--------|
|                        | OR (95%CI)                      | P      | OR (95%CI)                        | P      |
| <b>Age</b>             |                                 |        |                                   |        |
| 20-29                  | Reference                       |        | Reference                         |        |
| 30-39                  | 0.877 (0.813,0.946)             | 0.001  | 0.915 (0.793,1.056)               | 0.227  |
| 40-49                  | 1.163 (1.074,1.26)              | <0.001 | 1.012 (0.861,1.189)               | 0.885  |
| 50-59                  | 1.73 (1.563,1.914)              | <0.001 | 1.397 (1.164,1.678)               | <0.001 |
| ≥60                    | 2.51 (2.108,2.99)               | <0.001 | 1.949 (1.534,2.476)               | <0.001 |
| <b>Gender</b>          |                                 |        |                                   |        |
| Male                   | Reference                       |        |                                   |        |
| Female                 | 0.643 (0.609,0.679)             | <0.001 | 0.866 (0.813,0.924)               | <0.001 |
| <b>Academic degree</b> |                                 |        |                                   |        |
| Junior college         | Reference                       |        | Reference                         |        |
| Bachelor               | 0.631 (0.476,0.837)             | 0.001  | 0.629 (0.461,0.859)               | 0.004  |

|    |                           |                     |        |                     |        |
|----|---------------------------|---------------------|--------|---------------------|--------|
| 1  |                           |                     |        |                     |        |
| 2  |                           |                     |        |                     |        |
| 3  |                           |                     |        |                     |        |
| 4  |                           |                     |        |                     |        |
| 5  | Master                    | 0.713 (0.538,0.946) | 0.019  | 0.722 (0.528,0.988) | 0.042  |
| 6  |                           |                     |        |                     |        |
| 7  | Doctor                    | 0.86 (0.643,1.149)  | 0.307  | 0.774 (0.56,1.069)  | 0.120  |
| 8  |                           |                     |        |                     |        |
| 9  | Post-doctor               | 1.049 (0.742,1.482) | 0.787  | 0.776 (0.53,1.136)  | 0.191  |
| 10 |                           |                     |        |                     |        |
| 11 | Others                    | 0.844 (0.628,1.133) | 0.258  | 0.771 (0.553,1.074) | 0.124  |
| 12 |                           |                     |        |                     |        |
| 13 |                           |                     |        |                     |        |
| 14 | Hospital level            |                     |        |                     |        |
| 15 |                           |                     |        |                     |        |
| 16 | Primary                   | Reference           |        | Reference           |        |
| 17 |                           |                     |        |                     |        |
| 18 | Secondary                 | 0.597 (0.482,0.74)  | <0.001 | 0.582 (0.464,0.728) | <0.001 |
| 19 |                           |                     |        |                     |        |
| 20 | Tertiary                  | 0.613 (0.496,0.758) | <0.001 | 0.579 (0.463,0.724) | <0.001 |
| 21 |                           |                     |        |                     |        |
| 22 | Others                    | 0.5 (0.359,0.696)   | <0.001 | 0.508 (0.359,0.717) | <0.001 |
| 23 |                           |                     |        |                     |        |
| 24 |                           |                     |        |                     |        |
| 25 | Professional title        |                     |        |                     |        |
| 26 |                           |                     |        |                     |        |
| 27 | General physician         | Reference           |        | Reference           |        |
| 28 |                           |                     |        |                     |        |
| 29 | Healer                    | 1.29 (1.049,1.586)  | 0.016  | 1.01 (0.791,1.291)  | 0.934  |
| 30 |                           |                     |        |                     |        |
| 31 | Resident physician        | 1.392 (1.187,1.633) | <0.001 | 1.064 (0.871,1.301) | 0.542  |
| 32 |                           |                     |        |                     |        |
| 33 | Attending physician       | 1.083 (0.996,1.178) | 0.063  | 0.965 (0.841,1.107) | 0.611  |
| 34 |                           |                     |        |                     |        |
| 35 | Associate chief physician | 1.612 (1.464,1.776) | <0.001 | 1.118 (0.948,1.317) | 0.185  |
| 36 |                           |                     |        |                     |        |
| 37 |                           |                     |        |                     |        |
| 38 |                           |                     |        |                     |        |
| 39 |                           |                     |        |                     |        |
| 40 |                           |                     |        |                     |        |
| 41 |                           |                     |        |                     |        |
| 42 |                           |                     |        |                     |        |
| 43 |                           |                     |        |                     |        |
| 44 |                           |                     |        |                     |        |
| 45 |                           |                     |        |                     |        |
| 46 |                           |                     |        |                     |        |

|    |                          |                     |        |                     |        |
|----|--------------------------|---------------------|--------|---------------------|--------|
| 1  |                          |                     |        |                     |        |
| 2  |                          |                     |        |                     |        |
| 3  |                          |                     |        |                     |        |
| 4  |                          |                     |        |                     |        |
| 5  | Chief physician          | 2.037 (1.819,2.281) | <0.001 | 1.131 (0.94,1.361)  | 0.192  |
| 6  |                          |                     |        |                     |        |
| 7  | Others                   | 1.42 (1.271,1.587)  | <0.001 | 1.193 (0.99,1.438)  | 0.063  |
| 8  |                          |                     |        |                     |        |
| 9  | BMI (kg/m <sup>2</sup> ) |                     |        |                     |        |
| 10 |                          |                     |        |                     |        |
| 11 | <18.5                    | 0.744 (0.649,0.853) | <0.001 | 0.919 (0.797,1.061) | 0.248  |
| 12 |                          |                     |        |                     |        |
| 13 | 18.5-23.9                | Reference           |        | Reference           |        |
| 14 |                          |                     |        |                     |        |
| 15 | ≥24                      | 1.627 (1.536,1.723) | <0.001 | 1.314 (1.233,1.4)   | <0.001 |
| 16 |                          |                     |        |                     |        |
| 17 |                          |                     |        |                     |        |
| 18 | Smoking                  |                     |        |                     |        |
| 19 |                          |                     |        |                     |        |
| 20 | Frequent                 | Reference           |        | Reference           |        |
| 21 |                          |                     |        |                     |        |
| 22 | Infrequent               | 0.422 (0.394,0.453) | <0.001 | 0.568 (0.525,0.613) | <0.001 |
| 23 |                          |                     |        |                     |        |
| 24 | Never                    | 0.342 (0.318,0.369) | <0.001 | 0.469 (0.431,0.509) | <0.001 |
| 25 |                          |                     |        |                     |        |
| 26 |                          |                     |        |                     |        |
| 27 | Family history           |                     |        |                     |        |
| 28 |                          |                     |        |                     |        |
| 29 | No                       | Reference           |        | Reference           |        |
| 30 |                          |                     |        |                     |        |
| 31 | Yes                      | 1.77 (1.667,1.880)  | <0.001 | 1.261 (1.18,1.348)  | <0.001 |
| 32 |                          |                     |        |                     |        |
| 33 |                          |                     |        |                     |        |
| 34 | Comorbidity              |                     |        |                     |        |
| 35 |                          |                     |        |                     |        |
| 36 | No                       | Reference           |        | Reference           |        |
| 37 |                          |                     |        |                     |        |
| 38 |                          |                     |        |                     |        |
| 39 |                          |                     |        |                     |        |
| 40 |                          |                     |        |                     |        |
| 41 |                          |                     |        |                     |        |
| 42 |                          |                     |        |                     |        |
| 43 |                          |                     |        |                     |        |
| 44 |                          |                     |        |                     |        |
| 45 |                          |                     |        |                     |        |
| 46 |                          |                     |        |                     |        |

1  
2  
3  
4  
5 Yes 4.003 (3.723,4.304) <0.001 3.158 (2.924,3.41) <0.001  
6  
7  
8  
9  
10  
11  
12  
13  
14  
15  
16  
17  
18  
19  
20  
21  
22  
23  
24  
25  
26  
27  
28  
29  
30  
31  
32  
33  
34  
35  
36  
37  
38  
39  
40  
41  
42  
43  
44  
45  
46

---

For peer review only

**Table S10.** Univariable and multivariable logistic regressions for antihypertensive drugs taking among cardiologists with hypertension

| Variable               | Univariable logistic regression |        | Multivariable logistic regression |        |
|------------------------|---------------------------------|--------|-----------------------------------|--------|
|                        | OR (95%CI)                      | P      | OR (95%CI)                        | P      |
| <b>Age</b>             |                                 |        |                                   |        |
| 20-29                  | Reference                       |        | Reference                         |        |
| 30-39                  | 1.514 (1.289,1.779)             | <0.001 | 1.433 (1.055,1.945)               | 0.021  |
| 40-49                  | 2.375 (2.019,2.794)             | <0.001 | 1.989 (1.428,2.771)               | <0.001 |
| 50-59                  | 2.881 (2.387,3.478)             | <0.001 | 2.282 (1.599,3.257)               | <0.001 |
| ≥60                    | 3.775 (2.854,4.992)             | <0.001 | 2.677 (1.754,4.086)               | <0.001 |
| <b>Gender</b>          |                                 |        |                                   |        |
| Male                   | Reference                       |        | Reference                         |        |
| Female                 | 0.802 (0.723,0.889)             | <0.001 | 1.2 (1.059,1.359)                 | 0.004  |
| <b>Academic degree</b> |                                 |        |                                   |        |
| Junior college         | Reference                       |        | Reference                         |        |
| Bachelor               | 1.565 (0.905,2.708)             | 0.109  | 1.025 (0.553,1.901)               | 0.938  |

|    |                           |                     |        |                     |       |
|----|---------------------------|---------------------|--------|---------------------|-------|
| 1  |                           |                     |        |                     |       |
| 2  |                           |                     |        |                     |       |
| 3  |                           |                     |        |                     |       |
| 4  |                           |                     |        |                     |       |
| 5  | Master                    | 1.506 (0.87,2.607)  | 0.144  | 0.915 (0.491,1.705) | 0.780 |
| 6  |                           |                     |        |                     |       |
| 7  | Doctor                    | 1.809 (1.033,3.168) | 0.038  | 0.93 (0.492,1.757)  | 0.822 |
| 8  |                           |                     |        |                     |       |
| 9  | Post-doctor               | 2.46 (1.298,4.659)  | 0.006  | 1.092 (0.534,2.235) | 0.809 |
| 10 |                           |                     |        |                     |       |
| 11 | Others                    | 1.057 (0.596,1.876) | 0.849  | 1.428 (0.729,2.8)   | 0.299 |
| 12 |                           |                     |        |                     |       |
| 13 |                           |                     |        |                     |       |
| 14 | Hospital level            |                     |        |                     |       |
| 15 |                           |                     |        |                     |       |
| 16 | Primary                   | Reference           |        |                     |       |
| 17 |                           |                     |        |                     |       |
| 18 | Secondary                 | 1.302 (0.888,1.909) | 0.177  |                     |       |
| 19 |                           |                     |        |                     |       |
| 20 | Tertiary                  | 1.142 (0.781,1.669) | 0.495  |                     |       |
| 21 |                           |                     |        |                     |       |
| 22 | Others                    | 1.451 (0.794,2.649) | 0.226  |                     |       |
| 23 |                           |                     |        |                     |       |
| 24 |                           |                     |        |                     |       |
| 25 | Professional title        |                     |        |                     |       |
| 26 |                           |                     |        |                     |       |
| 27 | General physician         | Reference           |        | Reference           |       |
| 28 |                           |                     |        |                     |       |
| 29 | Healer                    | 1.981 (1.342,2.925) | 0.001  | 1.233 (0.765,1.989) | 0.390 |
| 30 |                           |                     |        |                     |       |
| 31 | Resident physician        | 2.014 (1.486,2.73)  | <0.001 | 1.084 (0.736,1.596) | 0.684 |
| 32 |                           |                     |        |                     |       |
| 33 | Attending physician       | 1.783 (1.488,2.137) | <0.001 | 1.165 (0.878,1.546) | 0.290 |
| 34 |                           |                     |        |                     |       |
| 35 | Associate chief physician | 2.523 (2.074,3.068) | <0.001 | 1.24 (0.898,1.711)  | 0.192 |
| 36 |                           |                     |        |                     |       |
| 37 |                           |                     |        |                     |       |
| 38 |                           |                     |        |                     |       |
| 39 |                           |                     |        |                     |       |
| 40 |                           |                     |        |                     |       |
| 41 |                           |                     |        |                     |       |
| 42 |                           |                     |        |                     |       |
| 43 |                           |                     |        |                     |       |
| 44 |                           |                     |        |                     |       |
| 45 |                           |                     |        |                     |       |
| 46 |                           |                     |        |                     |       |

|    |                          |                     |        |                     |        |
|----|--------------------------|---------------------|--------|---------------------|--------|
| 1  |                          |                     |        |                     |        |
| 2  |                          |                     |        |                     |        |
| 3  |                          |                     |        |                     |        |
| 4  |                          |                     |        |                     |        |
| 5  | Chief physician          | 3.185 (2.569,3.948) | <0.001 | 1.407 (0.993,1.992) | 0.055  |
| 6  |                          |                     |        |                     |        |
| 7  | Others                   | 1.161 (0.917,1.469) | 0.215  | 0.831 (0.562,1.23)  | 0.356  |
| 8  |                          |                     |        |                     |        |
| 9  | BMI (kg/m <sup>2</sup> ) |                     |        |                     |        |
| 10 |                          |                     |        |                     |        |
| 11 | <18.5                    | 0.628 (0.464,0.852) | 0.003  | 0.78 (0.565,1.078)  | 0.132  |
| 12 |                          |                     |        |                     |        |
| 13 | 18.5-23.9                | Reference           |        | Reference           |        |
| 14 |                          |                     |        |                     |        |
| 15 | ≥24                      | 1.409 (1.272,1.561) | <0.001 | 1.157 (1.031,1.299) | 0.013  |
| 16 |                          |                     |        |                     |        |
| 17 |                          |                     |        |                     |        |
| 18 | Smoking                  |                     |        |                     |        |
| 19 |                          |                     |        |                     |        |
| 20 | Frequent                 | Reference           |        | Reference           |        |
| 21 |                          |                     |        |                     |        |
| 22 | Infrequent               | 0.446 (0.397,0.502) | <0.001 | 0.502 (0.44,0.572)  | <0.001 |
| 23 |                          |                     |        |                     |        |
| 24 | Never                    | 0.335 (0.293,0.383) | <0.001 | 0.374 (0.322,0.434) | <0.001 |
| 25 |                          |                     |        |                     |        |
| 26 |                          |                     |        |                     |        |
| 27 | Family history           |                     |        |                     |        |
| 28 |                          |                     |        |                     |        |
| 29 | No                       | Reference           |        | Reference           |        |
| 30 |                          |                     |        |                     |        |
| 31 | Yes                      | 0.485 (0.437,0.539) | <0.001 | 1.4 (1.247,1.571)   | <0.001 |
| 32 |                          |                     |        |                     |        |
| 33 |                          |                     |        |                     |        |
| 34 | Comorbidity              |                     |        |                     |        |
| 35 |                          |                     |        |                     |        |
| 36 | No                       | Reference           |        | Reference           |        |
| 37 |                          |                     |        |                     |        |
| 38 |                          |                     |        |                     |        |
| 39 |                          |                     |        |                     |        |
| 40 |                          |                     |        |                     |        |
| 41 |                          |                     |        |                     |        |
| 42 |                          |                     |        |                     |        |
| 43 |                          |                     |        |                     |        |
| 44 |                          |                     |        |                     |        |
| 45 |                          |                     |        |                     |        |
| 46 |                          |                     |        |                     |        |

1  
2  
3  
4  
5 Yes 3.185 (2.854,3.555) <0.001 2.646 (2.351,2.977) <0.001  
6  
7  
8  
9  
10  
11  
12  
13  
14  
15  
16  
17  
18  
19  
20  
21  
22  
23  
24  
25  
26  
27  
28  
29  
30  
31  
32  
33  
34  
35  
36  
37  
38  
39  
40  
41  
42  
43  
44  
45  
46

---

For peer review only



**Table S11.** Univariable and multivariable logistic regressions for reaching the target blood pressure among cardiologists taking antihypertensive drugs

| Variable        | Univariable logistic regression |        | Multivariable logistic regression |       |
|-----------------|---------------------------------|--------|-----------------------------------|-------|
|                 | OR (95%CI)                      | P      | OR (95%CI)                        | P     |
| Age             |                                 |        |                                   |       |
| 20-29           | Reference                       |        | Reference                         |       |
| 30-39           | 0.824 (0.62,1.096)              | 0.183  | 0.689 (0.418,1.138)               | 0.146 |
| 40-49           | 0.761 (0.574,1.009)             | 0.058  | 0.667 (0.391,1.138)               | 0.137 |
| 50-59           | 0.518 (0.375,0.716)             | <0.001 | 0.465 (0.262,0.825)               | 0.009 |
| ≥60             | 0.655 (0.424,1.012)             | 0.057  | 0.549 (0.286,1.055)               | 0.072 |
| Gender          |                                 |        |                                   |       |
| Male            | Reference                       |        | Reference                         |       |
| Female          | 1.204 (1.012,1.432)             | 0.036  | 1.081 (0.896,1.304)               | 0.415 |
| Academic degree |                                 |        |                                   |       |
| Junior college  | Reference                       |        |                                   |       |

|                     |                     |       |                     |       |
|---------------------|---------------------|-------|---------------------|-------|
| Bachelor            | 0.457 (0.172,1.211) | 0.115 |                     |       |
| Master              | 0.483 (0.182,1.282) | 0.144 |                     |       |
| Doctor              | 0.484 (0.179,1.306) | 0.152 |                     |       |
| Post-doctor         | 0.591 (0.198,1.762) | 0.345 |                     |       |
| Others              | 0.791 (0.286,2.192) | 0.652 |                     |       |
| Hospital level      |                     |       |                     |       |
| Primary             | Reference           |       | Reference           |       |
| Secondary           | 2.845 (1.29,6.275)  | 0.010 | 2.878 (1.287,6.438) | 0.01  |
| Tertiary            | 2.573 (1.171,5.655) | 0.019 | 2.558 (1.147,5.704) | 0.022 |
| Others              | 2.578 (0.863,7.701) | 0.090 | 2.179 (0.714,6.646) | 0.171 |
| Professional title  |                     |       |                     |       |
| General physician   | Reference           |       | Reference           |       |
| Healer              | 1.308 (0.681,2.514) | 0.420 | 1.697 (0.8,3.603)   | 0.168 |
| Resident physician  | 1.956 (1.167,3.28)  | 0.011 | 2.768 (1.467,5.225) | 0.002 |
| Attending physician | 1.187 (0.856,1.646) | 0.304 | 1.585 (0.982,2.558) | 0.059 |

|    |                           |                     |        |                     |        |
|----|---------------------------|---------------------|--------|---------------------|--------|
| 1  |                           |                     |        |                     |        |
| 2  |                           |                     |        |                     |        |
| 3  |                           |                     |        |                     |        |
| 4  |                           |                     |        |                     |        |
| 5  | Associate chief physician | 0.845 (0.596,1.196) | 0.341  | 1.271 (0.747,2.16)  | 0.376  |
| 6  |                           |                     |        |                     |        |
| 7  | Chief physician           | 0.947 (0.655,1.369) | 0.772  | 1.623 (0.928,2.837) | 0.089  |
| 8  |                           |                     |        |                     |        |
| 9  | Others                    | 1.65 (1.081,2.519)  | 0.020  | 1.599 (1.036,2.469) | 0.034  |
| 10 |                           |                     |        |                     |        |
| 11 | BMI (kg/m <sup>2</sup> )  |                     |        |                     |        |
| 12 |                           |                     |        |                     |        |
| 13 | <18.5                     | 0.973 (0.566,1.673) | 0.922  | 0.872 (0.5,1.521)   | 0.629  |
| 14 |                           |                     |        |                     |        |
| 15 | 18.5-23.9                 | Reference           |        | Reference           |        |
| 16 |                           |                     |        |                     |        |
| 17 | ≥24                       | 0.621 (0.524,0.738) | <0.001 | 0.657 (0.548,0.787) | <0.001 |
| 18 |                           |                     |        |                     |        |
| 19 |                           |                     |        |                     |        |
| 20 | Smoking                   |                     |        |                     |        |
| 21 |                           |                     |        |                     |        |
| 22 | Frequent                  | Reference           |        |                     |        |
| 23 |                           |                     |        |                     |        |
| 24 | Infrequent                | 0.936 (0.777,1.128) | 0.489  |                     |        |
| 25 |                           |                     |        |                     |        |
| 26 | Never                     | 1.022 (0.819,1.275) | 0.848  |                     |        |
| 27 |                           |                     |        |                     |        |
| 28 | Family history            |                     |        |                     |        |
| 29 |                           |                     |        |                     |        |
| 30 | No                        | Reference           |        |                     |        |
| 31 |                           |                     |        |                     |        |
| 32 | Yes                       | 1.445 (1.219,1.713) | <0.001 | 0.746 (0.624,0.891) | 0.001  |
| 33 |                           |                     |        |                     |        |
| 34 | Comorbidity               |                     |        |                     |        |
| 35 |                           |                     |        |                     |        |
| 36 |                           |                     |        |                     |        |
| 37 |                           |                     |        |                     |        |
| 38 |                           |                     |        |                     |        |
| 39 |                           |                     |        |                     |        |
| 40 |                           |                     |        |                     |        |
| 41 |                           |                     |        |                     |        |
| 42 |                           |                     |        |                     |        |
| 43 |                           |                     |        |                     |        |
| 44 |                           |                     |        |                     |        |
| 45 |                           |                     |        |                     |        |
| 46 |                           |                     |        |                     |        |

|     |                    |       |                    |       |
|-----|--------------------|-------|--------------------|-------|
| No  | Reference          |       |                    |       |
| Yes | 0.811 (0.685,0.96) | 0.015 | 0.811 (0.679,0.97) | 0.022 |

---

For peer review only

**CCHS****QUESTIONNAIRE**

China Cardiologist Heart Study

**FORM**

**INSTRUCTIONS:** This collection of information is estimated to average 10 minutes. Name and contact information must be entered above. Please enter the number so that the last digit appears in the rightmost box. Enter leading zeros where necessary to fill all boxes. For "multiple choice" and "yes/no" type questions, circle the letter corresponding to the most appropriate response. If a letter is circled incorrectly, mark through it with an "X" and circle the correct response.

**CCHS Center use only**Sequence Number 

1. Name: \_\_\_\_\_

2. Date of birth: /\_\_\_\_/\_\_\_\_(yyyy/mm)

3. Contact phone number: \_\_\_\_\_

4. Employer: Hospital name, district/county, city, province/municipality \_\_\_\_\_

**A. Personal information**1. Hospital level: 

2. Professional title: \_\_\_\_\_

3. Academic degree: \_\_\_\_\_

4. Area of expertise (multiple choices available):

- |                                                                  |                                                             |
|------------------------------------------------------------------|-------------------------------------------------------------|
| <input type="radio"/> Atherosclerosis and coronary heart disease | <input type="radio"/> Hypertension                          |
| <input type="radio"/> Arrhythmia and electrophysiology           | <input type="radio"/> Blood lipid metabolism                |
| <input type="radio"/> Congenital heart disease                   | <input type="radio"/> Heart failure                         |
| <input type="radio"/> Pulmonary vascular disease                 | <input type="radio"/> Structural heart disease              |
| <input type="radio"/> Female cardiovascular disease              | <input type="radio"/> Senile cardiovascular disease         |
| <input type="radio"/> Basic-clinical combination                 | <input type="radio"/> Cardiovascular imaging                |
| <input type="radio"/> Interventional cardiology                  | <input type="radio"/> Cardiac intensive care and monitoring |
| <input type="radio"/> Others                                     |                                                             |

**B. Survey information**1. Gender:  Male  Female2. Height: cm3. Weight: kg

1  
2  
3 4. Are you currently taking the following medications? (multiple choices available)

- 4 ○ Antihypertensive drugs
- 5 ○ Lipid-regulation drugs
- 6 ○ Hypoglycemic agents
- 7 ○ None
- 8
- 9

10  
11 5. Do you have any of the following clinical conditions? (multiple choices available)

- 12 ○ None
- 13 ○ Coronary heart disease
- 14 ○ Heart failure
- 15 ○ Diabetes
- 16 ○ Chronic kidney disease
- 17 ○ Peripheral vascular disease
- 18 ○ Stroke/transient ischemic attack
- 19
- 20
- 21
- 22
- 23
- 24

25 6. Did you smoke  $\geq 1$  cigarette per day in the past 3 months?

- 26 ○ Yes
- 27 ○ No
- 28 ○ Never smoked
- 29
- 30

31 7. Do you have a first-degree male relative who suffered from a cardiovascular disease at <55  
32 years of age or a first-degree female relative who suffered from a cardiovascular disease at <65  
33 years of age?  
34

- 35 ○ No
- 36 ○ Yes
- 37
- 38
- 39
- 40
- 41

42 **C. Blood Pressure** (Please record the data in the last 2 weeks, If don't know, please fill in 999)

- 43 1. Average sitting systolic blood pressure: □□□mmHg
- 44 2. Average sitting diastolic blood pressure: □□□mmHg
- 45 3. Average heart rate: □□□bpm
- 46
- 47
- 48
- 49
- 50

51 **D. Laboratory** (Please record the data of the most recent results within a year, If don't know,  
52 please fill in 999)

- 53 1. Fasting blood glucose: □□.□mmol/L
- 54 2. Total cholesterol (TC): □□.□mmol/L or □□□.□mg/dL
- 55 3. Low density lipoprotein-cholesterol (LDL-C): □□.□mmol/L or □□□.□mg/dL
- 56 4. High density lipoprotein-cholesterol (HDL-C): □□.□mmol/L or □□□.□mg/dL
- 57
- 58
- 59
- 60

1  
2  
3  
4  
5  
6  
7  
8  
9  
10  
11  
12  
13  
14  
15  
16  
17  
18  
19  
20  
21  
22  
23  
24  
25  
26  
27  
28  
29  
30  
31  
32  
33  
34  
35  
36  
37  
38  
39  
40  
41  
42  
43  
44  
45  
46  
47  
48  
49  
50  
51  
52  
53  
54  
55  
56  
57  
58  
59  
60

5. Triglyceride (TG):   .  mmol/L or    .  mg/dL

**Thank you very much for your help!**

For peer review only

**STROBE Statement**

## Checklist of items that should be included in reports of observational studies

| Section/Topic                                                                                      | Item No | Recommendation                                                                                                                                                                             | Reported on Page No |
|----------------------------------------------------------------------------------------------------|---------|--------------------------------------------------------------------------------------------------------------------------------------------------------------------------------------------|---------------------|
| <b>Title and abstract</b>                                                                          | 1       | (a) Indicate the study's design with a commonly used term in the title or the abstract                                                                                                     | 1                   |
|                                                                                                    |         | (b) Provide in the abstract an informative and balanced summary of what was done and what was found                                                                                        | 2-3                 |
| <b>Introduction</b>                                                                                |         |                                                                                                                                                                                            |                     |
| Background/rationale                                                                               | 2       | Explain the scientific background and rationale for the investigation being reported                                                                                                       | 4-5                 |
| Objectives                                                                                         | 3       | State specific objectives, including any prespecified hypotheses                                                                                                                           | 5                   |
| <b>Methods</b>                                                                                     |         |                                                                                                                                                                                            |                     |
| Study design                                                                                       | 4       | Present key elements of study design early in the paper                                                                                                                                    | 5                   |
| Setting                                                                                            | 5       | Describe the setting, locations, and relevant dates, including periods of recruitment, exposure, follow-up, and data collection                                                            | 5                   |
| Participants                                                                                       | 6       | (a) <i>Cohort study</i> —Give the eligibility criteria, and the sources and methods of selection of participants. Describe methods of follow-up                                            | 5                   |
|                                                                                                    |         | <i>Case-control study</i> —Give the eligibility criteria, and the sources and methods of case ascertainment and control selection. Give the rationale for the choice of cases and controls |                     |
|                                                                                                    |         | <i>Cross-sectional study</i> —Give the eligibility criteria, and the sources and methods of selection of participants                                                                      |                     |
| Variables                                                                                          | 7       | (b) <i>Cohort study</i> —For matched studies, give matching criteria and number of exposed and unexposed                                                                                   | 5                   |
|                                                                                                    |         | <i>Case-control study</i> —For matched studies, give matching criteria and the number of controls per case                                                                                 |                     |
| Data sources/measurement                                                                           | 8*      | Clearly define all outcomes, exposures, predictors, potential confounders, and effect modifiers. Give diagnostic criteria, if applicable                                                   | 5                   |
| Bias                                                                                               | 9       | For each variable of interest, give sources of data and details of methods of assessment (measurement). Describe comparability of assessment methods if there is more than one group       | 6                   |
| Study size                                                                                         | 10      | Describe any efforts to address potential sources of bias                                                                                                                                  | 6                   |
| Quantitative variables                                                                             | 11      | Explain how the study size was arrived at                                                                                                                                                  | 6                   |
| Statistical methods                                                                                | 12      | Explain how quantitative variables were handled in the analyses. If applicable, describe which groupings were chosen and why                                                               | 6                   |
|                                                                                                    |         | (a) Describe all statistical methods, including those used to control for confounding                                                                                                      | 7                   |
|                                                                                                    |         | (b) Describe any methods used to examine subgroups and interactions                                                                                                                        | 7                   |
|                                                                                                    |         | (c) Explain how missing data were addressed                                                                                                                                                | 7                   |
|                                                                                                    |         | (d) <i>Cohort study</i> —If applicable, explain how loss to follow-up was addressed                                                                                                        | 7                   |
| <i>Case-control study</i> —If applicable, explain how matching of cases and controls was addressed |         |                                                                                                                                                                                            |                     |
|                                                                                                    |         | <i>Cross-sectional study</i> —If applicable, describe analytical methods taking account of sampling strategy                                                                               | 7                   |
|                                                                                                    |         | (e) Describe any sensitivity analyses                                                                                                                                                      | 7                   |



| Section/Topic            | Item No | Recommendation                                                                                                                                                                                               | Reported on Page No |
|--------------------------|---------|--------------------------------------------------------------------------------------------------------------------------------------------------------------------------------------------------------------|---------------------|
| <b>Results</b>           |         |                                                                                                                                                                                                              |                     |
| Participants             | 13*     | (a) Report numbers of individuals at each stage of study—eg numbers potentially eligible, examined for eligibility, confirmed eligible, included in the study, completing follow-up, and analysed            | 8                   |
|                          |         | (b) Give reasons for non-participation at each stage                                                                                                                                                         |                     |
|                          |         | (c) Consider use of a flow diagram                                                                                                                                                                           |                     |
| Descriptive data         | 14*     | (a) Give characteristics of study participants (eg demographic, clinical, social) and information on exposures and potential confounders                                                                     | 8                   |
|                          |         | (b) Indicate number of participants with missing data for each variable of interest                                                                                                                          |                     |
|                          |         | (c) <i>Cohort study</i> —Summarise follow-up time (eg, average and total amount)                                                                                                                             |                     |
| Outcome data             | 15*     | <i>Cohort study</i> —Report numbers of outcome events or summary measures over time                                                                                                                          |                     |
|                          |         | <i>Case-control study</i> —Report numbers in each exposure category, or summary measures of exposure                                                                                                         |                     |
|                          |         | <i>Cross-sectional study</i> —Report numbers of outcome events or summary measures                                                                                                                           | 9-11                |
| Main results             | 16      | (a) Give unadjusted estimates and, if applicable, confounder-adjusted estimates and their precision (eg, 95% confidence interval). Make clear which confounders were adjusted for and why they were included | 9-11                |
|                          |         | (b) Report category boundaries when continuous variables were categorized                                                                                                                                    |                     |
|                          |         | (c) If relevant, consider translating estimates of relative risk into absolute risk for a meaningful time period                                                                                             |                     |
| Other analyses           | 17      | Report other analyses done—eg analyses of subgroups and interactions, and sensitivity analyses                                                                                                               |                     |
| <b>Discussion</b>        |         |                                                                                                                                                                                                              |                     |
| Key results              | 18      | Summarise key results with reference to study objectives                                                                                                                                                     | 11-14               |
| Limitations              | 19      | Discuss limitations of the study, taking into account sources of potential bias or imprecision. Discuss both direction and magnitude of any potential bias                                                   | 14                  |
| Interpretation           | 20      | Give a cautious overall interpretation of results considering objectives, limitations, multiplicity of analyses, results from similar studies, and other relevant evidence                                   | 14-15               |
| Generalisability         | 21      | Discuss the generalisability (external validity) of the study results                                                                                                                                        | 14-15               |
| <b>Other Information</b> |         |                                                                                                                                                                                                              |                     |
| Funding                  | 22      | Give the source of funding and the role of the funders for the present study and, if applicable, for the original study on which the present article is based                                                | 15                  |

\*Give information separately for cases and controls in case-control studies and, if applicable, for exposed and unexposed groups in cohort and cross-sectional studies.

**Note:** An Explanation and Elaboration article discusses each checklist item and gives methodological background and published examples of transparent reporting. The STROBE checklist is best used in conjunction with this article (freely available on the Web sites of PLoS Medicine at <http://www.plosmedicine.org/>, Annals of Internal Medicine at <http://www.annals.org/>, and Epidemiology at <http://www.epidem.com/>). Information on the STROBE Initiative is available at [www.strobe-statement.org](http://www.strobe-statement.org).

# BMJ Open

## Perception and self-management of hypertension in Chinese cardiologists (CCHS): a multicenter, large-scale cross-sectional study

|                                 |                                                                                                                                                                                                                                                                                                                                                                                                                                                                                                                                                                                                                                                                                                                                                                                                                             |
|---------------------------------|-----------------------------------------------------------------------------------------------------------------------------------------------------------------------------------------------------------------------------------------------------------------------------------------------------------------------------------------------------------------------------------------------------------------------------------------------------------------------------------------------------------------------------------------------------------------------------------------------------------------------------------------------------------------------------------------------------------------------------------------------------------------------------------------------------------------------------|
| Journal:                        | <i>BMJ Open</i>                                                                                                                                                                                                                                                                                                                                                                                                                                                                                                                                                                                                                                                                                                                                                                                                             |
| Manuscript ID                   | bmjopen-2019-029249.R1                                                                                                                                                                                                                                                                                                                                                                                                                                                                                                                                                                                                                                                                                                                                                                                                      |
| Article Type:                   | Research                                                                                                                                                                                                                                                                                                                                                                                                                                                                                                                                                                                                                                                                                                                                                                                                                    |
| Date Submitted by the Author:   | 12-Jul-2019                                                                                                                                                                                                                                                                                                                                                                                                                                                                                                                                                                                                                                                                                                                                                                                                                 |
| Complete List of Authors:       | Hou, Lei ; Shanghai Institute of Cardiovascular Diseases, Zhongshan Hospital, Fudan University, Department of Cardiology; Tongren hospital, Shanghai Jiaotong University, School of Medicine, Department of Cardiology<br>Jin, Xuejuan ; Shanghai Institute of Cardiovascular Diseases, Zhongshan Hospital, Fudan University, Department of Cardiology<br>Ma, Jianying ; Shanghai Institute of Cardiovascular Diseases, Zhongshan Hospital, Fudan University, Department of Cardiology<br>Qian, Juying; Shanghai Institute of Cardiovascular Diseases, Zhongshan Hospital, Fudan University, Department of Cardiology<br>Huo, Yong ; Peking University First Hospital, Department of Cardiology<br>Ge, Junbo; Shanghai Institute of Cardiovascular Diseases, Zhongshan Hospital, Fudan University, Department of Cardiology |
| <b>Primary Subject Heading</b>: | Cardiovascular medicine                                                                                                                                                                                                                                                                                                                                                                                                                                                                                                                                                                                                                                                                                                                                                                                                     |
| Secondary Subject Heading:      | Cardiovascular medicine                                                                                                                                                                                                                                                                                                                                                                                                                                                                                                                                                                                                                                                                                                                                                                                                     |
| Keywords:                       | health survey, cardiovascular diseases, China, cardiologists, cross-sectional studies                                                                                                                                                                                                                                                                                                                                                                                                                                                                                                                                                                                                                                                                                                                                       |
|                                 |                                                                                                                                                                                                                                                                                                                                                                                                                                                                                                                                                                                                                                                                                                                                                                                                                             |

SCHOLARONE™  
Manuscripts

1  
2  
3  
4 **Perception and self-management of hypertension in Chinese cardiologists (CCHS): a**  
5 **multicenter, large-scale cross-sectional study**  
6  
7  
8  
9  
10

11 **Running title:** The China Cardiologist Heart Study  
12  
13  
14

15 Lei Hou<sup>1,2¶</sup>, Xuejuan Jin<sup>1¶</sup>, Jianying Ma<sup>1</sup>, Juying Qian<sup>1</sup>, Yong Huo<sup>3</sup>, Junbo Ge<sup>1</sup>  
16  
17  
18  
19

20 <sup>1</sup>Department of Cardiology, Shanghai Institute of Cardiovascular Diseases, Zhongshan  
21 Hospital, Fudan University, Shanghai, China  
22  
23

24 <sup>2</sup>Department of Cardiology, Tongren Hospital, Shanghai Jiaotong University, School of  
25 Medicine, Shanghai, China  
26  
27

28 <sup>3</sup>Department of Cardiology, Peking University First Hospital, Beijing, China  
29  
30

31 <sup>¶</sup>These authors contributed equally to this work.  
32  
33  
34  
35

36 **Corresponding author:** Junbo Ge, No. 180 Fenglin Road, 200032, Department of  
37 Cardiology, Shanghai Institute of Cardiovascular Diseases, Zhongshan Hospital, Fudan  
38 University, Shanghai, China. Email: gejunbo@126.com  
39  
40  
41  
42  
43  
44  
45  
46  
47  
48  
49  
50  
51  
52  
53  
54  
55  
56  
57  
58  
59  
60

## ABSTRACT

**Objectives:** To determine the frequency of risk factors for hypertension among Chinese cardiologists using a nationwide survey.

**Design:** Multicenter, cross-sectional observational study.

**Setting:** A total of 2441 hospitals across China were surveyed between September 2016 and August 2017.

**Participants:** All cardiologists in-service were surveyed (n=28,924).

**Interventions:** WeChat-based electronic data capture system, a social application in China (Tencent, Nanshan, China), was used for data acquisition. Physician subscribed to the WeChat official account of the China Cardiologist Heart Study, and filled out an online questionnaire that included age, gender, level of in-service hospital, professional title, academic degree, area of expertise, and cardiovascular risk factors. All information was required.

**Primary and secondary outcome measures:** The primary outcome was the presence of cardiovascular risk factors. The secondary outcome was the impact of factors on the occurrence of hypertension.

**Results:** Among 28,924 Chinese cardiologists who responded the questionnaire, 57.6% had blood pressure of 130-139/80-89 mmHg (5.3% were taking antihypertensive drugs) and 22.0% had blood pressure  $\geq 140/\geq 90$  mmHg (36.5% were taking antihypertensive drugs). The multivariable analysis showed that age, gender, academic degree, hospital level, body mass index (BMI), smoking, and comorbidities were independently associated with hypertension among cardiologists (all  $P < 0.05$ ). Age, female gender, BMI, smoking, family history of cardiovascular diseases, and comorbidities were independently associated with

1  
2  
3  
4 taking antihypertensive drugs among hypertensive cardiologists (all  $P < 0.05$ ). Age, hospital  
5 level, professional title, BMI, family history of cardiovascular diseases, and comorbidities  
6 were independently associated with reaching target blood pressure among hypertensive  
7 cardiologists taking antihypertensive drugs.  
8  
9  
10  
11  
12

13 **Conclusion:** Chinese cardiologists do not recognize and pay attention to their own blood  
14 pressure. Their antihypertensive treatment level was low. The identified risk factors could  
15 be used to identify cardiologists at higher risk for hypertension and for implementing  
16 preventive interventions.  
17  
18  
19  
20  
21  
22

23  
24  
25 **Keywords:** health survey; cardiovascular diseases; China; cardiologists; cross-sectional  
26 studies.  
27  
28  
29  
30  
31

### 32 **Strengths and limitations of this study**

- 33  
34 - The strength of the present study lies in its large sample size (>26,000 participants) from  
35 all across China.  
36
- 37  
38 - Because of funding and logistics, data had to be collected using a self-filled survey, which  
39 could introduce bias compared to a formal epidemiological study.  
40  
41
- 42  
43 - The medical system in China and the formation required to work in cardiology are  
44 different from that of other countries, limiting the generalizability of the data.  
45  
46
- 47  
48 - The geographical distribution of the cardiologists across China was not taken into account.  
49  
50  
51  
52  
53  
54  
55  
56  
57  
58  
59  
60

## INTRODUCTION

Cardiologists are exposed to threats to their health, resulting in an important incidence of orthopedic problems [1 2]. In addition, there is a risk of radiation-related diseases [2 3]. Besides those obvious occupational hazards, cardiologists are exposed to stress, work overload, and bad lifestyle habits that may increase their cardiovascular risk [4 5], and this holds true in Chinese cardiologists [6 7]. A study from Italy showed that the cardiovascular profile of Italian cardiologists was far from ideal and that the perception of their own risk factors was low [4 8]. The understanding and awareness of cardiologists' perception of their own health care are not only important for maintaining individual health and the manpower of the national medical health care system, but also directly affect their understanding and behaviors toward the patients, eventually having some impact on the prevention and treatment of cardiovascular diseases (CVDs). Indeed, cardiologists serve as role models for behavioral changes [9-11]. Their knowledge about CVD risk factors and their perception of how they treat their patients with CVD risk reflects also on their perception of their own risk factors [12].

Chinese physicians face a large number of patients and are at risk of job turnover [13]. A survey of Chinese cardiologists found that there were only 1.9 cardiologists per 100,000 people [6], compared with 8.1 per 100,000 people in the United States in 2009 [7]. Hence, there are heavy responsibilities and work burden for cardiologists in China. Faced with such a disparity in the proportion of cardiologists and patients, the working time of Chinese doctors usually exceeds the standard working time [14]. All of those factors may lead to an increase in the incidence of cardiovascular risk factors and diseases among Chinese cardiologists. Indeed, when comparing the Physicians' Health Study from the United States

1  
2  
3  
4 with the Chinese Cardiovascular Risk Evaluation (CARE) study [15 16], it was found that  
5  
6 the prevalence of cardiovascular risk factors among Chinese cardiologists was higher than  
7  
8 among American physicians, and that Chinese cardiologists had a poor perception of their  
9  
10 own cardiovascular risk factors. Hypertension is a major risk factor for cardiovascular  
11  
12 diseases and death in China [17] and in the world in general [18 19]. Hypertension may  
13  
14 arise due to adverse life style habits (tobacco, alcohol, caffeine, salty foods) [20], but also  
15  
16 from chronic stress, work pressure, and lack of sleep [21-25].  
17  
18

19  
20 A recent anecdotic observation is that sudden death was observed in many young Chinese  
21  
22 cardiologists, prompting the hypothesis that Chinese cardiologists may neglect their own  
23  
24 health. In addition, as stated above, Chinese cardiologists are likely to display risk factors  
25  
26 of hypertension, which will have a certain impact on their health. Nevertheless, the factors  
27  
28 for poor cardiovascular factors among cardiologists must first be identified and understood  
29  
30 before interventions may be implemented. Therefore, the present study aimed to examine  
31  
32 the risk factors for hypertension among Chinese cardiologists using a nationwide survey.  
33  
34  
35  
36  
37  
38

## 39 **SUBJECTS AND METHODS**

### 40 **Participants**

41  
42 This was a national, multicenter, cross-sectional observational study. Cardiologists from  
43  
44 2441 hospitals across China were surveyed between September 2016 and August 2017. All  
45  
46 cardiologists in-service were eligible. If a hospital did not have a department of cardiology  
47  
48 and only had a department of internal medicine, then the internists engaged in the  
49  
50 cardiovascular field were included. Physicians who were unwilling to participate in this  
51  
52 survey were excluded. This study was approved by the Ethics Committee of Tongren  
53  
54  
55  
56  
57  
58  
59  
60

1  
2  
3  
4 Hospital, Shanghai Jiaotong University, School of Medicine (approval number: 2015-017-  
5  
6 01). All physicians signed the informed consent form.  
7

### 8 9 **Sampling method**

10 Due to the funding and lack of manpower, it was difficult to design a sampling frame  
11 according to economic levels and hospital levels and randomly select hospitals nationwide.  
12 Hence, the study used a two-stage sampling process, selecting hospitals using non-random  
13 stratification according to regional economic levels and hospital levels during the first stage.  
14 In the second stage, a random proportional sample from authoritative lists was created, and  
15 all the cardiologists in this sample of hospitals were invited to participate in the study.  
16  
17  
18  
19  
20  
21  
22  
23  
24

### 25 **Questionnaire**

26 The study was performed and coordinated under the guidance of a scientific advisory board.  
27 Data quality was monitored by the study coordinators throughout the study.  
28  
29 WeChat-based electronic data capture (EDC) system, a social application in China (Tencent,  
30 Nanshan, China), was used for data acquisition. Physician subscribed to the WeChat  
31 official account of the China Cardiologist Heart Study (Wuxi Boyankang Technology  
32 Development Co., Ltd. was responsible for platform construction and data management),  
33 and filled out an online questionnaire that included age, gender, level of in-service hospital,  
34 professional title (general physicians were those with a bachelor degree; healer were those  
35 with a junior college degree or below), academic degree, area of expertise, height, body  
36 weight, blood pressure, heart rate, fasting blood glucose, total cholesterol (TC), low density  
37 lipoprotein-cholesterol (LDL-C), high density lipoprotein-cholesterol (HDL-C), triglyceride  
38 (TG), current diseases, medication status, smoking history, and family history. The  
39 questions about area of expertise and current diseases had multiple choices. All information  
40  
41  
42  
43  
44  
45  
46  
47  
48  
49  
50  
51  
52  
53  
54  
55  
56  
57  
58  
59  
60



1  
2  
3  
4 was required. The questionnaire with incomplete information could not be submitted. At  
5  
6 the same time, there were logically possible upper and lower limits for the content to be  
7  
8 filled in. If the limit was exceeded, it could indicate that the data was incorrect. The staff of  
9  
10 the project team would remind the physician to check. The questionnaire was shown in  
11  
12 Appendix 1.  
13  
14

### 15 **Data collection**

16  
17 Demographic variables and risk factors for CVD were assessed according to standardized  
18  
19 study protocols. Age was automatically generated based on the birth date. Blood pressure  
20  
21 and heart rate were the average levels over the past 2 weeks. Fasting blood glucose and  
22  
23 blood lipids were reviewed by the physician for the most recent results within a year. Body  
24  
25 mass index (BMI) was calculated based on weight and height as  $\text{kg/m}^2$ . Hypertension was  
26  
27 defined as systolic blood pressure  $\geq 140$  mmHg or diastolic blood pressure  $\geq 90$  mmHg or  
28  
29 taking antihypertensive drugs. Reaching the target blood pressure was defined as systolic  
30  
31 blood pressure  $< 140$  mmHg and diastolic blood pressure  $< 90$  mmHg. Smoking history was  
32  
33 defined as at least one cigarette/day in the past 3 months (yes, no, never smoking). Family  
34  
35 history was defined as first-degree male relative with a CVD at  $< 55$  years of age or a first-  
36  
37 degree female relative with a CVD at  $< 65$  years of age.  
38  
39  
40  
41  
42

### 43 **Statistical analysis**

44  
45 All data were statistically analyzed using SPSS 22.0 (IBM, Armonk, NY, USA).  
46  
47 Continuous variables that followed the normal distribution were expressed as means  $\pm$   
48  
49 standard deviation (SD), and skewed continuous variables were summarized as medians  
50  
51 (interquartile range). Categorical variables were expressed as frequencies (percentage) and  
52  
53 chi-square tests were used for comparison between groups. Univariable and multivariable  
54  
55  
56  
57  
58  
59  
60

1  
2  
3  
4 logistic regression analyses were used to analyze the factors influencing the prevalence of  
5  
6 hypertension, rate of medicine taking, and rate of reaching the target blood pressure. For  
7  
8 the multivariable analysis, comorbidity was defined as the presence of any other disease, or  
9  
10 taking antidiabetic or lipid-lowering drugs. Two-sided  $P < 0.05$  was considered as  
11  
12 statistically significant.  
13  
14

### 15 **Patient and Public Involvement statement**

16 Patients were not involved in the study design and implementation.  
17  
18  
19  
20  
21

## 22 **RESULTS**

### 23 **Characteristics of the participants**

24  
25 A total of 30,000 cardiologists across China were invited to participate in this survey, and  
26  
27 28,924 filled the questionnaire, for a response rate of 96.4%. Tables 1, 2 and  
28  
29 Supplementary Table S1 present their characteristics. Most (42.7%) were 30-39 years old,  
30  
31 male (54.5%), with a bachelor degree (43.9%), working in a tertiary hospital (60.1%), and  
32  
33 were attending physicians (46.5%). Their main areas of expertise were: hypertension  
34  
35 (63.9%), atherosclerosis and coronary artery diseases (51.1%), blood lipids and metabolism  
36  
37 (35.1%), and heart failure (31.4%). Most had a BMI of 18.5-23.9 kg/m<sup>2</sup> (66.7%), fasting  
38  
39 blood glucose  $< 6.1$  mmol/L (90.0%), LDL-C  $< 2.60$  mmol/L (44.6%), HDL-C  $\geq 1.0$  mmol/L  
40  
41 (93.5%), TC  $< 5.2$  mmol/L (86.3%), and TG  $< 1.7$  mmol/L (53.8%). Among them, 57.6%  
42  
43 had blood pressure of 130-139/80-89 mmHg (5.3% were taking antihypertensive drugs) and  
44  
45 22.0% had blood pressure  $\geq 140/\geq 90$  mmHg (36.5% were taking antihypertensive drugs).  
46  
47 Among all cardiologists, 37.0% never smoked, 78.2% had a family history of CVDs, 25.3%  
48  
49 had hypertension, and 8.0% were taking antihypertensive drugs.  
50  
51  
52  
53  
54  
55  
56  
57  
58  
59  
60

### **Gender differences in the prevalence of hypertension in Chinese cardiologists**

Hypertension was more prevalent in male cardiologists than in females ( $P<0.001$ ) (Table 3). More male cardiologists were taking antihypertensive drugs (33.5% vs. 28.8%,  $P<0.001$ ), but more female cardiologists achieved the target blood pressure (44.3% vs. 39.8%,  $P=0.036$ ).

### **Age differences in the prevalence of hypertension in Chinese cardiologists**

Table 4 shows that hypertension was more prevalent in the older age groups ( $P<0.001$ ). The highest proportions of cardiologists taking antihypertensive drugs were in the 50-59 (42.0%) and 60-69 (48.8%) years of age groups. The highest proportions of cardiologists reaching the target blood pressure were in the 20-29 (48.4%), 30-39 (43.6%), and 40-49 (41.7%) years of age groups. Supplementary Tables S2 and S3 show that similar patterns were observed when the analyses were performed by gender.

### **Hospital level differences in the prevalence of hypertension in Chinese cardiologists**

Table 5 shows that the prevalence of hypertension was higher in primary hospitals (35.7%) compared with secondary (24.9%) and tertiary (25.4%) hospitals ( $P<0.001$ ). The proportions of cardiologists taking antihypertensive drugs and reaching the target blood pressure were higher in secondary and tertiary hospitals (both  $P<0.05$ ). Similar patterns could be observed when analyzing male and female cardiologists (Supplementary Tables S4 and S5).

### **Professional title differences in the prevalence of hypertension in Chinese cardiologists**

Hypertension was more prevalent in associate chief physicians and chief physicians ( $P<0.001$ ), with a correspondingly higher proportion of cardiologists taking

1  
2  
3  
4 antihypertensive drugs ( $P<0.001$ ). Residents, healers, and attending physicians had the  
5  
6 highest proportions of cardiologists achieving the target blood pressure ( $P<0.001$ )  
7  
8 (Supplementary Table S6). Globally, similar patterns were observed when analyzing the  
9  
10 data by male and female cardiologists (Supplementary Tables S7 and S8).  
11  
12

### 13 **Factors associated with hypertension among cardiologists**

14  
15 Table S9 presents the univariable and multivariable analyses of the factors associated with  
16  
17 hypertension among Chinese cardiologists. Age (50-59 years: odds ratio [OR]=1.397, 95%  
18  
19 confidence interval [CI]: 1.164-1.678,  $P<0.001$ ;  $\geq 60$  years: OR=1.949, 95%CI: 1.534-2.476,  
20  
21  $P<0.001$  vs. 20-29 years), female gender (OR=0.866, 95%CI: 0.813-0.924,  $P<0.001$  vs.  
22  
23 male), academic degree (bachelor: OR=0.629, 95%CI: 0.461-0.859,  $P=0.004$ ; master:  
24  
25 OR=0.722, 95%CI: 0.528-0.988,  $P=0.04$  vs. junior college), hospital level (secondary:  
26  
27 OR=0.582, 95%CI: 0.464-0.728,  $P<0.001$ ; tertiary: OR=0.579, 95%CI: 0.463-0.724,  
28  
29  $P<0.001$  vs. primary), BMI ( $\geq 24$  kg/m<sup>2</sup>: OR=1.314, 95%CI: 1.233-1.400,  $P<0.001$  vs. 18.5-  
30  
31 23.9 kg/m<sup>2</sup>), smoking (infrequent: OR=0.568, 95%CI: 0.525-0.613,  $P<0.001$ ; never:  
32  
33 OR=0.469, 95%CI: 0.431-0.509,  $P<0.001$  vs. frequent), and comorbidities (OR=3.158,  
34  
35 95%CI: 2.924-3.410,  $P<0.001$ ) were independently associated with hypertension among  
36  
37 cardiologists.  
38  
39  
40  
41  
42

### 43 **Factors associated with taking antihypertensive drugs among hypertensive** 44 45 **cardiologists**

46  
47 Table S10 presents the univariable and multivariable analyses of the factors associated with  
48  
49 taking antihypertensive drugs among hypertensive cardiologists. Age (30-39 years:  
50  
51 OR=1.433, 95%CI: 1.055-1.945,  $P=0.02$ ; 40-49 years: OR=1.989, 95%CI: 1.428-2.771,  
52  
53  $P<0.001$ ; 50-59 years: OR=2.282, 95%CI: 1.599-3.257,  $P<0.001$ ;  $\geq 60$  years: OR=2.677,  
54  
55  
56  
57  
58  
59  
60

95%CI: 1.754-4.086,  $P < 0.001$  vs. 20-29 years), female gender (OR=1.200, 95%CI: 1.059-1.359,  $P = 0.004$  vs. male), BMI ( $\geq 24$  kg/m<sup>2</sup>: OR=1.157, 95%CI: 1.031-1.299,  $P = 0.01$  vs. 18.5-23.9 kg/m<sup>2</sup>), smoking (infrequent: OR=0.502, 95%CI: 0.440-0.572,  $P < 0.001$ ; never: OR=0.374, 95%CI: 0.322-0.434,  $P < 0.001$  vs. frequent), family history of CVDs (OR=1.400, 95%CI: 1.247-1.571,  $P < 0.001$ ), and comorbidities (OR=2.646, 95%CI: 2.351-2.977,  $P < 0.001$ ) were independently associated with taking antihypertensive drugs among hypertensive cardiologists.

### **Factors associated with reaching target blood pressure among hypertensive cardiologists taking antihypertensive drugs**

Table S11 presents the univariable and multivariable analyses of the factors associated with reaching target blood pressure among hypertensive cardiologists taking antihypertensive drugs. Age (50-59 years: OR=0.465, 95%CI: 0.262-0.825,  $P = 0.009$  vs. 20-29 years), hospital level (secondary: OR=2.878, 95%CI: 1.287-6.438,  $P = 0.01$ ; tertiary: OR=2.558, 95%CI: 1.147-5.704,  $P = 0.02$  vs. primary), professional title (residents: OR=2.768, 95%CI: 1.467-5.225,  $P = 0.002$  vs. general physicians), BMI ( $\geq 24$  kg/m<sup>2</sup>: OR=0.657, 95%CI: 0.548-0.787,  $P < 0.001$  vs. 18.5-23.9 kg/m<sup>2</sup>), family history of CVDs (OR=0.746, 95%CI: 0.624-0.891,  $P = 0.001$ ), and comorbidities (OR=0.811, 95%CI: 0.679-0.970,  $P = 0.02$ ) were independently associated with reaching target blood pressure among hypertensive cardiologists taking antihypertensive drugs.

## **DISCUSSION**

Chinese cardiologists have a poor knowledge of their own cardiovascular risk factors. The present study aimed to examine the risk factors for hypertension among Chinese

1  
2  
3  
4 cardiologists using a nationwide survey. The results suggest that Chinese cardiologists do  
5  
6 not recognize and pay attention to their own blood pressure. Their antihypertensive  
7  
8 treatment level was low. The identified risk factors could be used to identify cardiologists  
9  
10 at higher risk for hypertension and for implementing preventive interventions.  
11  
12

13  
14 In China, the prevalence of hypertension is around 24% [26-28], leading to a significant  
15  
16 cardiovascular burden [29]. In the present study, the prevalence of hypertension was 25.3%,  
17  
18 similar to the prevalence in the general Chinese population. A previous survey of  
19  
20 cardiologists conducted in 2011 revealed participants' characteristics that were similar to  
21  
22 those of the present study [6], further supporting the representativeness of our sample. Of  
23  
24 course, there is a certain overlap between the samples of the two studies, but the exact  
25  
26 extent of this overlap cannot be confirmed.  
27  
28

29  
30 In the present study, 57.6% of the cardiologists had borderline or at-risk blood pressure  
31  
32 (130-139/80-89 mmHg) and only 5.3% were taking antihypertensive drugs. In addition,  
33  
34 22.0% had blood pressure  $\geq 140/\geq 90$  mmHg, but only 36.5% were taking antihypertensive  
35  
36 drugs. Despite the expected health knowledge in physicians compared with the general  
37  
38 population, this rate of treatment was surprisingly not better than in the general Chinese  
39  
40 population [30 31]. The SOCRATES study showed that the rate of using lipid-lowering,  
41  
42 antihypertensive, and cardiovascular drugs was low among Italian cardiologists [8],  
43  
44 supporting the present study. Combined data from the Chinese (CHARLS study) and the  
45  
46 American (NHANES study) general populations indicate that China had lower rates of  
47  
48 hypertension treatment than the USA [27]. This is also supported by the CARE study,  
49  
50 which showed that physicians had suboptimal awareness of their own cardiovascular risk,  
51  
52 as well as suboptimal use of prophylaxis [15 16], and by the SOCRATES study, which  
53  
54  
55  
56  
57  
58  
59  
60

1  
2  
3  
4 showed that the self-awareness of cardiologists' own cardiovascular risk factors was mild  
5  
6 [8]. On the other hand, Abuissa et al. [32] showed that American cardiologists had  
7  
8 generally good lifestyle habits.  
9

10  
11 Age, gender, BMI, smoking, family history of CVDs, and comorbidities are well-known  
12  
13 factors for the risk of having hypertension, compliance to treatment, and/or achieving the  
14  
15 target blood pressure across the globe [33-35]. Aboyans et al. [11] showed that the  
16  
17 awareness and management of smoking cessation strategies among smoking French  
18  
19 cardiologists were low. In the present study, age, gender, BMI, smoking, family history of  
20  
21 CVDs were associated with the risk of having hypertension and with the risk of not taking  
22  
23 the proper antihypertensive medication and the risk of not achieving the target blood  
24  
25 pressure. Even if age, gender, and comorbidities are non-modifiable risk factors, they could  
26  
27 help identify cardiologists in need of more efforts for seeking the proper cardiovascular  
28  
29 treatments. This is supported by previous studies in various populations [30 36 37].  
30  
31  
32  
33

34  
35 Great efforts are necessary to become a cardiologist in Western countries, but differences in  
36  
37 the Chinese medical system make that less efforts are necessary to become a cardiologist in  
38  
39 China, a situation that is currently being corrected [6 38-40]. The present study suggests  
40  
41 that having a bachelor or master degree led to lower risk of hypertension compared with  
42  
43 junior college level. This could be due to the fact that people with more advanced training  
44  
45 possess more skills and knowledge, leading to less stress in their work. In addition, they  
46  
47 have higher income, decreasing the need for working long and stressful hours. This is  
48  
49 supported by a study that showed that physicians with a low education level had poor  
50  
51 quality of life in China [14]. As more experienced physicians can have access to more  
52  
53 advanced hospitals, we observed that cardiologists working in secondary and tertiary  
54  
55  
56  
57  
58  
59  
60

1  
2  
3  
4 hospitals had a lower risk of having hypertension. This could be due to a better awareness  
5  
6 of health knowledge in general, but also to the better material and human resources in more  
7  
8 advanced hospitals, hereby lowering stress and workload [14 41]. Workload was not  
9  
10 directly collected in the present study, but previous studies reported that it is higher in  
11  
12 China than in the USA, with 1.9 vs. 8.1 cardiologists per 100,000 people [6 7]. Considering  
13  
14 the large sample size in the present study, it is probable that our study population follows  
15  
16 the national trend. One study showed that the working hours of American physicians were  
17  
18 decreasing over the years [42]. It has been shown that working long hours was associated  
19  
20 with an increased cardiovascular risk [43]. Better knowledge and lower stress/workload can  
21  
22 also be associated with being properly treated or not for hypertension and taking the proper  
23  
24 steps, both on the medical and lifestyle points of view, to achieve the blood pressure targets,  
25  
26 as observed in the present study. This is supported by a number of studies in the Chinese  
27  
28 general population [30 31 44 45].  
29  
30  
31  
32  
33

34 The strength of the present study lies in its large sample size (>26,000 participants) from all  
35  
36 across China. On the other hand, because of funding and logistics, data had to be collected  
37  
38 using a self-filled survey, which could introduce bias compared to a formal epidemiological  
39  
40 study. In addition, the survey was filled only by the cardiologists willing to do so. Some  
41  
42 physicians could be tempted to provide data that are better than the reality. Nevertheless,  
43  
44 the prevalence of hypertension (based on the composite variable made of blood pressure  
45  
46 and antihypertensive drugs, not on a formal inquiry about a diagnosis of hypertension) was  
47  
48 similar to that of the general population of China, suggesting data validity. Of course, the  
49  
50 medical system in China and the formation required to work in cardiology are different  
51  
52 from that of other countries [6 38], limiting the generalizability of the data. The  
53  
54  
55  
56  
57  
58  
59  
60



1  
2  
3  
4 geographical distribution of the cardiologists across China was not taken into account.  
5  
6 Importantly, the survey was not an epidemiological questionnaire and it was only used for  
7  
8 data collection, not assessment, and validity and reliability were not verified. Finally, the  
9  
10 characteristics of the cardiologists who were unwilling to fill the survey were not collected.  
11  
12  
13 Additional studies are necessary to confirm those findings.  
14

15  
16 In conclusion, the results suggest that Chinese cardiologists do not recognize and pay  
17  
18 attention to their own cardiovascular health. Their antihypertensive treatment level was low.  
19  
20 The identified risk factors could be used to identify cardiologists at higher risk for  
21  
22 hypertension and for implementing preventive interventions. Our results have a number of  
23  
24 implications for the reform of health care awareness and prophylaxis in cardiologists in  
25  
26  
27 China.  
28  
29  
30

## 31 32 **APPENDIX 1**

33  
34 The China Cardiologist Heart Study Questionnaire  
35  
36  
37

## 38 39 **DATA SHARING STATEMENT**

40  
41 No additional data are available.  
42  
43  
44

## 45 46 **ACKNOWLEDGMENTS**

47  
48 The authors acknowledge the contribution of all physicians who participated in this survey.  
49  
50 The study was started by the Chinese Cardiovascular Association and supported by the  
51  
52 GUSU group.  
53  
54  
55  
56  
57

## **FUNDING**

The study is supported by the Emerging Frontier Project of Shanghai Hospital Development Center (No. SHDC12014101), the Innovative Research Group Project of National Natural Science Foundation of China (No. 81521001), and National Key Research and Development Project (No. 2016YFC1301200). The authors declare that they have no conflicts of interest.

## **CONFLICTS OF INTEREST**

The authors declare that they have no conflicts of interest.

## **AUTHORS' CONTRIBUTIONS**

Lei Hou, Xuejuan Jin conceived and coordinated the study, designed, performed and analyzed the experiments, wrote the paper. Jianying Ma, Juying Qian, Yong Huo carried out the data collection, data analysis, and revised the paper. Junbo Ge designed the study, carried out the data analysis, and revised the paper. All authors reviewed the results and approved the final version of the manuscript.

**REFERENCES**

1. Goldstein JA, Balter S, Cowley M, et al. Occupational hazards of interventional cardiologists: prevalence of orthopedic health problems in contemporary practice. *Catheterization and cardiovascular interventions : official journal of the Society for Cardiac Angiography & Interventions* 2004;**63**(4):407-11 doi: 10.1002/ccd.20201[published Online First: Epub Date]].
2. Dehmer GJ. Occupational hazards for interventional cardiologists. *Catheterization and cardiovascular interventions : official journal of the Society for Cardiac Angiography & Interventions* 2006;**68**(6):974-6 doi: 10.1002/ccd.21004[published Online First: Epub Date]].
3. Clark DA. How much is too much? *Catheterization and cardiovascular interventions : official journal of the Society for Cardiac Angiography & Interventions* 2000;**51**(3):265
4. Faggiano P, Temporelli PL, Zito G, et al. [Cardiovascular risk profile and lifestyle habits in a cohort of Italian cardiologists. Results of the SOCRATES survey]. *Monaldi archives for chest disease = Archivio Monaldi per le malattie del torace* 2013;**80**(3):118-25 doi: 10.4081/monaldi.2013.73[published Online First: Epub Date]].
5. Michel JB, Sangha DM, Erwin JP, 3rd. Burnout Among Cardiologists. *The American journal of cardiology* 2017;**119**(6):938-40 doi: 10.1016/j.amjcard.2016.11.052[published Online First: Epub Date]].
6. Gong YJ, Huo Y. A Survey of National Cardiology Workforce in China. *Eur Heart J* 2016;**18**(Suppl):A1-A5

- 1  
2  
3  
4 7. Narang A, Sinha SS, Rajagopalan B, et al. The Supply and Demand of the  
5  
6 Cardiovascular Workforce: Striking the Right Balance. *Journal of the American*  
7  
8 *College of Cardiology* 2016;**68**(15):1680-89 doi:  
9  
10 10.1016/j.jacc.2016.06.070[published Online First: Epub Date]].  
11  
12
- 13  
14 8. Temporelli PL, Zito G, Faggiano P, et al. Cardiovascular risk profile and lifestyle habits  
15  
16 in a cohort of Italian cardiologists (from the SOCRATES Survey). *The American*  
17  
18 *journal of cardiology* 2013;**112**(2):226-30 doi:  
19  
20 10.1016/j.amjcard.2013.03.020[published Online First: Epub Date]].  
21  
22
- 23 9. Merz CN, Mensah GA, Fuster V, et al. Task force #5--the role of cardiovascular  
24  
25 specialists as leaders in prevention: from training to champion. 33rd Bethesda  
26  
27 Conference. *Journal of the American College of Cardiology* 2002;**40**(4):641-51  
28  
29
- 30 10. O'Kelly S, Andersen K, Capewell S, et al. Bringing prevention to the population: an  
31  
32 important role for cardiologists in policy-making. *Eur Heart J* 2011;**32**(16):1964-7  
33  
34 doi: 10.1093/eurheartj/ehr128[published Online First: Epub Date]].  
35  
36
- 37 11. Aboyans V, Pinet P, Lacroix P, et al. Knowledge and management of smoking-  
38  
39 cessation strategies among cardiologists in France: a nationwide survey. *Archives of*  
40  
41 *cardiovascular diseases* 2009;**102**(3):193-9 doi:  
42  
43 10.1016/j.acvd.2009.01.005[published Online First: Epub Date]].  
44  
45
- 46 12. Reiner Z, Sonicki Z, Tedeschi-Reiner E. Physicians' perception, knowledge and  
47  
48 awareness of cardiovascular risk factors and adherence to prevention guidelines: the  
49  
50 PERCRO-DOC survey. *Atherosclerosis* 2010;**213**(2):598-603 doi:  
51  
52 10.1016/j.atherosclerosis.2010.09.014[published Online First: Epub Date]].  
53  
54
- 55 13. Lu Y, Hu XM, Huang XL, et al. The relationship between job satisfaction, work stress,  
56  
57

- 1  
2  
3  
4 work-family conflict, and turnover intention among physicians in Guangdong,  
5  
6 China: a cross-sectional study. *BMJ open* 2017;**7**(5):e014894 doi:  
7  
8 10.1136/bmjopen-2016-014894[published Online First: Epub Date].  
9  
10
- 11 14. Liang Y, Wang H, Tao X. Quality of life of young clinical doctors in public hospitals in  
12  
13 China's developed cities as measured by the Nottingham Health Profile (NHP).  
14  
15 *International journal for equity in health* 2015;**14**:85 doi: 10.1186/s12939-015-  
16  
17 0199-2[published Online First: Epub Date].  
18  
19
- 20 15. Steering Committee of the Physicians' Health Study Research G. Final report on the  
21  
22 aspirin component of the ongoing Physicians' Health Study. *The New England*  
23  
24 *journal of medicine* 1989;**321**(3):129-35 doi:  
25  
26 10.1056/NEJM198907203210301[published Online First: Epub Date].  
27  
28
- 29 16. Hu DY, Yu JM, Chen F, et al. The Chinese physicians' Cardiovascular Risk Evaluation  
30  
31 (CARE) survey: an assessment of physicians' own cardiovascular risks. *Heart Asia*  
32  
33 2010;**2**(1):89-94 doi: 10.1136/ha.2009.001214[published Online First: Epub Date].  
34  
35
- 36 17. He J, Gu D, Chen J, et al. Premature deaths attributable to blood pressure in China: a  
37  
38 prospective cohort study. *Lancet* 2009;**374**(9703):1765-72 doi: 10.1016/S0140-  
39  
40 6736(09)61199-5[published Online First: Epub Date].  
41  
42
- 43 18. Miura K, Daviglius ML, Dyer AR, et al. Relationship of blood pressure to 25-year  
44  
45 mortality due to coronary heart disease, cardiovascular diseases, and all causes in  
46  
47 young adult men: the Chicago Heart Association Detection Project in Industry.  
48  
49 *Archives of internal medicine* 2001;**161**(12):1501-8  
50  
51
- 52 19. Franco OH, Peeters A, Bonneux L, et al. Blood pressure in adulthood and life  
53  
54 expectancy with cardiovascular disease in men and women: life course analysis.  
55  
56  
57  
58  
59  
60

- 1  
2  
3  
4 Hypertension 2005;**46**(2):280-6 doi:  
5  
6 10.1161/01.HYP.0000173433.67426.9b[published Online First: Epub Date]].  
7  
8  
9 20. Whelton PK, Carey RM, Aronow WS, et al. 2017  
10 ACC/AHA/AAPA/ABC/ACPM/AGS/APhA/ASH/ASPC/NMA/PCNA Guideline  
11 for the Prevention, Detection, Evaluation, and Management of High Blood Pressure  
12 in Adults: A Report of the American College of Cardiology/American Heart  
13 Association Task Force on Clinical Practice Guidelines. Journal of the American  
14 College of Cardiology 2018;**71**(19):e127-e248 doi:  
15  
16 10.1016/j.jacc.2017.11.006[published Online First: Epub Date]].  
17  
18  
19  
20  
21  
22  
23  
24  
25 21. Spruill TM. Chronic psychosocial stress and hypertension. Current hypertension reports  
26 2010;**12**(1):10-6 doi: 10.1007/s11906-009-0084-8[published Online First: Epub  
27 Date]].  
28  
29  
30  
31  
32 22. Vrijkotte TG, van Doornen LJ, de Geus EJ. Effects of work stress on ambulatory blood  
33 pressure, heart rate, and heart rate variability. Hypertension 2000;**35**(4):880-6  
34  
35  
36  
37 23. Trudel X, Brisson C, Milot A, et al. Adverse psychosocial work factors, blood pressure  
38 and hypertension incidence: repeated exposure in a 5-year prospective cohort study.  
39 Journal of epidemiology and community health 2016;**70**(4):402-8 doi:  
40 10.1136/jech-2014-204914[published Online First: Epub Date]].  
41  
42  
43  
44  
45  
46 24. Calhoun DA, Harding SM. Sleep and hypertension. Chest 2010;**138**(2):434-43 doi:  
47 10.1378/chest.09-2954[published Online First: Epub Date]].  
48  
49  
50  
51 25. Wang Y, Mei H, Jiang YR, et al. Relationship between Duration of Sleep and  
52 Hypertension in Adults: A Meta-Analysis. Journal of clinical sleep medicine :  
53 JCSM : official publication of the American Academy of Sleep Medicine  
54  
55  
56  
57  
58  
59  
60

- 2015;**11**(9):1047-56 doi: 10.5664/jcsm.5024[published Online First: Epub Date]].
26. Wu J, Cheng X, Qiu L, et al. Prevalence and Clustering of Major Cardiovascular Risk Factors in China: A Recent Cross-Sectional Survey. *Medicine* 2016;**95**(10):e2712 doi: 10.1097/MD.0000000000002712[published Online First: Epub Date]].
27. Lu Y, Wang P, Zhou T, et al. Comparison of Prevalence, Awareness, Treatment, and Control of Cardiovascular Risk Factors in China and the United States. *Journal of the American Heart Association* 2018;**7**(3) doi: 10.1161/JAHA.117.007462[published Online First: Epub Date]].
28. Yang F, Qian D, Hu DY, et al. Prevalence of cardiovascular disease risk factor clustering in Chinese adults. *Clin Trials Regul Sci Cardiol* 2016
29. Sui H, Chen WW, Wang W. Interpretation of Report on Cardiovascular Diseases in China 2015. *Chin J Cardiovasc Med* 2016;**21**(4):259-61
30. Huang XB, Chen F, Dai W, et al. Prevalence and risk factors associated with hypertension in the Chinese Qiang population. *Clinical and experimental hypertension* 2018;**40**(5):427-33 doi: 10.1080/10641963.2017.1392553[published Online First: Epub Date]].
31. Hu Y, Wang Z, Wang Y, et al. Prevalence, Awareness, Treatment, and Control of Hypertension among Kazakhs with high Salt Intake in Xinjiang, China: A Community-based Cross-sectional Study. *Scientific reports* 2017;**7**:45547 doi: 10.1038/srep45547[published Online First: Epub Date]].
32. Abuissa H, Lavie C, Spertus J, et al. Personal health habits of American cardiologists. *The American journal of cardiology* 2006;**97**(7):1093-6 doi: 10.1016/j.amjcard.2005.10.057[published Online First: Epub Date]].

- 1  
2  
3  
4 33. Lloyd-Jones DM, Evans JC, Levy D. Hypertension in adults across the age spectrum:  
5 current outcomes and control in the community. *Jama* 2005;**294**(4):466-72 doi:  
6 10.1001/jama.294.4.466[published Online First: Epub Date]].  
7  
8  
9  
10  
11 34. James PA, Oparil S, Carter BL, et al. 2014 evidence-based guideline for the  
12 management of high blood pressure in adults: report from the panel members  
13 appointed to the Eighth Joint National Committee (JNC 8). *Jama* 2014;**311**(5):507-  
14 20 doi: 10.1001/jama.2013.284427[published Online First: Epub Date]].  
15  
16  
17  
18  
19  
20  
21 35. Leung AA, Daskalopoulou SS, Dasgupta K, et al. Hypertension Canada's 2017  
22 Guidelines for Diagnosis, Risk Assessment, Prevention, and Treatment of  
23 Hypertension in Adults. *The Canadian journal of cardiology* 2017;**33**(5):557-76 doi:  
24 10.1016/j.cjca.2017.03.005[published Online First: Epub Date]].  
25  
26  
27  
28  
29  
30 36. Stockwell DH, Madhavan S, Cohen H, et al. The determinants of hypertension  
31 awareness, treatment, and control in an insured population. *American journal of*  
32 *public health* 1994;**84**(11):1768-74  
33  
34  
35  
36  
37 37. Berhe DF, Taxis K, Haaijer-Ruskamp FM, et al. Hypertension treatment practices and  
38 its determinants among ambulatory patients: retrospective cohort study in Ethiopia.  
39 *BMJ open* 2017;**7**(8):e015743 doi: 10.1136/bmjopen-2016-015743[published  
40 Online First: Epub Date]].  
41  
42  
43  
44  
45  
46 38. Levinson W, King TE, Jr., Goldman L, et al. Clinical decisions. American Board of  
47 Internal Medicine maintenance of certification program. *The New England journal*  
48 *of medicine* 2010;**362**(10):948-52 doi: 10.1056/NEJMclde0911205[published  
49 Online First: Epub Date]].  
50  
51  
52  
53  
54  
55 39. Song P, Jin C, Tang W. New medical education reform in China: Towards healthy  
56  
57  
58  
59  
60



- 1  
2  
3  
4 China 2030. Bioscience trends 2017;**11**(4):366-69 doi:  
5  
6 10.5582/bst.2017.01198[published Online First: Epub Date]].  
7  
8  
9 40. The L. Medical education reform in China. Lancet 2017;**390**(10092):334 doi:  
10  
11 10.1016/S0140-6736(17)31921-9[published Online First: Epub Date]].  
12  
13 41. Chen X, Tan X, Li L. Health Problem and Occupational Stress among Chinese Doctors.  
14  
15 Chin Med 2013;**2013**(4):1-6  
16  
17 42. Staiger DO, Auerbach DI, Buerhaus PI. Trends in the work hours of physicians in the  
18  
19 United States. Jama 2010;**303**(8):747-53 doi: 10.1001/jama.2010.168[published  
20  
21 Online First: Epub Date]].  
22  
23 43. Conway SH, Pompeii LA, Roberts RE, et al. Dose-Response Relation Between Work  
24  
25 Hours and Cardiovascular Disease Risk: Findings From the Panel Study of Income  
26  
27 Dynamics. Journal of occupational and environmental medicine 2016;**58**(3):221-6  
28  
29 doi: 10.1097/JOM.0000000000000654[published Online First: Epub Date]].  
30  
31  
32 44. Wu Y, Huxley R, Li L, et al. Prevalence, awareness, treatment, and control of  
33  
34 hypertension in China: data from the China National Nutrition and Health Survey  
35  
36 2002. Circulation 2008;**118**(25):2679-86 doi:  
37  
38 10.1161/CIRCULATIONAHA.108.788166[published Online First: Epub Date]].  
39  
40  
41 45. Wang J, Zhang L, Wang F, et al. Prevalence, awareness, treatment, and control of  
42  
43 hypertension in China: results from a national survey. American journal of  
44  
45 hypertension 2014;**27**(11):1355-61 doi: 10.1093/ajh/hpu053[published Online First:  
46  
47 Epub Date]].  
48  
49  
50  
51  
52  
53  
54  
55  
56  
57  
58  
59  
60

**Table 1.** Demographic characteristics, current disease and medication of the participants

| Variable        | Total (n=28,924) |
|-----------------|------------------|
| Age (years)     | 37.82±9.27       |
| 20-29           | 5308 (18.35)     |
| 30-39           | 12,338 (42.66)   |
| 40-49           | 8019 (27.72)     |
| 50-59           | 2674 (9.24)      |
| 60-69           | 584 (2.02)       |
| ≥70             | 1 (0.00)         |
| Gender          |                  |
| Male            | 15,749 (54.45)   |
| Female          | 13,175 (45.55)   |
| Academic degree |                  |
| Junior college  | 225 (0.78)       |
| Bachelor        | 12,704 (43.92)   |
| Master          | 10,580 (36.58)   |
| Doctor          | 2905 (10.04)     |
| Post-doctor     | 412 (1.42)       |
| Others          | 2098 (7.25)      |
| Hospital level  |                  |
| Primary         | 381 (1.32)       |
| Secondary       | 10,823 (37.42)   |

|    |                                  |                |
|----|----------------------------------|----------------|
| 1  |                                  |                |
| 2  |                                  |                |
| 3  |                                  |                |
| 4  | Tertiary                         | 17,375 (60.07) |
| 5  |                                  |                |
| 6  | Others                           | 345 (1.19)     |
| 7  |                                  |                |
| 8  |                                  |                |
| 9  | Professional title               |                |
| 10 |                                  |                |
| 11 | General physician                | 4230 (14.62)   |
| 12 |                                  |                |
| 13 | Healer                           | 540 (1.87)     |
| 14 |                                  |                |
| 15 | Resident physician               | 966 (3.34)     |
| 16 |                                  |                |
| 17 | Attending physician              | 13,448 (46.49) |
| 18 |                                  |                |
| 19 | Associate chief physician        | 4674 (16.16)   |
| 20 |                                  |                |
| 21 | Chief physician                  | 2279 (7.88)    |
| 22 |                                  |                |
| 23 | Others                           | 2787 (9.64)    |
| 24 |                                  |                |
| 25 |                                  |                |
| 26 |                                  |                |
| 27 | BMI (kg/m <sup>2</sup> )         | 22.35±2.51     |
| 28 |                                  |                |
| 29 | <18.5                            | 1475 (5.10)    |
| 30 |                                  |                |
| 31 | 18.5-23.9                        | 19,304 (66.74) |
| 32 |                                  |                |
| 33 | ≥24                              | 8145 (28.16)   |
| 34 |                                  |                |
| 35 |                                  |                |
| 36 | Current disease                  |                |
| 37 |                                  |                |
| 38 | Coronary heart disease           | 1760 (6.08)    |
| 39 |                                  |                |
| 40 | Heart failure                    | 554 (1.92)     |
| 41 |                                  |                |
| 42 | Diabetes                         | 598 (2.07)     |
| 43 |                                  |                |
| 44 | Stroke/transient ischemic attack | 167 (0.58)     |
| 45 |                                  |                |
| 46 | Chronic kidney disease           | 409 (1.41)     |
| 47 |                                  |                |
| 48 | Peripheral vascular disease      | 431 (1.49)     |
| 49 |                                  |                |
| 50 | Hypertension                     | 7319 (25.30)   |
| 51 |                                  |                |
| 52 |                                  |                |
| 53 |                                  |                |
| 54 |                                  |                |
| 55 |                                  |                |
| 56 |                                  |                |
| 57 |                                  |                |
| 58 |                                  |                |
| 59 |                                  |                |
| 60 |                                  |                |

## Medication

|                        |             |
|------------------------|-------------|
| Antihypertensive drugs | 2323 (8.03) |
| Antidiabetic drugs     | 574 (1.98)  |
| Lipid-lowering drugs   | 1223 (4.23) |

---

Data are expressed as mean±standard deviation or n (%). BMI, body mass index.

For peer review only

**Table 2.** Clinical characteristics of the participants

| Variable                       | Total (n=28,924) |
|--------------------------------|------------------|
| SBP/DBP (mmHg)                 |                  |
| SBP                            | 122.74±14.27     |
| DBP                            | 81.2±12.04       |
| <130/<80                       | 8802 (30.43)     |
| Taking antihypertensive drugs  | 228 (2.59)       |
| 130-139/80-89                  | 13,763 (47.58)   |
| Taking antihypertensive drugs  | 732 (5.32)       |
| ≥140/≥90                       | 6359 (21.99)     |
| Taking antihypertensive drugs  | 2323 (36.53)     |
| Heart rate (bpm)               | 74.11±9.26       |
| <50                            | 1 (0.00)         |
| 50-59                          | 778 (2.69)       |
| 60-69                          | 6972 (24.1)      |
| 70-79                          | 13,033 (45.06)   |
| 80-89                          | 6600 (22.82)     |
| ≥90                            | 1540 (5.32)      |
| Fasting blood glucose (mmol/L) | 5.1±1.65         |
| <6.1                           | 26,030 (89.99)   |
| 6.1-6.9                        | 1810 (6.26)      |
| ≥7.0                           | 1084 (3.75)      |

|                |                |
|----------------|----------------|
| LDL-C (mmol/L) | 2.73±0.87      |
| <2.6           | 12,888 (44.56) |
| 2.6-3.3        | 12,058 (41.69) |
| 3.4-4.0        | 2363 (8.17)    |
| ≥4.1           | 1614 (5.58)    |
| Unknown        | 1 (0.00)       |
| HDL-C (mmol/L) | 1.85±1.02      |
| <1.0           | 1879 (6.50)    |
| ≥1.0           | 27,043 (93.50) |
| Unknown        | 2 (0.01)       |
| TC (mmol/L)    | 4.09±1.23      |
| <5.2           | 24,972 (86.34) |
| 5.2-6.1        | 2988 (10.33)   |
| ≥6.2           | 957 (3.31)     |
| Unknown        | 7 (0.02)       |
| TG (mmol/L)    | 1.6 (1.2,2.2)  |
| <1.7           | 15,547 (53.75) |
| 1.7-2.2        | 6345 (21.94)   |
| ≥2.3           | 7029 (24.30)   |
| Unknown        | 3 (0.01)       |
| Smoking        |                |
| Frequent       | 4660 (16.11)   |

|    |                |                |
|----|----------------|----------------|
| 1  |                |                |
| 2  |                |                |
| 3  |                |                |
| 4  | Infrequent     | 13,561 (46.88) |
| 5  |                |                |
| 6  | Never          | 10,703 (37.00) |
| 7  |                |                |
| 8  |                |                |
| 9  | Family history |                |
| 10 |                |                |
| 11 | Yes            | 22,611 (78.17) |
| 12 |                |                |
| 13 | No             | 6313 (21.83)   |
| 14 |                |                |
| 15 |                |                |

16 Data are expressed as mean±standard deviation or n (%). DBP, diastolic blood pressure;  
17  
18 HDL-C, high density lipoprotein-cholesterol; LDL-C, low density lipoprotein-cholesterol;  
19  
20 SBP, systolic blood pressure; TC, total cholesterol; TG, triglyceride.  
21  
22  
23  
24  
25  
26  
27  
28  
29  
30  
31  
32  
33  
34  
35  
36  
37  
38  
39  
40  
41  
42  
43  
44  
45  
46  
47  
48  
49  
50  
51  
52  
53  
54  
55  
56  
57  
58  
59  
60

**Table 3.** Prevalence of hypertension, rate of antihypertensive drugs taking, and rate of reaching the target blood pressure in cardiologists with different gender

| Variable                           | Total<br>(n=28,924) | Male<br>(n=15,749) | Female<br>(n=13,175) | P      |
|------------------------------------|---------------------|--------------------|----------------------|--------|
| Hypertension                       | 7319 (25.30)        | 4574 (29.00)       | 2745 (20.83)         | <0.001 |
| Taking antihypertensive drugs      | 2323 (31.74)        | 1533 (33.52)       | 790 (28.78)          | <0.001 |
| Reaching the target blood pressure | 960 (41.33)         | 610 (39.79)        | 350 (44.30)          | 0.036  |

Data are expressed as n (%).



**Table 4.** Prevalence of hypertension, rate of antihypertensive drugs taking, and rate of reaching the target blood pressure in cardiologists with different age

| Variable                           | Total        | 20-29        | 30-39        | 40-49        | 50-59       | 60-69       | ≥70     | P      |
|------------------------------------|--------------|--------------|--------------|--------------|-------------|-------------|---------|--------|
|                                    | (n=28924)    | (n=5308)     | (n=12,338)   | (n=8019)     | (n=2674)    | (n=584)     | (n=1)   |        |
| Hypertension                       | 7319 (25.3)  | 1276 (24.04) | 2680 (21.72) | 2158 (26.91) | 946 (35.38) | 258 (44.18) | 1 (100) | <0.001 |
| Taking antihypertensive drugs      | 2323 (31.74) | 256 (20.06)  | 738 (27.54)  | 806 (37.35)  | 397 (41.97) | 126 (48.84) | 0       | <0.001 |
| Reaching the target blood pressure | 960 (41.33)  | 124 (48.44)  | 322 (43.63)  | 336 (41.69)  | 130 (32.75) | 48 (38.10)  | -       | 0.001  |

Data are expressed as n (%).

**Table 5.** Prevalence of hypertension, rate of antihypertensive drugs taking, and rate of reaching the target blood pressure in cardiologists with different hospital level

| Variable                           | Total<br>(n=28,924) | Primary<br>(n=381) | Secondary<br>(n=10,823) | Tertiary<br>(n=17,375) | Others<br>(n=345) | P      |
|------------------------------------|---------------------|--------------------|-------------------------|------------------------|-------------------|--------|
| Hypertension                       | 7319 (25.30)        | 136 (35.70)        | 2695 (24.90)            | 4413 (25.40)           | 75 (21.74)        | <0.001 |
| Taking antihypertensive drugs      | 2323 (31.74)        | 38 (27.94)         | 904 (33.43)             | 1354 (30.68)           | 27 (36.00)        | 0.049  |
| Reaching the target blood pressure | 960 (41.33)         | 8 (21.05)          | 390 (43.14)             | 551 (40.69)            | 11 (40.74)        | 0.048  |

Data are expressed as n (%).

**CCHS****QUESTIONNAIRE**

China Cardiologist Heart Study

**FORM**

**INSTRUCTIONS:** This collection of information is estimated to average 10 minutes. Name and contact information must be entered above. Please enter the number so that the last digit appears in the rightmost box. Enter leading zeros where necessary to fill all boxes. For "multiple choice" and "yes/no" type questions, circle the letter corresponding to the most appropriate response. If a letter is circled incorrectly, mark through it with an "X" and circle the correct response.

**CCHS Center use only**Sequence Number 

1. Name: \_\_\_\_\_

2. Date of birth: / (yyyy/mm)

3. Contact phone number: \_\_\_\_\_

4. Employer: Hospital name, district/county, city, province/municipality \_\_\_\_\_

**A. Personal information**1. Hospital level: 

2. Professional title: \_\_\_\_\_

3. Academic degree: \_\_\_\_\_

4. Area of expertise (multiple choices available):

- |                                                                  |                                                             |
|------------------------------------------------------------------|-------------------------------------------------------------|
| <input type="radio"/> Atherosclerosis and coronary heart disease | <input type="radio"/> Hypertension                          |
| <input type="radio"/> Arrhythmia and electrophysiology           | <input type="radio"/> Blood lipid metabolism                |
| <input type="radio"/> Congenital heart disease                   | <input type="radio"/> Heart failure                         |
| <input type="radio"/> Pulmonary vascular disease                 | <input type="radio"/> Structural heart disease              |
| <input type="radio"/> Female cardiovascular disease              | <input type="radio"/> Senile cardiovascular disease         |
| <input type="radio"/> Basic-clinical combination                 | <input type="radio"/> Cardiovascular imaging                |
| <input type="radio"/> Interventional cardiology                  | <input type="radio"/> Cardiac intensive care and monitoring |
| <input type="radio"/> Others                                     |                                                             |

**B. Survey information**1. Gender:  Male  Female2. Height: .  cm3. Weight: .  kg

1  
2  
3  
4. Are you currently taking the following medications? (multiple choices available)

- 4       ○ Antihypertensive drugs
- 5       ○ Lipid-lowering drugs
- 6       ○ Antidiabetic drugs
- 7       ○ None

8  
9  
10  
11 5. Do you have any of the following clinical conditions? (multiple choices available)

- 12       ○ None
- 13       ○ Coronary heart disease
- 14       ○ Heart failure
- 15       ○ Diabetes
- 16       ○ Chronic kidney disease
- 17       ○ Peripheral vascular disease
- 18       ○ Stroke/transient ischemic attack

19  
20  
21  
22  
23  
24  
25 6. Did you smoke  $\geq 1$  cigarette per day in the past 3 months?

- 26       ○ Yes
- 27       ○ No
- 28       ○ Never smoked

29  
30  
31  
32 7. Do you have a first-degree male relative who suffered from a cardiovascular disease at  $<55$   
33 years of age or a first-degree female relative who suffered from a cardiovascular disease at  $<65$   
34 years of age?

- 35       ○ No
- 36       ○ Yes

37  
38  
39  
40  
41  
42 **C. Blood Pressure** (Please record the data in the last 2 weeks, If don't know, please fill in 999)

43 1. Average sitting systolic blood pressure: mmHg

44 2. Average sitting diastolic blood pressure: mmHg

45 3. Average heart rate: bpm

46  
47  
48  
49  
50  
51 **D. Laboratory** (Please record the data of the most recent results within a year, If don't know,  
52 please fill in 999)

53 1. Fasting blood glucose: .mmol/L

54 2. Total cholesterol (TC): .mmol/L or .mg/dL

55 3. Low density lipoprotein-cholesterol (LDL-C): .mmol/L or .mg/dL

56 4. High density lipoprotein-cholesterol (HDL-C): .mmol/L or .mg/dL

1  
2  
3  
4  
5  
6  
7  
8  
9  
10  
11  
12  
13  
14  
15  
16  
17  
18  
19  
20  
21  
22  
23  
24  
25  
26  
27  
28  
29  
30  
31  
32  
33  
34  
35  
36  
37  
38  
39  
40  
41  
42  
43  
44  
45  
46  
47  
48  
49  
50  
51  
52  
53  
54  
55  
56  
57  
58  
59  
60

5. Triglyceride (TG):   .  mmol/L or    .  mg/dL

**Thank you very much for your help!**

For peer review only

**Table S1.** Area of expertise of the participants

| Variable                                   | Total (n=28,924) |
|--------------------------------------------|------------------|
| Atherosclerosis and coronary heart disease | 14,783 (51.11)   |
| Hypertension                               | 18,477 (63.88)   |
| Arrhythmia and electrophysiology           | 8226 (28.44)     |
| Blood lipid metabolism                     | 10,147 (35.08)   |
| Congenital heart disease                   | 4678 (16.17)     |
| Heart failure                              | 9087 (31.42)     |
| Pulmonary vascular disease                 | 2859 (9.88)      |
| Cardiac intensive care and monitoring      | 2051 (7.09)      |
| Interventional cardiology                  | 2526 (8.73)      |
| Cardiovascular imaging                     | 2742 (9.48)      |
| Senile cardiovascular disease              | 0                |
| Female cardiovascular disease              | 2859 (9.88)      |
| Structural heart disease                   | 3774 (13.05)     |
| Basic-clinical combination                 | 2350 (8.12)      |
| Others                                     | 2746 (9.49)      |

Data are expressed as n (%).

**Table S2.** Prevalence of hypertension, rate of antihypertensive drugs taking, and rate of reaching the target blood pressure in male cardiologists with different age

| Variable                           | 20-29      | 30-39       | 40-49       | 50-59      | 60-69      | ≥70     | P      |
|------------------------------------|------------|-------------|-------------|------------|------------|---------|--------|
|                                    | (n=2437)   | (n=6777)    | (n=4521)    | (n=1656)   | (n=357)    | (n=1)   |        |
| Hypertension                       | 684 (28.1) | 1709 (25.2) | 1362 (30.1) | 647 (39.1) | 171 (47.9) | 1 (100) | <0.001 |
| Taking antihypertensive drugs      | 159 (23.2) | 510 (29.8)  | 506 (37.2)  | 272 (42)   | 86 (50.3)  | 0       | <0.001 |
| Reaching the target blood pressure | 124 (48.4) | 322 (43.6)  | 336 (41.7)  | 130 (32.7) | 48 (38.1)  | -       | 0.001  |

Data are expressed as n (%).

**Table S3.** Prevalence of hypertension, rate of antihypertensive drugs taking, and rate of reaching the target blood pressure in female cardiologists with different age

| Variable                           | 20-29      | 30-39      | 40-49      | 50-59      | 60-69     | P      |
|------------------------------------|------------|------------|------------|------------|-----------|--------|
|                                    | (n=2871)   | (n=5561)   | (n=3498)   | (n=1018)   | (n=227)   |        |
| Hypertension                       | 592 (20.6) | 971 (17.5) | 796 (22.8) | 299 (29.4) | 87 (38.3) | <0.001 |
| Taking antihypertensive drugs      | 97 (16.4)  | 228 (23.5) | 300 (37.7) | 125 (41.8) | 40 (46.0) | <0.001 |
| Reaching the target blood pressure | 51 (52.6)  | 107 (46.9) | 132 (44)   | 45 (36)    | 15 (37.5) | 0.108  |

Data are expressed as n (%).



**Table S4.** Prevalence of hypertension, rate of antihypertensive drugs taking, and rate of reaching the target blood pressure in male cardiologists with different hospital level

| Variable                           | Primary<br>(n=211) | Secondary<br>(n=5807) | Tertiary<br>(n=9552) | Others<br>(n=179) | P      |
|------------------------------------|--------------------|-----------------------|----------------------|-------------------|--------|
| Hypertension                       | 92 (43.6)          | 1674 (28.8)           | 2765 (28.9)          | 43 (24.0)         | <0.001 |
| Taking antihypertensive drugs      | 28 (30.4)          | 581 (34.7)            | 912 (33)             | 12 (27.9)         | 0.491  |
| Reaching the target blood pressure | 5 (17.9)           | 229 (39.4)            | 374 (41)             | 2 (16.7)          | 0.031  |

Data are expressed as n (%).

**Table S5.** Prevalence of hypertension, rate of antihypertensive drugs taking, and rate of reaching the target blood pressure in female cardiologists with different hospital level

| Variable                           | Primary<br>(n=170) | Secondary<br>(n=5016) | Tertiary<br>(n=7823) | Others<br>(n=166) | P     |
|------------------------------------|--------------------|-----------------------|----------------------|-------------------|-------|
| Hypertension                       | 44 (25.9)          | 1021 (20.4)           | 1648 (21.1)          | 32 (19.3)         | 0.281 |
| Taking antihypertensive drugs      | 10 (22.7)          | 323 (31.6)            | 442 (26.8)           | 15 (46.9)         | 0.005 |
| Reaching the target blood pressure | 3 (30.0)           | 161 (49.8)            | 177 (40)             | 9 (60.0)          | 0.022 |

Data are expressed as n (%).

**Table S6.** Prevalence of hypertension, rate of antihypertensive drugs taking, and rate of reaching the target blood pressure in cardiologists with different professional title

| Variable                           | Total        | General               | Healer      | Resident             | Attending               | Associate chief       | Chief                 | Others      | P      |
|------------------------------------|--------------|-----------------------|-------------|----------------------|-------------------------|-----------------------|-----------------------|-------------|--------|
|                                    | (n=28,924)   | physician<br>(n=4230) | (n=540)     | physician<br>(n=966) | physician<br>(n=13,448) | physician<br>(n=4674) | physician<br>(n=2279) | (n=2787)    |        |
| Hypertension                       | 7319 (25.30) | 896 (21.18)           | 139 (25.74) | 263 (27.23)          | 3032 (22.55)            | 1413 (30.23)          | 806 (35.37)           | 770 (27.63) | <0.001 |
| Taking antihypertensive drugs      | 2323 (31.74) | 179 (19.98)           | 46 (33.09)  | 88 (33.46)           | 934 (30.80)             | 546 (38.64)           | 357 (44.29)           | 173 (22.47) | <0.001 |
| Reaching the target blood pressure | 960 (41.33)  | 70 (39.11)            | 21 (45.65)  | 49 (55.68)           | 404 (43.25)             | 192 (35.16)           | 135 (37.82)           | 89 (51.45)  | <0.001 |

Data are expressed as n (%).

**Table S7.** Prevalence of hypertension, rate of antihypertensive drugs taking, and rate of reaching the target blood pressure in male cardiologists with different professional title

| Variable                           | General physician<br>(n=2049) | Healer<br>(n=260) | Resident physician<br>(n=548) | Attending physician<br>(n=7447) | Associate physician<br>(n=2740) | chief physician<br>(n=1447) | Chief physician<br>(n=1258) | Others<br>(n=1258) | P |
|------------------------------------|-------------------------------|-------------------|-------------------------------|---------------------------------|---------------------------------|-----------------------------|-----------------------------|--------------------|---|
| Hypertension                       | 507 (24.7)                    | 82 (31.5)         | 159 (29)                      | 1944 (26.1)                     | 896 (32.7)                      | 579 (40.0)                  | 407 (32.4)                  | <0.001             |   |
| Taking antihypertensive drugs      | 120 (23.7)                    | 33 (40.2)         | 63 (39.6)                     | 620 (31.9)                      | 335 (37.4)                      | 264 (45.6)                  | 98 (24.1)                   | <0.001             |   |
| Reaching the target blood pressure | 43 (35.8)                     | 11 (33.3)         | 32 (50.8)                     | 259 (41.8)                      | 117 (34.9)                      | 96 (36.4)                   | 52 (53.1)                   | 0.008              |   |

Data are expressed as n (%).

**Table S8.** Prevalence of hypertension, rate of antihypertensive drugs taking, and rate of reaching the target blood pressure in female cardiologists with different professional title

| Variable                              | General<br>physician<br>(n=2181) | Healer<br>(n=280) | Resident<br>physician<br>(n=418) | Attending<br>physician<br>(n=6001) | Associate chief<br>physician<br>(n=1934) | Chief<br>physician<br>(n=832) | Others<br>(n=1529) | P      |
|---------------------------------------|----------------------------------|-------------------|----------------------------------|------------------------------------|------------------------------------------|-------------------------------|--------------------|--------|
| Hypertension                          | 389 (17.8)                       | 57 (20.4)         | 104 (24.9)                       | 1088 (18.1)                        | 517 (26.7)                               | 227 (27.3)                    | 363 (23.7)         | <0.001 |
| Taking antihypertensive drugs         | 59 (15.2)                        | 13 (22.8)         | 25 (24.0)                        | 314 (28.9)                         | 211 (40.8)                               | 93 (41.0)                     | 75 (20.7)          | <0.001 |
| Reaching the target blood<br>pressure | 27 (45.8)                        | 10 (76.9)         | 17 (68.0)                        | 145 (46.2)                         | 75 (35.5)                                | 39 (41.9)                     | 37 (49.3)          | 0.004  |

Data are expressed as n (%).

**Table S9.** Univariable and multivariable logistic regressions for hypertension among cardiologists

| Variable        | Univariable logistic regression |        | Multivariable logistic regression |        |
|-----------------|---------------------------------|--------|-----------------------------------|--------|
|                 | OR (95%CI)                      | P      | OR (95%CI)                        | P      |
| Age (years)     |                                 |        |                                   |        |
| 20-29           | Reference                       |        | Reference                         |        |
| 30-39           | 0.877 (0.813,0.946)             | 0.001  | 0.915 (0.793,1.056)               | 0.227  |
| 40-49           | 1.163 (1.074,1.26)              | <0.001 | 1.012 (0.861,1.189)               | 0.885  |
| 50-59           | 1.73 (1.563,1.914)              | <0.001 | 1.397 (1.164,1.678)               | <0.001 |
| ≥60             | 2.51 (2.108,2.99)               | <0.001 | 1.949 (1.534,2.476)               | <0.001 |
| Gender          |                                 |        |                                   |        |
| Male            | Reference                       |        |                                   |        |
| Female          | 0.643 (0.609,0.679)             | <0.001 | 0.866 (0.813,0.924)               | <0.001 |
| Academic degree |                                 |        |                                   |        |
| Junior college  | Reference                       |        | Reference                         |        |
| Bachelor        | 0.631 (0.476,0.837)             | 0.001  | 0.629 (0.461,0.859)               | 0.004  |

|    |                           |                     |        |                     |        |
|----|---------------------------|---------------------|--------|---------------------|--------|
| 1  |                           |                     |        |                     |        |
| 2  |                           |                     |        |                     |        |
| 3  |                           |                     |        |                     |        |
| 4  |                           |                     |        |                     |        |
| 5  | Master                    | 0.713 (0.538,0.946) | 0.019  | 0.722 (0.528,0.988) | 0.042  |
| 6  |                           |                     |        |                     |        |
| 7  | Doctor                    | 0.86 (0.643,1.149)  | 0.307  | 0.774 (0.56,1.069)  | 0.120  |
| 8  |                           |                     |        |                     |        |
| 9  | Post-doctor               | 1.049 (0.742,1.482) | 0.787  | 0.776 (0.53,1.136)  | 0.191  |
| 10 |                           |                     |        |                     |        |
| 11 | Others                    | 0.844 (0.628,1.133) | 0.258  | 0.771 (0.553,1.074) | 0.124  |
| 12 |                           |                     |        |                     |        |
| 13 |                           |                     |        |                     |        |
| 14 | Hospital level            |                     |        |                     |        |
| 15 |                           |                     |        |                     |        |
| 16 | Primary                   | Reference           |        | Reference           |        |
| 17 |                           |                     |        |                     |        |
| 18 | Secondary                 | 0.597 (0.482,0.74)  | <0.001 | 0.582 (0.464,0.728) | <0.001 |
| 19 |                           |                     |        |                     |        |
| 20 | Tertiary                  | 0.613 (0.496,0.758) | <0.001 | 0.579 (0.463,0.724) | <0.001 |
| 21 |                           |                     |        |                     |        |
| 22 | Others                    | 0.5 (0.359,0.696)   | <0.001 | 0.508 (0.359,0.717) | <0.001 |
| 23 |                           |                     |        |                     |        |
| 24 |                           |                     |        |                     |        |
| 25 | Professional title        |                     |        |                     |        |
| 26 |                           |                     |        |                     |        |
| 27 | General physician         | Reference           |        | Reference           |        |
| 28 |                           |                     |        |                     |        |
| 29 | Healer                    | 1.29 (1.049,1.586)  | 0.016  | 1.01 (0.791,1.291)  | 0.934  |
| 30 |                           |                     |        |                     |        |
| 31 | Resident physician        | 1.392 (1.187,1.633) | <0.001 | 1.064 (0.871,1.301) | 0.542  |
| 32 |                           |                     |        |                     |        |
| 33 | Attending physician       | 1.083 (0.996,1.178) | 0.063  | 0.965 (0.841,1.107) | 0.611  |
| 34 |                           |                     |        |                     |        |
| 35 | Associate chief physician | 1.612 (1.464,1.776) | <0.001 | 1.118 (0.948,1.317) | 0.185  |
| 36 |                           |                     |        |                     |        |
| 37 |                           |                     |        |                     |        |
| 38 |                           |                     |        |                     |        |
| 39 |                           |                     |        |                     |        |
| 40 |                           |                     |        |                     |        |
| 41 |                           |                     |        |                     |        |
| 42 |                           |                     |        |                     |        |
| 43 |                           |                     |        |                     |        |
| 44 |                           |                     |        |                     |        |
| 45 |                           |                     |        |                     |        |
| 46 |                           |                     |        |                     |        |

|                               |                     |        |                     |        |
|-------------------------------|---------------------|--------|---------------------|--------|
| Chief physician               | 2.037 (1.819,2.281) | <0.001 | 1.131 (0.94,1.361)  | 0.192  |
| Others                        | 1.42 (1.271,1.587)  | <0.001 | 1.193 (0.99,1.438)  | 0.063  |
| <b>BMI (kg/m<sup>2</sup>)</b> |                     |        |                     |        |
| <18.5                         | 0.744 (0.649,0.853) | <0.001 | 0.919 (0.797,1.061) | 0.248  |
| 18.5-23.9                     | Reference           |        | Reference           |        |
| ≥24                           | 1.627 (1.536,1.723) | <0.001 | 1.314 (1.233,1.4)   | <0.001 |
| <b>Smoking</b>                |                     |        |                     |        |
| Frequent                      | Reference           |        | Reference           |        |
| Infrequent                    | 0.422 (0.394,0.453) | <0.001 | 0.568 (0.525,0.613) | <0.001 |
| Never                         | 0.342 (0.318,0.369) | <0.001 | 0.469 (0.431,0.509) | <0.001 |
| <b>Family history</b>         |                     |        |                     |        |
| No                            | Reference           |        | Reference           |        |
| Yes                           | 1.77 (1.667,1.880)  | <0.001 | 1.261 (1.18,1.348)  | <0.001 |
| <b>Comorbidity</b>            |                     |        |                     |        |
| No                            | Reference           |        | Reference           |        |



1  
2  
3  
4  
5  
6  
7  
8  
9  
10  
11  
12  
13  
14  
15  
16  
17  
18  
19  
20  
21  
22  
23  
24  
25  
26  
27  
28  
29  
30  
31  
32  
33  
34  
35  
36  
37  
38  
39  
40  
41  
42  
43  
44  
45  
46

|     |                     |        |                    |        |
|-----|---------------------|--------|--------------------|--------|
| Yes | 4.003 (3.723,4.304) | <0.001 | 3.158 (2.924,3.41) | <0.001 |
|-----|---------------------|--------|--------------------|--------|

---

For peer review only

**Table S10.** Univariable and multivariable logistic regressions for antihypertensive drugs taking among cardiologists with hypertension

| Variable        | Univariable logistic regression |        | Multivariable logistic regression |        |
|-----------------|---------------------------------|--------|-----------------------------------|--------|
|                 | OR (95%CI)                      | P      | OR (95%CI)                        | P      |
| Age (years)     |                                 |        |                                   |        |
| 20-29           | Reference                       |        | Reference                         |        |
| 30-39           | 1.514 (1.289,1.779)             | <0.001 | 1.433 (1.055,1.945)               | 0.021  |
| 40-49           | 2.375 (2.019,2.794)             | <0.001 | 1.989 (1.428,2.771)               | <0.001 |
| 50-59           | 2.881 (2.387,3.478)             | <0.001 | 2.282 (1.599,3.257)               | <0.001 |
| ≥60             | 3.775 (2.854,4.992)             | <0.001 | 2.677 (1.754,4.086)               | <0.001 |
| Gender          |                                 |        |                                   |        |
| Male            | Reference                       |        | Reference                         |        |
| Female          | 0.802 (0.723,0.889)             | <0.001 | 1.2 (1.059,1.359)                 | 0.004  |
| Academic degree |                                 |        |                                   |        |
| Junior college  | Reference                       |        | Reference                         |        |
| Bachelor        | 1.565 (0.905,2.708)             | 0.109  | 1.025 (0.553,1.901)               | 0.938  |

|    |                           |                     |        |                     |       |
|----|---------------------------|---------------------|--------|---------------------|-------|
| 1  |                           |                     |        |                     |       |
| 2  |                           |                     |        |                     |       |
| 3  |                           |                     |        |                     |       |
| 4  |                           |                     |        |                     |       |
| 5  | Master                    | 1.506 (0.87,2.607)  | 0.144  | 0.915 (0.491,1.705) | 0.780 |
| 6  |                           |                     |        |                     |       |
| 7  | Doctor                    | 1.809 (1.033,3.168) | 0.038  | 0.93 (0.492,1.757)  | 0.822 |
| 8  |                           |                     |        |                     |       |
| 9  | Post-doctor               | 2.46 (1.298,4.659)  | 0.006  | 1.092 (0.534,2.235) | 0.809 |
| 10 |                           |                     |        |                     |       |
| 11 | Others                    | 1.057 (0.596,1.876) | 0.849  | 1.428 (0.729,2.8)   | 0.299 |
| 12 |                           |                     |        |                     |       |
| 13 |                           |                     |        |                     |       |
| 14 | Hospital level            |                     |        |                     |       |
| 15 |                           |                     |        |                     |       |
| 16 | Primary                   | Reference           |        |                     |       |
| 17 |                           |                     |        |                     |       |
| 18 | Secondary                 | 1.302 (0.888,1.909) | 0.177  |                     |       |
| 19 |                           |                     |        |                     |       |
| 20 | Tertiary                  | 1.142 (0.781,1.669) | 0.495  |                     |       |
| 21 |                           |                     |        |                     |       |
| 22 | Others                    | 1.451 (0.794,2.649) | 0.226  |                     |       |
| 23 |                           |                     |        |                     |       |
| 24 |                           |                     |        |                     |       |
| 25 | Professional title        |                     |        |                     |       |
| 26 |                           |                     |        |                     |       |
| 27 | General physician         | Reference           |        | Reference           |       |
| 28 |                           |                     |        |                     |       |
| 29 | Healer                    | 1.981 (1.342,2.925) | 0.001  | 1.233 (0.765,1.989) | 0.390 |
| 30 |                           |                     |        |                     |       |
| 31 | Resident physician        | 2.014 (1.486,2.73)  | <0.001 | 1.084 (0.736,1.596) | 0.684 |
| 32 |                           |                     |        |                     |       |
| 33 | Attending physician       | 1.783 (1.488,2.137) | <0.001 | 1.165 (0.878,1.546) | 0.290 |
| 34 |                           |                     |        |                     |       |
| 35 | Associate chief physician | 2.523 (2.074,3.068) | <0.001 | 1.24 (0.898,1.711)  | 0.192 |
| 36 |                           |                     |        |                     |       |
| 37 |                           |                     |        |                     |       |
| 38 |                           |                     |        |                     |       |
| 39 |                           |                     |        |                     |       |
| 40 |                           |                     |        |                     |       |
| 41 |                           |                     |        |                     |       |
| 42 |                           |                     |        |                     |       |
| 43 |                           |                     |        |                     |       |
| 44 |                           |                     |        |                     |       |
| 45 |                           |                     |        |                     |       |
| 46 |                           |                     |        |                     |       |

|    |                          |                     |        |                     |        |
|----|--------------------------|---------------------|--------|---------------------|--------|
| 1  |                          |                     |        |                     |        |
| 2  |                          |                     |        |                     |        |
| 3  |                          |                     |        |                     |        |
| 4  | Chief physician          | 3.185 (2.569,3.948) | <0.001 | 1.407 (0.993,1.992) | 0.055  |
| 5  |                          |                     |        |                     |        |
| 6  | Others                   | 1.161 (0.917,1.469) | 0.215  | 0.831 (0.562,1.23)  | 0.356  |
| 7  |                          |                     |        |                     |        |
| 8  |                          |                     |        |                     |        |
| 9  | BMI (kg/m <sup>2</sup> ) |                     |        |                     |        |
| 10 |                          |                     |        |                     |        |
| 11 | <18.5                    | 0.628 (0.464,0.852) | 0.003  | 0.78 (0.565,1.078)  | 0.132  |
| 12 |                          |                     |        |                     |        |
| 13 | 18.5-23.9                | Reference           |        | Reference           |        |
| 14 |                          |                     |        |                     |        |
| 15 | ≥24                      | 1.409 (1.272,1.561) | <0.001 | 1.157 (1.031,1.299) | 0.013  |
| 16 |                          |                     |        |                     |        |
| 17 |                          |                     |        |                     |        |
| 18 | Smoking                  |                     |        |                     |        |
| 19 |                          |                     |        |                     |        |
| 20 | Frequent                 | Reference           |        | Reference           |        |
| 21 |                          |                     |        |                     |        |
| 22 | Infrequent               | 0.446 (0.397,0.502) | <0.001 | 0.502 (0.44,0.572)  | <0.001 |
| 23 |                          |                     |        |                     |        |
| 24 | Never                    | 0.335 (0.293,0.383) | <0.001 | 0.374 (0.322,0.434) | <0.001 |
| 25 |                          |                     |        |                     |        |
| 26 |                          |                     |        |                     |        |
| 27 | Family history           |                     |        |                     |        |
| 28 |                          |                     |        |                     |        |
| 29 | No                       | Reference           |        | Reference           |        |
| 30 |                          |                     |        |                     |        |
| 31 | Yes                      | 0.485 (0.437,0.539) | <0.001 | 1.4 (1.247,1.571)   | <0.001 |
| 32 |                          |                     |        |                     |        |
| 33 |                          |                     |        |                     |        |
| 34 | Comorbidity              |                     |        |                     |        |
| 35 |                          |                     |        |                     |        |
| 36 | No                       | Reference           |        | Reference           |        |
| 37 |                          |                     |        |                     |        |
| 38 |                          |                     |        |                     |        |
| 39 |                          |                     |        |                     |        |
| 40 |                          |                     |        |                     |        |
| 41 |                          |                     |        |                     |        |
| 42 |                          |                     |        |                     |        |
| 43 |                          |                     |        |                     |        |
| 44 |                          |                     |        |                     |        |
| 45 |                          |                     |        |                     |        |
| 46 |                          |                     |        |                     |        |

1  
2  
3  
4  
5  
6  
7  
8  
9  
10  
11  
12  
13  
14  
15  
16  
17  
18  
19  
20  
21  
22  
23  
24  
25  
26  
27  
28  
29  
30  
31  
32  
33  
34  
35  
36  
37  
38  
39  
40  
41  
42  
43  
44  
45  
46

|     |                     |        |                     |        |
|-----|---------------------|--------|---------------------|--------|
| Yes | 3.185 (2.854,3.555) | <0.001 | 2.646 (2.351,2.977) | <0.001 |
|-----|---------------------|--------|---------------------|--------|

---

For peer review only

**Table S11.** Univariable and multivariable logistic regressions for reaching the target blood pressure among cardiologists taking antihypertensive drugs

| Variable        | Univariable logistic regression |        | Multivariable logistic regression |       |
|-----------------|---------------------------------|--------|-----------------------------------|-------|
|                 | OR (95%CI)                      | P      | OR (95%CI)                        | P     |
| Age (years)     |                                 |        |                                   |       |
| 20-29           | Reference                       |        | Reference                         |       |
| 30-39           | 0.824 (0.62,1.096)              | 0.183  | 0.689 (0.418,1.138)               | 0.146 |
| 40-49           | 0.761 (0.574,1.009)             | 0.058  | 0.667 (0.391,1.138)               | 0.137 |
| 50-59           | 0.518 (0.375,0.716)             | <0.001 | 0.465 (0.262,0.825)               | 0.009 |
| ≥60             | 0.655 (0.424,1.012)             | 0.057  | 0.549 (0.286,1.055)               | 0.072 |
| Gender          |                                 |        |                                   |       |
| Male            | Reference                       |        | Reference                         |       |
| Female          | 1.204 (1.012,1.432)             | 0.036  | 1.081 (0.896,1.304)               | 0.415 |
| Academic degree |                                 |        |                                   |       |
| Junior college  | Reference                       |        |                                   |       |

1  
2  
3  
4  
5  
6  
7  
8  
9  
10  
11  
12  
13  
14  
15  
16  
17  
18  
19  
20  
21  
22  
23  
24  
25  
26  
27  
28  
29  
30  
31  
32  
33  
34  
35  
36  
37  
38  
39  
40  
41  
42  
43  
44  
45  
46

|                     |                     |       |                     |       |
|---------------------|---------------------|-------|---------------------|-------|
| Bachelor            | 0.457 (0.172,1.211) | 0.115 |                     |       |
| Master              | 0.483 (0.182,1.282) | 0.144 |                     |       |
| Doctor              | 0.484 (0.179,1.306) | 0.152 |                     |       |
| Post-doctor         | 0.591 (0.198,1.762) | 0.345 |                     |       |
| Others              | 0.791 (0.286,2.192) | 0.652 |                     |       |
| Hospital level      |                     |       |                     |       |
| Primary             | Reference           |       | Reference           |       |
| Secondary           | 2.845 (1.29,6.275)  | 0.010 | 2.878 (1.287,6.438) | 0.01  |
| Tertiary            | 2.573 (1.171,5.655) | 0.019 | 2.558 (1.147,5.704) | 0.022 |
| Others              | 2.578 (0.863,7.701) | 0.090 | 2.179 (0.714,6.646) | 0.171 |
| Professional title  |                     |       |                     |       |
| General physician   | Reference           |       | Reference           |       |
| Healer              | 1.308 (0.681,2.514) | 0.420 | 1.697 (0.8,3.603)   | 0.168 |
| Resident physician  | 1.956 (1.167,3.28)  | 0.011 | 2.768 (1.467,5.225) | 0.002 |
| Attending physician | 1.187 (0.856,1.646) | 0.304 | 1.585 (0.982,2.558) | 0.059 |

|                               |                     |        |                     |        |
|-------------------------------|---------------------|--------|---------------------|--------|
| Associate chief physician     | 0.845 (0.596,1.196) | 0.341  | 1.271 (0.747,2.16)  | 0.376  |
| Chief physician               | 0.947 (0.655,1.369) | 0.772  | 1.623 (0.928,2.837) | 0.089  |
| Others                        | 1.65 (1.081,2.519)  | 0.020  | 1.599 (1.036,2.469) | 0.034  |
| <b>BMI (kg/m<sup>2</sup>)</b> |                     |        |                     |        |
| <18.5                         | 0.973 (0.566,1.673) | 0.922  | 0.872 (0.5,1.521)   | 0.629  |
| 18.5-23.9                     | Reference           |        | Reference           |        |
| ≥24                           | 0.621 (0.524,0.738) | <0.001 | 0.657 (0.548,0.787) | <0.001 |
| <b>Smoking</b>                |                     |        |                     |        |
| Frequent                      | Reference           |        |                     |        |
| Infrequent                    | 0.936 (0.777,1.128) | 0.489  |                     |        |
| Never                         | 1.022 (0.819,1.275) | 0.848  |                     |        |
| <b>Family history</b>         |                     |        |                     |        |
| No                            | Reference           |        |                     |        |
| Yes                           | 1.445 (1.219,1.713) | <0.001 | 0.746 (0.624,0.891) | 0.001  |
| <b>Comorbidity</b>            |                     |        |                     |        |



1  
2  
3  
4  
5  
6  
7  
8  
9  
10  
11  
12  
13  
14  
15  
16  
17  
18  
19  
20  
21  
22  
23  
24  
25  
26  
27  
28  
29  
30  
31  
32  
33  
34  
35  
36  
37  
38  
39  
40  
41  
42  
43  
44  
45  
46

|     |                    |       |                    |       |
|-----|--------------------|-------|--------------------|-------|
| No  | Reference          |       |                    |       |
| Yes | 0.811 (0.685,0.96) | 0.015 | 0.811 (0.679,0.97) | 0.022 |

---

For peer review only

**STROBE Statement**

Checklist of items that should be included in reports of observational studies

| Section/Topic                                                                                      | Item No | Recommendation                                                                                                                                                                             | Reported on Page No |
|----------------------------------------------------------------------------------------------------|---------|--------------------------------------------------------------------------------------------------------------------------------------------------------------------------------------------|---------------------|
| <b>Title and abstract</b>                                                                          | 1       | (a) Indicate the study's design with a commonly used term in the title or the abstract                                                                                                     | 1                   |
|                                                                                                    |         | (b) Provide in the abstract an informative and balanced summary of what was done and what was found                                                                                        | 2-3                 |
| <b>Introduction</b>                                                                                |         |                                                                                                                                                                                            |                     |
| Background/rationale                                                                               | 2       | Explain the scientific background and rationale for the investigation being reported                                                                                                       | 4-5                 |
| Objectives                                                                                         | 3       | State specific objectives, including any prespecified hypotheses                                                                                                                           | 5                   |
| <b>Methods</b>                                                                                     |         |                                                                                                                                                                                            |                     |
| Study design                                                                                       | 4       | Present key elements of study design early in the paper                                                                                                                                    | 5                   |
| Setting                                                                                            | 5       | Describe the setting, locations, and relevant dates, including periods of recruitment, exposure, follow-up, and data collection                                                            | 5                   |
| Participants                                                                                       | 6       | (a) <i>Cohort study</i> —Give the eligibility criteria, and the sources and methods of selection of participants. Describe methods of follow-up                                            | 5                   |
|                                                                                                    |         | <i>Case-control study</i> —Give the eligibility criteria, and the sources and methods of case ascertainment and control selection. Give the rationale for the choice of cases and controls |                     |
|                                                                                                    |         | <i>Cross-sectional study</i> —Give the eligibility criteria, and the sources and methods of selection of participants                                                                      |                     |
| Variables                                                                                          | 7       | (b) <i>Cohort study</i> —For matched studies, give matching criteria and number of exposed and unexposed                                                                                   | 5                   |
|                                                                                                    |         | <i>Case-control study</i> —For matched studies, give matching criteria and the number of controls per case                                                                                 |                     |
| Data sources/measurement                                                                           | 8*      | Clearly define all outcomes, exposures, predictors, potential confounders, and effect modifiers. Give diagnostic criteria, if applicable                                                   | 5                   |
| Bias                                                                                               | 9       | For each variable of interest, give sources of data and details of methods of assessment (measurement). Describe comparability of assessment methods if there is more than one group       | 6                   |
| Study size                                                                                         | 10      | Describe any efforts to address potential sources of bias                                                                                                                                  | 6                   |
| Quantitative variables                                                                             | 11      | Explain how the study size was arrived at                                                                                                                                                  | 6                   |
| Statistical methods                                                                                | 12      | Explain how quantitative variables were handled in the analyses. If applicable, describe which groupings were chosen and why                                                               | 6                   |
|                                                                                                    |         | (a) Describe all statistical methods, including those used to control for confounding                                                                                                      | 7                   |
|                                                                                                    |         | (b) Describe any methods used to examine subgroups and interactions                                                                                                                        | 7                   |
|                                                                                                    |         | (c) Explain how missing data were addressed                                                                                                                                                | 7                   |
|                                                                                                    |         | (d) <i>Cohort study</i> —If applicable, explain how loss to follow-up was addressed                                                                                                        | 7                   |
| <i>Case-control study</i> —If applicable, explain how matching of cases and controls was addressed |         |                                                                                                                                                                                            |                     |
|                                                                                                    |         | <i>Cross-sectional study</i> —If applicable, describe analytical methods taking account of sampling strategy                                                                               | 7                   |
|                                                                                                    |         | (e) Describe any sensitivity analyses                                                                                                                                                      | 7                   |

| Section/Topic            | Item No | Recommendation                                                                                                                                                                                               | Reported on Page No |
|--------------------------|---------|--------------------------------------------------------------------------------------------------------------------------------------------------------------------------------------------------------------|---------------------|
| <b>Results</b>           |         |                                                                                                                                                                                                              |                     |
| Participants             | 13*     | (a) Report numbers of individuals at each stage of study—eg numbers potentially eligible, examined for eligibility, confirmed eligible, included in the study, completing follow-up, and analysed            | 8                   |
|                          |         | (b) Give reasons for non-participation at each stage                                                                                                                                                         |                     |
|                          |         | (c) Consider use of a flow diagram                                                                                                                                                                           |                     |
| Descriptive data         | 14*     | (a) Give characteristics of study participants (eg demographic, clinical, social) and information on exposures and potential confounders                                                                     | 8                   |
|                          |         | (b) Indicate number of participants with missing data for each variable of interest                                                                                                                          |                     |
|                          |         | (c) <i>Cohort study</i> —Summarise follow-up time (eg, average and total amount)                                                                                                                             |                     |
| Outcome data             | 15*     | <i>Cohort study</i> —Report numbers of outcome events or summary measures over time                                                                                                                          |                     |
|                          |         | <i>Case-control study</i> —Report numbers in each exposure category, or summary measures of exposure                                                                                                         |                     |
|                          |         | <i>Cross-sectional study</i> —Report numbers of outcome events or summary measures                                                                                                                           | 9-11                |
| Main results             | 16      | (a) Give unadjusted estimates and, if applicable, confounder-adjusted estimates and their precision (eg, 95% confidence interval). Make clear which confounders were adjusted for and why they were included | 9-11                |
|                          |         | (b) Report category boundaries when continuous variables were categorized                                                                                                                                    |                     |
|                          |         | (c) If relevant, consider translating estimates of relative risk into absolute risk for a meaningful time period                                                                                             |                     |
| Other analyses           | 17      | Report other analyses done—eg analyses of subgroups and interactions, and sensitivity analyses                                                                                                               |                     |
| <b>Discussion</b>        |         |                                                                                                                                                                                                              |                     |
| Key results              | 18      | Summarise key results with reference to study objectives                                                                                                                                                     | 11-14               |
| Limitations              | 19      | Discuss limitations of the study, taking into account sources of potential bias or imprecision. Discuss both direction and magnitude of any potential bias                                                   | 14                  |
| Interpretation           | 20      | Give a cautious overall interpretation of results considering objectives, limitations, multiplicity of analyses, results from similar studies, and other relevant evidence                                   | 14-15               |
| Generalisability         | 21      | Discuss the generalisability (external validity) of the study results                                                                                                                                        | 14-15               |
| <b>Other Information</b> |         |                                                                                                                                                                                                              |                     |
| Funding                  | 22      | Give the source of funding and the role of the funders for the present study and, if applicable, for the original study on which the present article is based                                                | 15                  |

\*Give information separately for cases and controls in case-control studies and, if applicable, for exposed and unexposed groups in cohort and cross-sectional studies.

**Note:** An Explanation and Elaboration article discusses each checklist item and gives methodological background and published examples of transparent reporting. The STROBE checklist is best used in conjunction with this article (freely available on the Web sites of PLoS Medicine at <http://www.plosmedicine.org/>, Annals of Internal Medicine at <http://www.annals.org/>, and Epidemiology at <http://www.epidem.com/>). Information on the STROBE Initiative is available at [www.strobe-statement.org](http://www.strobe-statement.org).

# BMJ Open

## Perception and self-management of hypertension in Chinese cardiologists (CCHS): a multicenter, large-scale cross-sectional study

|                                 |                                                                                                                                                                                                                                                                                                                                                                                                                                                                                                                                                                                                                                                                                                                                                                                                                             |
|---------------------------------|-----------------------------------------------------------------------------------------------------------------------------------------------------------------------------------------------------------------------------------------------------------------------------------------------------------------------------------------------------------------------------------------------------------------------------------------------------------------------------------------------------------------------------------------------------------------------------------------------------------------------------------------------------------------------------------------------------------------------------------------------------------------------------------------------------------------------------|
| Journal:                        | <i>BMJ Open</i>                                                                                                                                                                                                                                                                                                                                                                                                                                                                                                                                                                                                                                                                                                                                                                                                             |
| Manuscript ID                   | bmjopen-2019-029249.R2                                                                                                                                                                                                                                                                                                                                                                                                                                                                                                                                                                                                                                                                                                                                                                                                      |
| Article Type:                   | Research                                                                                                                                                                                                                                                                                                                                                                                                                                                                                                                                                                                                                                                                                                                                                                                                                    |
| Date Submitted by the Author:   | 05-Aug-2019                                                                                                                                                                                                                                                                                                                                                                                                                                                                                                                                                                                                                                                                                                                                                                                                                 |
| Complete List of Authors:       | Hou, Lei ; Shanghai Institute of Cardiovascular Diseases, Zhongshan Hospital, Fudan University, Department of Cardiology; Tongren hospital, Shanghai Jiaotong University, School of Medicine, Department of Cardiology<br>Jin, Xuejuan ; Shanghai Institute of Cardiovascular Diseases, Zhongshan Hospital, Fudan University, Department of Cardiology<br>Ma, Jianying ; Shanghai Institute of Cardiovascular Diseases, Zhongshan Hospital, Fudan University, Department of Cardiology<br>Qian, Juying; Shanghai Institute of Cardiovascular Diseases, Zhongshan Hospital, Fudan University, Department of Cardiology<br>Huo, Yong ; Peking University First Hospital, Department of Cardiology<br>Ge, Junbo; Shanghai Institute of Cardiovascular Diseases, Zhongshan Hospital, Fudan University, Department of Cardiology |
| <b>Primary Subject Heading</b>: | Cardiovascular medicine                                                                                                                                                                                                                                                                                                                                                                                                                                                                                                                                                                                                                                                                                                                                                                                                     |
| Secondary Subject Heading:      | Cardiovascular medicine                                                                                                                                                                                                                                                                                                                                                                                                                                                                                                                                                                                                                                                                                                                                                                                                     |
| Keywords:                       | health survey, cardiovascular diseases, China, cardiologists, cross-sectional studies                                                                                                                                                                                                                                                                                                                                                                                                                                                                                                                                                                                                                                                                                                                                       |
|                                 |                                                                                                                                                                                                                                                                                                                                                                                                                                                                                                                                                                                                                                                                                                                                                                                                                             |

SCHOLARONE™  
Manuscripts

1  
2  
3  
4 **Perception and self-management of hypertension in Chinese cardiologists (CCHS): a**  
5 **multicenter, large-scale cross-sectional study**  
6  
7  
8  
9  
10

11 **Running title:** The China Cardiologist Heart Study  
12  
13  
14

15 Lei Hou<sup>1,2¶</sup>, Xuejuan Jin<sup>1¶</sup>, Jianying Ma<sup>1</sup>, Juying Qian<sup>1</sup>, Yong Huo<sup>3</sup>, Junbo Ge<sup>1</sup>  
16  
17  
18  
19

20 <sup>1</sup>Department of Cardiology, Shanghai Institute of Cardiovascular Diseases, Zhongshan  
21 Hospital, Fudan University, Shanghai, China  
22  
23

24 <sup>2</sup>Department of Cardiology, Tongren Hospital, Shanghai Jiaotong University, School of  
25 Medicine, Shanghai, China  
26  
27

28 <sup>3</sup>Department of Cardiology, Peking University First Hospital, Beijing, China  
29  
30

31 <sup>¶</sup>These authors contributed equally to this work.  
32  
33  
34  
35

36 **Corresponding author:** Junbo Ge, No. 180 Fenglin Road, 200032, Department of  
37 Cardiology, Shanghai Institute of Cardiovascular Diseases, Zhongshan Hospital, Fudan  
38 University, Shanghai, China. Email: gejunbo@126.com  
39  
40  
41  
42  
43  
44  
45  
46  
47  
48  
49  
50  
51  
52  
53  
54  
55  
56  
57  
58  
59  
60

## ABSTRACT

**Objectives:** To determine the frequency of risk factors for hypertension among Chinese cardiologists using a nationwide survey.

**Design:** Multicenter, cross-sectional observational study.

**Setting:** 2441 hospitals across China were surveyed between September 2016 and August 2017.

**Participants:** All in-service cardiologists were surveyed (n=28,924).

**Interventions:** WeChat-based electronic data capture system, a social application in China (Tencent, Nanshan, China), was used for data acquisition. Physician subscribed to the WeChat official account of the China Cardiologist Heart Study, and filled out an online questionnaire that included age, gender, level of in-service hospital, professional title, academic degree, area of expertise, and cardiovascular risk factors. All information was required.

**Primary and secondary outcome measures:** The primary outcome was the presence of cardiovascular risk factors. The secondary outcome was the impact of the risk factors on the occurrence of hypertension.

**Results:** Among 28,924 Chinese cardiologists who completed the questionnaire, 57.6% had blood pressure of 130-139/80-89 mmHg (5.3% were taking antihypertensive drugs) and 22.0% had blood pressure  $\geq 140/\geq 90$  mmHg (36.5% were taking antihypertensive drugs). The multivariable analysis showed that age, gender, academic degree, hospital level, body mass index (BMI), smoking, and comorbidities were independently associated with hypertension among cardiologists (all  $P < 0.05$ ). Age, female gender, BMI, smoking, family history of cardiovascular diseases, and comorbidities were independently associated with

1  
2  
3  
4 taking antihypertensive drugs among hypertensive cardiologists (all  $P < 0.05$ ). Age, hospital  
5 level, professional title, BMI, family history of cardiovascular diseases, and comorbidities  
6 were independently associated with reaching target blood pressure among hypertensive  
7 cardiologists taking antihypertensive drugs.  
8  
9  
10  
11  
12

13 **Conclusion:** Chinese cardiologists do not recognize and pay attention to their own blood  
14 pressure. Their rate of antihypertensive treatment was low. The identified risk factors could  
15 be used to identify cardiologists at higher risk for hypertension and for implementing  
16 preventive interventions.  
17  
18  
19  
20  
21  
22  
23

24 **Keywords:** health survey; cardiovascular diseases; China; cardiologists; cross-sectional  
25 studies.  
26  
27  
28  
29  
30  
31

### 32 **Strengths and limitations of this study**

- 33 - The strength of the present study lies in its large sample size (>26,000 participants) from  
34 all across China.  
35
- 36 - Because of funding and logistics, data had to be collected using a self-filled survey, which  
37 could introduce bias compared with a formal epidemiological study.  
38
- 39 - The medical system in China and the formation required to work in cardiology are  
40 different from that of other countries, limiting the generalizability of the data.  
41
- 42 - The geographical distribution of the cardiologists across China was not taken into account.  
43  
44  
45  
46  
47  
48  
49  
50  
51  
52  
53  
54  
55  
56  
57  
58  
59  
60

## INTRODUCTION

Cardiologists are exposed to threats to their health, resulting in an important incidence of orthopedic problems [1 2]. In addition, there is a risk of radiation-related diseases [2 3]. Besides those obvious occupational hazards, cardiologists are exposed to stress, work overload, and bad lifestyle habits that may increase their cardiovascular risk [4 5], and this is observed in Chinese cardiologists [6 7]. A study from Italy showed that the cardiovascular profile of Italian cardiologists was far from ideal and that the perception of their own risk factors was low [4 8]. The understanding and awareness of cardiologists' perception of their own health are not only important for maintaining individual health and the manpower of the national medical health care system, but also directly affect their understanding and behaviors toward the patients, eventually having some impact on the prevention and treatment of cardiovascular diseases (CVDs). Indeed, for many patients, cardiologists are role models for behavioral changes [9-11]. Cardiologists' knowledge about CVD risk factors and their perception of how they treat their patients with CVD risk factors have an impact on their perception of their own risk factors [12].

Chinese physicians face a large number of patients and are at risk of job turnover [13]. A survey of Chinese cardiologists found that there were only 1.9 cardiologists per 100,000 people [6], compared with 8.1 per 100,000 people in the United States in 2009 [7]. Hence, cardiologists in China have heavy responsibilities and high work burden. Faced with such a disparity in the proportion of cardiologists and patients, the working time of Chinese doctors usually exceeds the standard working time [14]. All those factors may lead to an increase in the incidence of cardiovascular risk factors and diseases among Chinese cardiologists. Indeed, comparing the Physicians' Health Study from the United States with



1  
2  
3  
4 the Chinese Cardiovascular Risk Evaluation (CARE) study [15 16], it was found that the  
5 prevalence of cardiovascular risk factors among Chinese cardiologists was higher than  
6 among American physicians, and that Chinese cardiologists had a poor perception of their  
7 own cardiovascular risk factors. Hypertension is a major risk factor for cardiovascular  
8 diseases and death in China [17], as well as in the world in general [18 19]. Hypertension  
9 may arise due to adverse life style habits (tobacco, alcohol, caffeine, and salty foods) [20],  
10 but also due to chronic stress, work pressure, and lack of sleep [21-25].

11  
12  
13  
14  
15  
16  
17  
18  
19  
20 A recent anecdotic observation is that sudden death was observed in many young Chinese  
21 cardiologists, prompting the hypothesis that Chinese cardiologists may neglect their own  
22 health. In addition, as stated above, Chinese cardiologists are likely to display risk factors  
23 of hypertension, which will have a certain impact on their health. Nevertheless, the factors  
24 for poor cardiovascular factors among cardiologists must first be identified and understood  
25 before interventions can be implemented. Therefore, the present study aimed to examine  
26 the risk factors for hypertension among Chinese cardiologists using a nationwide survey.  
27  
28  
29  
30  
31  
32  
33  
34  
35  
36  
37  
38

## 39 **SUBJECTS AND METHODS**

### 40 **Participants**

41  
42 This was a national, multicenter, cross-sectional observational study. Cardiologists from  
43 2441 hospitals across China were surveyed between September 2016 and August 2017. All  
44 in-service cardiologists were eligible. If a hospital did not have a department of cardiology  
45 and only had a department of internal medicine, then the internists working in the  
46 cardiovascular field were included. Physicians who were unwilling to participate in this  
47 survey were excluded. This study was approved by the Ethics Committee of Tongren  
48  
49  
50  
51  
52  
53  
54  
55  
56  
57  
58  
59  
60

1  
2  
3  
4 Hospital, Shanghai Jiaotong University, School of Medicine (approval number: 2015-017-  
5  
6 01). All physicians signed the informed consent form before completing the questionnaire.  
7

### 8 9 **Sampling method**

10  
11 Due to the study funding and lack of manpower, it was difficult to design a sampling frame  
12  
13 according to the economic and hospital levels and randomly select hospitals nationwide.  
14  
15 Hence, the study used a two-stage sampling process. In the first stage, hospitals were  
16  
17 selected using non-random stratification according to regional economic and hospital levels.  
18  
19 In the second stage, a random proportional sample from authoritative lists was created, and  
20  
21 all the cardiologists in this sample of hospitals were invited to participate in the study.  
22  
23

### 24 25 **Questionnaire**

26  
27 The study was carried out and coordinated under the guidance of a scientific advisory board.  
28  
29 Data quality was monitored by the study coordinators throughout the study.  
30  
31 WeChat-based electronic data capture (EDC) system, a social application in China (Tencent,  
32  
33 Nanshan, China), was used for data acquisition. Physician subscribed to the WeChat  
34  
35 official account of the China Cardiologist Heart Study (Wuxi Boyankang Technology  
36  
37 Development Co., Ltd. was responsible for platform construction and data management),  
38  
39 and filled out an online questionnaire that included age, gender, level of hospital,  
40  
41 professional title (general physicians were those with a bachelor degree; healer were those  
42  
43 with a junior college degree or below), academic degree, area of expertise, height, body  
44  
45 weight, blood pressure, heart rate, fasting blood glucose, total cholesterol (TC), low density  
46  
47 lipoprotein-cholesterol (LDL-C), high density lipoprotein-cholesterol (HDL-C), triglyceride  
48  
49 (TG), current diseases, medication status, smoking history, and family history. The  
50  
51 questions about area of expertise and current diseases had multiple choices. All information  
52  
53  
54  
55  
56  
57  
58  
59  
60

1  
2  
3  
4 was required. Questionnaires with incomplete information could not be submitted. There  
5  
6 were logically possible upper and lower limits for the content to be filled in. If the limit was  
7  
8 exceeded, it could indicate that the data was incorrect. The staff of the project team would  
9  
10 remind the physician to check. The questionnaire is shown in Appendix 1.  
11  
12

### 13 **Data collection**

14  
15 Demographic variables and risk factors for CVD were assessed according to standardized  
16  
17 study protocols. Age was automatically generated based on the birth date. Blood pressure  
18  
19 and heart rate were the average levels over the past 2 weeks. Fasting blood glucose and  
20  
21 blood lipids were reviewed by the physician for the most recent results within a year. Body  
22  
23 mass index (BMI) was calculated based on weight and height as kg/m<sup>2</sup>. Hypertension was  
24  
25 defined as systolic blood pressure  $\geq 140$  mmHg or diastolic blood pressure  $\geq 90$  mmHg or  
26  
27 taking antihypertensive drugs. Reaching the target blood pressure was defined as systolic  
28  
29 blood pressure  $< 140$  mmHg and diastolic blood pressure  $< 90$  mmHg. Smoking history was  
30  
31 defined as at least one cigarette/day in the past 3 months (yes, no, never smoking). Family  
32  
33 history was defined as first-degree male relative with a CVD at  $< 55$  years of age or a first-  
34  
35 degree female relative with a CVD at  $< 65$  years of age.  
36  
37  
38  
39  
40

### 41 **Statistical analysis**

42  
43 All data were analyzed using SPSS 22.0 (IBM, Armonk, NY, USA). Continuous variables  
44  
45 that followed the normal distribution were expressed as means  $\pm$  standard deviation (SD),  
46  
47 and skewed continuous variables were summarized as medians (interquartile range).  
48  
49 Categorical variables were expressed as frequencies (percentage) and chi-square tests were  
50  
51 used for comparison between groups. Univariable and multivariable logistic regression  
52  
53 analyses were used to analyze the factors influencing the prevalence of hypertension, rate  
54  
55  
56  
57  
58  
59  
60

1  
2  
3  
4 of medicine taking, and rate of reaching the target blood pressure. For the multivariable  
5  
6 analysis, comorbidity was defined as the presence of any other disease, or taking  
7  
8 antidiabetic or lipid-lowering drugs. Two-sided  $P < 0.05$  was considered as statistically  
9  
10 significant.  
11

### 12 13 **Patient and Public Involvement statement**

14  
15  
16 Patients were not involved in the study design and implementation.  
17

## 18 19 20 **RESULTS**

### 21 22 **Characteristics of the participants**

23  
24  
25 A total of 30,000 cardiologists across China were invited to participate in this survey, and  
26  
27 28,924 completed the questionnaire, for a response rate of 96.4%. Tables 1 and 2 and  
28  
29 Supplementary Table S1 present their characteristics. Most (42.7%) were 30-39 years old,  
30  
31 male (54.5%), with a bachelor degree (43.9%), working at a tertiary hospital (60.1%), and  
32  
33 were attending physicians (46.5%). Their main areas of expertise were: hypertension  
34  
35 (63.9%), atherosclerosis and coronary artery diseases (51.1%), blood lipids and metabolism  
36  
37 (35.1%), and heart failure (31.4%). Most had a BMI of 18.5-23.9 kg/m<sup>2</sup> (66.7%), fasting  
38  
39 blood glucose  $< 6.1$  mmol/L (90.0%), LDL-C  $< 2.60$  mmol/L (44.6%), HDL-C  $\geq 1.0$  mmol/L  
40  
41 (93.5%), TC  $< 5.2$  mmol/L (86.3%), and TG  $< 1.7$  mmol/L (53.8%). Among them, 57.6%  
42  
43 had blood pressure of 130-139/80-89 mmHg (5.3% were taking antihypertensive drugs) and  
44  
45 22.0% had blood pressure  $\geq 140/\geq 90$  mmHg (36.5% were taking antihypertensive drugs).  
46  
47  
48 Among all cardiologists, 37.0% never smoked, 78.2% had a family history of CVDs, 25.3%  
49  
50 had hypertension, and 8.0% were taking antihypertensive drugs.  
51  
52  
53

### 54 55 **Gender differences in the prevalence of hypertension in Chinese cardiologists**

1  
2  
3  
4 Hypertension was more prevalent in male cardiologists than in females ( $P<0.001$ ) (Table 3).  
5  
6 More male cardiologists were taking antihypertensive drugs (33.5% vs. 28.8%,  $P<0.001$ ),  
7  
8 but more female cardiologists achieved the target blood pressure (44.3% vs. 39.8%,  
9  
10  $P=0.036$ ).  
11  
12

### 13 **Age differences in the prevalence of hypertension in Chinese cardiologists**

14  
15 Table 4 shows that hypertension was more prevalent in the older age groups ( $P<0.001$ ). The  
16  
17 highest proportions of cardiologists taking antihypertensive drugs were found in the 50-59  
18  
19 (42.0%) and 60-69 (48.8%) years age groups. The highest proportions of cardiologists  
20  
21 reaching the target blood pressure were found in the 20-29 (48.4%), 30-39 (43.6%), and 40-  
22  
23 49 (41.7%) years age groups. Supplementary Tables S2 and S3 show that similar patterns  
24  
25 were observed when the analyses were performed by gender.  
26  
27  
28

### 29 **Hospital level differences in the prevalence of hypertension in Chinese cardiologists**

30  
31 Table 5 shows that the prevalence of hypertension was higher in cardiologists working at  
32  
33 primary hospitals (35.7%) compared with secondary (24.9%) and tertiary (25.4%) hospitals  
34  
35 ( $P<0.001$ ). The proportions of cardiologists taking antihypertensive drugs and reaching the  
36  
37 target blood pressure were higher in secondary and tertiary hospitals (both  $P<0.05$ ). Similar  
38  
39 patterns could be observed when analyzing male and female cardiologists (Supplementary  
40  
41 Tables S4 and S5).  
42  
43  
44

### 45 **Professional title differences in the prevalence of hypertension in Chinese cardiologists**

46  
47 Hypertension was more prevalent in associate chief physicians and chief physicians  
48  
49 ( $P<0.001$ ), with a correspondingly higher proportion of cardiologists taking  
50  
51 antihypertensive drugs ( $P<0.001$ ). Residents, healers, and attending physicians had the  
52  
53  
54  
55  
56  
57  
58  
59  
60

1  
2  
3  
4 highest proportions of cardiologists achieving the target blood pressure ( $P<0.001$ )  
5  
6 (Supplementary Table S6). Globally, similar patterns were observed when analyzing the  
7  
8 data by male and female cardiologists (Supplementary Tables S7 and S8).  
9

### 10 **Factors associated with hypertension among cardiologists**

11  
12 Table S9 presents the univariable and multivariable analyses of the factors associated with  
13  
14 hypertension among Chinese cardiologists. Age (50-59 years: odds ratio [OR]=1.397, 95%  
15  
16 confidence interval [CI]: 1.164-1.678,  $P<0.001$ ;  $\geq 60$  years: OR=1.949, 95%CI: 1.534-2.476,  
17  
18  $P<0.001$  vs. 20-29 years), female gender (OR=0.866, 95%CI: 0.813-0.924,  $P<0.001$  vs.  
19  
20 male), academic degree (bachelor: OR=0.629, 95%CI: 0.461-0.859,  $P=0.004$ ; master:  
21  
22 OR=0.722, 95%CI: 0.528-0.988,  $P=0.04$  vs. junior college), hospital level (secondary:  
23  
24 OR=0.582, 95%CI: 0.464-0.728,  $P<0.001$ ; tertiary: OR=0.579, 95%CI: 0.463-0.724,  
25  
26  $P<0.001$  vs. primary), BMI ( $\geq 24$  kg/m<sup>2</sup>: OR=1.314, 95%CI: 1.233-1.400,  $P<0.001$  vs. 18.5-  
27  
28 23.9 kg/m<sup>2</sup>), smoking (infrequent: OR=0.568, 95%CI: 0.525-0.613,  $P<0.001$ ; never:  
29  
30 OR=0.469, 95%CI: 0.431-0.509,  $P<0.001$  vs. frequent), and comorbidities (OR=3.158,  
31  
32 95%CI: 2.924-3.410,  $P<0.001$ ) were independently associated with hypertension among  
33  
34 cardiologists.  
35  
36  
37  
38  
39  
40

### 41 **Factors associated with taking antihypertensive drugs among hypertensive** 42 **cardiologists**

43  
44 Table S10 presents the univariable and multivariable analyses of the factors associated with  
45  
46 taking antihypertensive drugs among hypertensive cardiologists. Age (30-39 years:  
47  
48 OR=1.433, 95%CI: 1.055-1.945,  $P=0.02$ ; 40-49 years: OR=1.989, 95%CI: 1.428-2.771,  
49  
50  $P<0.001$ ; 50-59 years: OR=2.282, 95%CI: 1.599-3.257,  $P<0.001$ ;  $\geq 60$  years: OR=2.677,  
51  
52 95%CI: 1.754-4.086,  $P<0.001$  vs. 20-29 years), female gender (OR=1.200, 95%CI: 1.059-  
53  
54  
55  
56  
57  
58  
59  
60

1  
2  
3  
4 1.359, P=0.004 vs. male), BMI ( $\geq 24$  kg/m<sup>2</sup>: OR=1.157, 95%CI: 1.031-1.299, P=0.01 vs.  
5  
6 18.5-23.9 kg/m<sup>2</sup>), smoking (infrequent: OR=0.502, 95%CI: 0.440-0.572, P<0.001; never:  
7  
8 OR=0.374, 95%CI: 0.322-0.434, P<0.001 vs. frequent), family history of CVDs  
9  
10 (OR=1.400, 95%CI: 1.247-1.571, P<0.001), and comorbidities (OR=2.646, 95%CI: 2.351-  
11  
12 2.977, P<0.001) were independently associated with taking antihypertensive drugs among  
13  
14 hypertensive cardiologists.  
15  
16

### 17 **Factors associated with reaching target blood pressure among hypertensive** 18 **cardiologists taking antihypertensive drugs** 19 20 21

22 Table S11 presents the univariable and multivariable analyses of the factors associated with  
23  
24 reaching target blood pressure among hypertensive cardiologists taking antihypertensive  
25  
26 drugs. Age (50-59 years: OR=0.465, 95%CI: 0.262-0.825, P=0.009 vs. 20-29 years),  
27  
28 hospital level (secondary: OR=2.878, 95%CI: 1.287-6.438, P=0.01; tertiary: OR=2.558,  
29  
30 95%CI: 1.147-5.704, P=0.02 vs. primary), professional title (residents: OR=2.768, 95%CI:  
31  
32 1.467-5.225, P=0.002 vs. general physicians), BMI ( $\geq 24$  kg/m<sup>2</sup>: OR=0.657, 95%CI: 0.548-  
33  
34 0.787, P<0.001 vs. 18.5-23.9 kg/m<sup>2</sup>), family history of CVDs (OR=0.746, 95%CI: 0.624-  
35  
36 0.891, P=0.001), and comorbidities (OR=0.811, 95%CI: 0.679-0.970, P=0.02) were  
37  
38 independently associated with reaching target blood pressure among hypertensive  
39  
40 cardiologists taking antihypertensive drugs.  
41  
42  
43  
44  
45  
46  
47

## 48 **DISCUSSION** 49

50 Chinese cardiologists have a poor knowledge of their own cardiovascular risk factors. The  
51  
52 present study aimed to examine the risk factors for hypertension among Chinese  
53  
54 cardiologists using a nationwide survey. The results suggest that Chinese cardiologists do  
55  
56  
57  
58  
59  
60

1  
2  
3  
4 not recognize and pay attention to their own blood pressure. Their rate of taking  
5  
6 antihypertensive drugs was low. The identified risk factors could be used to identify  
7  
8 cardiologists at higher risk for hypertension and for implementing preventive interventions.  
9  
10 In China, the prevalence of hypertension is around 24% [26-28], leading to a significant  
11  
12 cardiovascular burden [29]. In the present study, the prevalence of hypertension was 25.3%,  
13  
14 similar to the prevalence in the general Chinese population. A previous survey of  
15  
16 cardiologists conducted in 2011 revealed participants' characteristics that were similar to  
17  
18 those of the present study [6], further supporting the representativeness of our sample. Of  
19  
20 course, there is a certain overlap between the samples of the two studies, but the exact  
21  
22 extent of this overlap cannot be confirmed.  
23  
24  
25

26  
27 In the present study, 57.6% of the cardiologists had borderline or at-risk blood pressure  
28  
29 (130-139/80-89 mmHg) and only 5.3% were taking antihypertensive drugs. In addition,  
30  
31 22.0% had blood pressure  $\geq 140/\geq 90$  mmHg, but only 36.5% were taking antihypertensive  
32  
33 drugs. Despite the expected health knowledge in physicians compared with the general  
34  
35 population, this rate of treatment was surprisingly not better than in the general Chinese  
36  
37 population [30 31]. The SOCRATES study showed that the rate of using lipid-lowering,  
38  
39 antihypertensive, and cardiovascular drugs was low among Italian cardiologists [8],  
40  
41 supporting the present study. Data from the Chinese (CHARLS study) and the American  
42  
43 (NHANES study) general populations indicate that China had lower rates of hypertension  
44  
45 treatment than the USA [27]. This is also supported by the CARE study, which showed that  
46  
47 physicians had suboptimal awareness of their own cardiovascular risk, as well as  
48  
49 suboptimal use of prophylaxis [15 16], and by the SOCRATES study, which showed that  
50  
51 the self-awareness of cardiologists' own cardiovascular risk factors was low [8]. On the  
52  
53  
54  
55  
56  
57  
58  
59  
60



1  
2  
3  
4 other hand, Abuissa et al. [32] showed that American cardiologists had generally good  
5  
6 lifestyle habits.

7  
8 Age, gender, BMI, smoking, family history of CVDs, and comorbidities are well-known  
9  
10 risk factors for hypertension, compliance to treatment, and/or achieving target blood  
11  
12 pressure [33-35]. Aboyans et al. [11] showed that the awareness and management of  
13  
14 smoking cessation strategies among smoking French cardiologists were low. In the present  
15  
16 study, age, gender, BMI, smoking, and family history of CVDs were associated with the  
17  
18 risk of having hypertension, with the risk of not taking the proper antihypertensive  
19  
20 medication, and with the risk of not achieving the target blood pressure. Even if age, gender,  
21  
22 and comorbidities are non-modifiable risk factors, they could help identify cardiologists in  
23  
24 need of more efforts for seeking the proper cardiovascular treatments. This is supported by  
25  
26 previous studies in various populations [30 36 37].

27  
28  
29  
30  
31 Great efforts are necessary to become a cardiologist in Western countries, but because of  
32  
33 differences in the Chinese medical system, it takes less efforts to become a cardiologist in  
34  
35 China than in Western countries, a situation that is currently being corrected [6 38-40]. The  
36  
37 present study suggests that having a bachelor or master degree led to lower risk of  
38  
39 hypertension compared with junior college level. This could be due to the fact that people  
40  
41 with more advanced training possess more skills and knowledge, leading to less stress in  
42  
43 their work. In addition, they have higher income, decreasing the need for working long and  
44  
45 stressful hours. This is supported by a study that showed that physicians with a low  
46  
47 education level had poor quality of life in China [14]. As more experienced physicians can  
48  
49 have access to more advanced hospitals, we observed that cardiologists working in  
50  
51 secondary and tertiary hospitals had a lower risk of having hypertension. This could be due  
52  
53  
54  
55  
56  
57  
58  
59  
60

1  
2  
3  
4 to a better awareness of health knowledge in general, but also to the better material and  
5 human resources in more advanced hospitals, hereby lowering stress and workload [14 41].  
6  
7  
8  
9 Workload was not directly collected in the present study, but previous studies reported that  
10 it is higher in China than in the USA, with 1.9 vs. 8.1 cardiologists per 100,000 people [6 7].  
11  
12  
13 Considering the large sample size in the present study, it is probable that our study  
14 population follows the national trend. One study showed that the working hours of  
15 American physicians were decreasing over the years [42]. It has been shown that working  
16 long hours was associated with an increased cardiovascular risk [43]. Better knowledge and  
17 lower stress/workload can also be associated with being properly treated or not for  
18 hypertension and taking the proper steps, both on the medical and lifestyle points of view,  
19 to achieve the blood pressure targets, as observed in the present study. This is supported by  
20 a number of studies in the Chinese general population [30 31 44 45].  
21  
22  
23  
24  
25  
26  
27  
28  
29  
30

31  
32 The strength of the present study lies in its large sample size (>26,000 participants) from all  
33 across China. On the other hand, because of funding and logistics, data had to be collected  
34 using a self-filled survey, which could introduce bias compared to a formal epidemiological  
35 study. In addition, the survey was filled only by the cardiologists willing to do so. Some  
36 physicians could be tempted to provide data that are better than the reality. Nevertheless,  
37 the prevalence of hypertension (based on the composite variable made of blood pressure  
38 and antihypertensive drugs, not on a formal inquiry about a diagnosis of hypertension) was  
39 similar to that of the general population of China, suggesting data validity. Of course, the  
40 medical system in China and the formation required to work in cardiology are different  
41 from that of other countries [6 38], limiting the generalizability of the data. The  
42 geographical distribution of the cardiologists across China was not taken into account.  
43  
44  
45  
46  
47  
48  
49  
50  
51  
52  
53  
54  
55  
56  
57  
58  
59  
60

1  
2  
3  
4 Importantly, the survey was not an epidemiological questionnaire and it was only used for  
5 data collection, not assessment; validity and reliability were not verified. Finally, the  
6 characteristics of the cardiologists who were unwilling to fill the survey were not collected.  
7  
8  
9 Additional studies are necessary to confirm those findings.  
10  
11

12  
13 In conclusion, the results suggest that Chinese cardiologists do not recognize and pay  
14 attention to their own blood pressure. Their rate of antihypertensive treatment was low. The  
15 identified risk factors could be used to identify cardiologists at higher risk for hypertension  
16 and for implementing preventive interventions. Our results have a number of implications  
17 for the reform of health care awareness and prevention in cardiologists in China.  
18  
19  
20  
21  
22  
23  
24  
25  
26

## 27 **APPENDIX 1**

28  
29 The China Cardiologist Heart Study Questionnaire  
30  
31  
32  
33

## 34 **DATA SHARING STATEMENT**

35  
36 No additional data are available.  
37  
38  
39  
40

## 41 **ACKNOWLEDGMENTS**

42  
43 The authors acknowledge the contribution of all physicians who participated in this survey.  
44  
45 The study was started by the Chinese Cardiovascular Association and supported by the  
46 GUSU group.  
47  
48  
49  
50  
51

## 52 **FUNDING**

53  
54  
55 The study is supported by the Emerging Frontier Project of Shanghai Hospital  
56  
57  
58  
59  
60

1  
2  
3  
4 Development Center (No. SHDC12014101), the Innovative Research Group Project of  
5  
6 National Natural Science Foundation of China (No. 81521001), and National Key Research  
7  
8 and Development Project (No. 2016YFC1301200). The authors declare that they have no  
9  
10 conflicts of interest.  
11  
12

### 13 14 15 16 **CONFLICTS OF INTEREST**

17  
18 The authors declare that they have no conflicts of interest.  
19  
20

### 21 22 23 **AUTHORS' CONTRIBUTIONS**

24  
25 Lei Hou, Xuejuan Jin conceived and coordinated the study, designed, performed and  
26  
27 analyzed the experiments, wrote the paper. Jianying Ma, Juying Qian, Yong Huo carried  
28  
29 out the data collection, data analysis, and revised the paper. Junbo Ge designed the study,  
30  
31 carried out the data analysis, and revised the paper. All authors reviewed the results and  
32  
33 approved the final version of the manuscript.  
34  
35  
36  
37  
38  
39  
40  
41  
42  
43  
44  
45  
46  
47  
48  
49  
50  
51  
52  
53  
54  
55  
56  
57  
58  
59  
60

**REFERENCES**

1. Goldstein JA, Balter S, Cowley M, et al. Occupational hazards of interventional cardiologists: prevalence of orthopedic health problems in contemporary practice. *Catheterization and cardiovascular interventions : official journal of the Society for Cardiac Angiography & Interventions* 2004;**63**(4):407-11 doi: 10.1002/ccd.20201[published Online First: Epub Date]].
2. Dehmer GJ. Occupational hazards for interventional cardiologists. *Catheterization and cardiovascular interventions : official journal of the Society for Cardiac Angiography & Interventions* 2006;**68**(6):974-6 doi: 10.1002/ccd.21004[published Online First: Epub Date]].
3. Clark DA. How much is too much? *Catheterization and cardiovascular interventions : official journal of the Society for Cardiac Angiography & Interventions* 2000;**51**(3):265
4. Faggiano P, Temporelli PL, Zito G, et al. [Cardiovascular risk profile and lifestyle habits in a cohort of Italian cardiologists. Results of the SOCRATES survey]. *Monaldi archives for chest disease = Archivio Monaldi per le malattie del torace* 2013;**80**(3):118-25 doi: 10.4081/monaldi.2013.73[published Online First: Epub Date]].
5. Michel JB, Sangha DM, Erwin JP, 3rd. Burnout Among Cardiologists. *The American journal of cardiology* 2017;**119**(6):938-40 doi: 10.1016/j.amjcard.2016.11.052[published Online First: Epub Date]].
6. Gong YJ, Huo Y. A Survey of National Cardiology Workforce in China. *Eur Heart J* 2016;**18**(Suppl):A1-A5

- 1  
2  
3  
4 7. Narang A, Sinha SS, Rajagopalan B, et al. The Supply and Demand of the  
5  
6 Cardiovascular Workforce: Striking the Right Balance. *Journal of the American*  
7  
8 *College of Cardiology* 2016;**68**(15):1680-89 doi:  
9  
10 10.1016/j.jacc.2016.06.070[published Online First: Epub Date]].  
11  
12
- 13  
14 8. Temporelli PL, Zito G, Faggiano P, et al. Cardiovascular risk profile and lifestyle habits  
15  
16 in a cohort of Italian cardiologists (from the SOCRATES Survey). *The American*  
17  
18 *journal of cardiology* 2013;**112**(2):226-30 doi:  
19  
20 10.1016/j.amjcard.2013.03.020[published Online First: Epub Date]].  
21  
22
- 23 9. Merz CN, Mensah GA, Fuster V, et al. Task force #5--the role of cardiovascular  
24  
25 specialists as leaders in prevention: from training to champion. 33rd Bethesda  
26  
27 Conference. *Journal of the American College of Cardiology* 2002;**40**(4):641-51  
28  
29
- 30 10. O'Kelly S, Andersen K, Capewell S, et al. Bringing prevention to the population: an  
31  
32 important role for cardiologists in policy-making. *Eur Heart J* 2011;**32**(16):1964-7  
33  
34 doi: 10.1093/eurheartj/ehr128[published Online First: Epub Date]].  
35  
36
- 37 11. Aboyans V, Pinet P, Lacroix P, et al. Knowledge and management of smoking-  
38  
39 cessation strategies among cardiologists in France: a nationwide survey. *Archives of*  
40  
41 *cardiovascular diseases* 2009;**102**(3):193-9 doi:  
42  
43 10.1016/j.acvd.2009.01.005[published Online First: Epub Date]].  
44  
45
- 46 12. Reiner Z, Sonicki Z, Tedeschi-Reiner E. Physicians' perception, knowledge and  
47  
48 awareness of cardiovascular risk factors and adherence to prevention guidelines: the  
49  
50 PERCRO-DOC survey. *Atherosclerosis* 2010;**213**(2):598-603 doi:  
51  
52 10.1016/j.atherosclerosis.2010.09.014[published Online First: Epub Date]].  
53  
54
- 55 13. Lu Y, Hu XM, Huang XL, et al. The relationship between job satisfaction, work stress,  
56  
57

- 1  
2  
3  
4 work-family conflict, and turnover intention among physicians in Guangdong,  
5  
6 China: a cross-sectional study. *BMJ open* 2017;**7**(5):e014894 doi:  
7  
8 10.1136/bmjopen-2016-014894[published Online First: Epub Date].  
9  
10
- 11 14. Liang Y, Wang H, Tao X. Quality of life of young clinical doctors in public hospitals in  
12  
13 China's developed cities as measured by the Nottingham Health Profile (NHP).  
14  
15 *International journal for equity in health* 2015;**14**:85 doi: 10.1186/s12939-015-  
16  
17 0199-2[published Online First: Epub Date].  
18  
19
- 20 15. Steering Committee of the Physicians' Health Study Research G. Final report on the  
21  
22 aspirin component of the ongoing Physicians' Health Study. *The New England*  
23  
24 *journal of medicine* 1989;**321**(3):129-35 doi:  
25  
26 10.1056/NEJM198907203210301[published Online First: Epub Date].  
27  
28
- 29 16. Hu DY, Yu JM, Chen F, et al. The Chinese physicians' Cardiovascular Risk Evaluation  
30  
31 (CARE) survey: an assessment of physicians' own cardiovascular risks. *Heart Asia*  
32  
33 2010;**2**(1):89-94 doi: 10.1136/ha.2009.001214[published Online First: Epub Date].  
34  
35
- 36 17. He J, Gu D, Chen J, et al. Premature deaths attributable to blood pressure in China: a  
37  
38 prospective cohort study. *Lancet* 2009;**374**(9703):1765-72 doi: 10.1016/S0140-  
39  
40 6736(09)61199-5[published Online First: Epub Date].  
41  
42
- 43 18. Miura K, Daviglius ML, Dyer AR, et al. Relationship of blood pressure to 25-year  
44  
45 mortality due to coronary heart disease, cardiovascular diseases, and all causes in  
46  
47 young adult men: the Chicago Heart Association Detection Project in Industry.  
48  
49 *Archives of internal medicine* 2001;**161**(12):1501-8  
50  
51
- 52 19. Franco OH, Peeters A, Bonneux L, et al. Blood pressure in adulthood and life  
53  
54 expectancy with cardiovascular disease in men and women: life course analysis.  
55  
56  
57  
58  
59  
60

- 1  
2  
3  
4 Hypertension 2005;**46**(2):280-6 doi:  
5  
6 10.1161/01.HYP.0000173433.67426.9b[published Online First: Epub Date]].  
7  
8  
9 20. Whelton PK, Carey RM, Aronow WS, et al. 2017  
10 ACC/AHA/AAPA/ABC/ACPM/AGS/APhA/ASH/ASPC/NMA/PCNA Guideline  
11 for the Prevention, Detection, Evaluation, and Management of High Blood Pressure  
12 in Adults: A Report of the American College of Cardiology/American Heart  
13 Association Task Force on Clinical Practice Guidelines. Journal of the American  
14 College of Cardiology 2018;**71**(19):e127-e248 doi:  
15  
16 10.1016/j.jacc.2017.11.006[published Online First: Epub Date]].  
17  
18  
19  
20  
21  
22  
23  
24  
25 21. Spruill TM. Chronic psychosocial stress and hypertension. Current hypertension reports  
26 2010;**12**(1):10-6 doi: 10.1007/s11906-009-0084-8[published Online First: Epub  
27 Date]].  
28  
29  
30  
31  
32 22. Vrijkotte TG, van Doornen LJ, de Geus EJ. Effects of work stress on ambulatory blood  
33 pressure, heart rate, and heart rate variability. Hypertension 2000;**35**(4):880-6  
34  
35  
36  
37 23. Trudel X, Brisson C, Milot A, et al. Adverse psychosocial work factors, blood pressure  
38 and hypertension incidence: repeated exposure in a 5-year prospective cohort study.  
39 Journal of epidemiology and community health 2016;**70**(4):402-8 doi:  
40 10.1136/jech-2014-204914[published Online First: Epub Date]].  
41  
42  
43  
44  
45  
46 24. Calhoun DA, Harding SM. Sleep and hypertension. Chest 2010;**138**(2):434-43 doi:  
47 10.1378/chest.09-2954[published Online First: Epub Date]].  
48  
49  
50  
51 25. Wang Y, Mei H, Jiang YR, et al. Relationship between Duration of Sleep and  
52 Hypertension in Adults: A Meta-Analysis. Journal of clinical sleep medicine :  
53 JCSM : official publication of the American Academy of Sleep Medicine  
54  
55  
56  
57  
58  
59  
60



- 2015;**11**(9):1047-56 doi: 10.5664/jcsm.5024[published Online First: Epub Date]].
26. Wu J, Cheng X, Qiu L, et al. Prevalence and Clustering of Major Cardiovascular Risk Factors in China: A Recent Cross-Sectional Survey. *Medicine* 2016;**95**(10):e2712 doi: 10.1097/MD.0000000000002712[published Online First: Epub Date]].
27. Lu Y, Wang P, Zhou T, et al. Comparison of Prevalence, Awareness, Treatment, and Control of Cardiovascular Risk Factors in China and the United States. *Journal of the American Heart Association* 2018;**7**(3) doi: 10.1161/JAHA.117.007462[published Online First: Epub Date]].
28. Yang F, Qian D, Hu DY, et al. Prevalence of cardiovascular disease risk factor clustering in Chinese adults. *Clin Trials Regul Sci Cardiol* 2016
29. Sui H, Chen WW, Wang W. Interpretation of Report on Cardiovascular Diseases in China 2015. *Chin J Cardiovasc Med* 2016;**21**(4):259-61
30. Huang XB, Chen F, Dai W, et al. Prevalence and risk factors associated with hypertension in the Chinese Qiang population. *Clinical and experimental hypertension* 2018;**40**(5):427-33 doi: 10.1080/10641963.2017.1392553[published Online First: Epub Date]].
31. Hu Y, Wang Z, Wang Y, et al. Prevalence, Awareness, Treatment, and Control of Hypertension among Kazakhs with high Salt Intake in Xinjiang, China: A Community-based Cross-sectional Study. *Scientific reports* 2017;**7**:45547 doi: 10.1038/srep45547[published Online First: Epub Date]].
32. Abuissa H, Lavie C, Spertus J, et al. Personal health habits of American cardiologists. *The American journal of cardiology* 2006;**97**(7):1093-6 doi: 10.1016/j.amjcard.2005.10.057[published Online First: Epub Date]].

- 1  
2  
3  
4 33. Lloyd-Jones DM, Evans JC, Levy D. Hypertension in adults across the age spectrum:  
5 current outcomes and control in the community. *Jama* 2005;**294**(4):466-72 doi:  
6 10.1001/jama.294.4.466[published Online First: Epub Date]].  
7  
8  
9  
10  
11 34. James PA, Oparil S, Carter BL, et al. 2014 evidence-based guideline for the  
12 management of high blood pressure in adults: report from the panel members  
13 appointed to the Eighth Joint National Committee (JNC 8). *Jama* 2014;**311**(5):507-  
14 20 doi: 10.1001/jama.2013.284427[published Online First: Epub Date]].  
15  
16  
17  
18  
19  
20  
21 35. Leung AA, Daskalopoulou SS, Dasgupta K, et al. Hypertension Canada's 2017  
22 Guidelines for Diagnosis, Risk Assessment, Prevention, and Treatment of  
23 Hypertension in Adults. *The Canadian journal of cardiology* 2017;**33**(5):557-76 doi:  
24 10.1016/j.cjca.2017.03.005[published Online First: Epub Date]].  
25  
26  
27  
28  
29  
30 36. Stockwell DH, Madhavan S, Cohen H, et al. The determinants of hypertension  
31 awareness, treatment, and control in an insured population. *American journal of*  
32 *public health* 1994;**84**(11):1768-74  
33  
34  
35  
36  
37 37. Berhe DF, Taxis K, Haaijer-Ruskamp FM, et al. Hypertension treatment practices and  
38 its determinants among ambulatory patients: retrospective cohort study in Ethiopia.  
39 *BMJ open* 2017;**7**(8):e015743 doi: 10.1136/bmjopen-2016-015743[published  
40 Online First: Epub Date]].  
41  
42  
43  
44  
45  
46 38. Levinson W, King TE, Jr., Goldman L, et al. Clinical decisions. American Board of  
47 Internal Medicine maintenance of certification program. *The New England journal*  
48 *of medicine* 2010;**362**(10):948-52 doi: 10.1056/NEJMclde0911205[published  
49 Online First: Epub Date]].  
50  
51  
52  
53  
54  
55 39. Song P, Jin C, Tang W. New medical education reform in China: Towards healthy  
56  
57  
58  
59  
60

- 1  
2  
3  
4 China 2030. Bioscience trends 2017;**11**(4):366-69 doi:  
5  
6 10.5582/bst.2017.01198[published Online First: Epub Date]].  
7  
8  
9 40. The L. Medical education reform in China. Lancet 2017;**390**(10092):334 doi:  
10  
11 10.1016/S0140-6736(17)31921-9[published Online First: Epub Date]].  
12  
13 41. Chen X, Tan X, Li L. Health Problem and Occupational Stress among Chinese Doctors.  
14  
15 Chin Med 2013;**2013**(4):1-6  
16  
17 42. Staiger DO, Auerbach DI, Buerhaus PI. Trends in the work hours of physicians in the  
18  
19 United States. Jama 2010;**303**(8):747-53 doi: 10.1001/jama.2010.168[published  
20  
21 Online First: Epub Date]].  
22  
23 43. Conway SH, Pompeii LA, Roberts RE, et al. Dose-Response Relation Between Work  
24  
25 Hours and Cardiovascular Disease Risk: Findings From the Panel Study of Income  
26  
27 Dynamics. Journal of occupational and environmental medicine 2016;**58**(3):221-6  
28  
29 doi: 10.1097/JOM.0000000000000654[published Online First: Epub Date]].  
30  
31  
32 44. Wu Y, Huxley R, Li L, et al. Prevalence, awareness, treatment, and control of  
33  
34 hypertension in China: data from the China National Nutrition and Health Survey  
35  
36 2002. Circulation 2008;**118**(25):2679-86 doi:  
37  
38 10.1161/CIRCULATIONAHA.108.788166[published Online First: Epub Date]].  
39  
40  
41 45. Wang J, Zhang L, Wang F, et al. Prevalence, awareness, treatment, and control of  
42  
43 hypertension in China: results from a national survey. American journal of  
44  
45 hypertension 2014;**27**(11):1355-61 doi: 10.1093/ajh/hpu053[published Online First:  
46  
47 Epub Date]].  
48  
49  
50  
51  
52  
53  
54  
55  
56  
57  
58  
59  
60

**Table 1.** Demographic characteristics, current disease and medication of the participants

| Variable        | Total (n=28,924) |
|-----------------|------------------|
| Age (years)     | 37.82±9.27       |
| 20-29           | 5308 (18.35)     |
| 30-39           | 12,338 (42.66)   |
| 40-49           | 8019 (27.72)     |
| 50-59           | 2674 (9.24)      |
| 60-69           | 584 (2.02)       |
| ≥70             | 1 (0.00)         |
| Gender          |                  |
| Male            | 15,749 (54.45)   |
| Female          | 13,175 (45.55)   |
| Academic degree |                  |
| Junior college  | 225 (0.78)       |
| Bachelor        | 12,704 (43.92)   |
| Master          | 10,580 (36.58)   |
| Doctor          | 2905 (10.04)     |
| Post-doctor     | 412 (1.42)       |
| Others          | 2098 (7.25)      |
| Hospital level  |                  |
| Primary         | 381 (1.32)       |
| Secondary       | 10,823 (37.42)   |

|    |                                  |                |
|----|----------------------------------|----------------|
| 1  |                                  |                |
| 2  |                                  |                |
| 3  |                                  |                |
| 4  | Tertiary                         | 17,375 (60.07) |
| 5  |                                  |                |
| 6  | Others                           | 345 (1.19)     |
| 7  |                                  |                |
| 8  |                                  |                |
| 9  | Professional title               |                |
| 10 |                                  |                |
| 11 | General physician                | 4230 (14.62)   |
| 12 |                                  |                |
| 13 | Healer                           | 540 (1.87)     |
| 14 |                                  |                |
| 15 | Resident physician               | 966 (3.34)     |
| 16 |                                  |                |
| 17 | Attending physician              | 13,448 (46.49) |
| 18 |                                  |                |
| 19 | Associate chief physician        | 4674 (16.16)   |
| 20 |                                  |                |
| 21 | Chief physician                  | 2279 (7.88)    |
| 22 |                                  |                |
| 23 | Others                           | 2787 (9.64)    |
| 24 |                                  |                |
| 25 |                                  |                |
| 26 |                                  |                |
| 27 | BMI (kg/m <sup>2</sup> )         | 22.35±2.51     |
| 28 |                                  |                |
| 29 | <18.5                            | 1475 (5.10)    |
| 30 |                                  |                |
| 31 | 18.5-23.9                        | 19,304 (66.74) |
| 32 |                                  |                |
| 33 | ≥24                              | 8145 (28.16)   |
| 34 |                                  |                |
| 35 |                                  |                |
| 36 | Current disease                  |                |
| 37 |                                  |                |
| 38 | Coronary heart disease           | 1760 (6.08)    |
| 39 |                                  |                |
| 40 | Heart failure                    | 554 (1.92)     |
| 41 |                                  |                |
| 42 | Diabetes                         | 598 (2.07)     |
| 43 |                                  |                |
| 44 | Stroke/transient ischemic attack | 167 (0.58)     |
| 45 |                                  |                |
| 46 | Chronic kidney disease           | 409 (1.41)     |
| 47 |                                  |                |
| 48 | Peripheral vascular disease      | 431 (1.49)     |
| 49 |                                  |                |
| 50 | Hypertension                     | 7319 (25.30)   |
| 51 |                                  |                |
| 52 |                                  |                |
| 53 |                                  |                |
| 54 |                                  |                |
| 55 |                                  |                |
| 56 |                                  |                |
| 57 |                                  |                |
| 58 |                                  |                |
| 59 |                                  |                |
| 60 |                                  |                |

## Medication

|                        |             |
|------------------------|-------------|
| Antihypertensive drugs | 2323 (8.03) |
| Antidiabetic drugs     | 574 (1.98)  |
| Lipid-lowering drugs   | 1223 (4.23) |

---

Data are expressed as mean±standard deviation or n (%). BMI, body mass index.

For peer review only

**Table 2.** Clinical characteristics of the participants

| Variable                       | Total (n=28,924) |
|--------------------------------|------------------|
| SBP/DBP (mmHg)                 |                  |
| SBP                            | 122.74±14.27     |
| DBP                            | 81.2±12.04       |
| <130/<80                       | 8802 (30.43)     |
| Taking antihypertensive drugs  | 228 (2.59)       |
| 130-139/80-89                  | 13,763 (47.58)   |
| Taking antihypertensive drugs  | 732 (5.32)       |
| ≥140/≥90                       | 6359 (21.99)     |
| Taking antihypertensive drugs  | 2323 (36.53)     |
| Heart rate (bpm)               | 74.11±9.26       |
| <50                            | 1 (0.00)         |
| 50-59                          | 778 (2.69)       |
| 60-69                          | 6972 (24.1)      |
| 70-79                          | 13,033 (45.06)   |
| 80-89                          | 6600 (22.82)     |
| ≥90                            | 1540 (5.32)      |
| Fasting blood glucose (mmol/L) | 5.1±1.65         |
| <6.1                           | 26,030 (89.99)   |
| 6.1-6.9                        | 1810 (6.26)      |
| ≥7.0                           | 1084 (3.75)      |

|                |                |
|----------------|----------------|
| LDL-C (mmol/L) | 2.73±0.87      |
| <2.6           | 12,888 (44.56) |
| 2.6-3.3        | 12,058 (41.69) |
| 3.4-4.0        | 2363 (8.17)    |
| ≥4.1           | 1614 (5.58)    |
| Unknown        | 1 (0.00)       |
| HDL-C (mmol/L) | 1.85±1.02      |
| <1.0           | 1879 (6.50)    |
| ≥1.0           | 27,043 (93.50) |
| Unknown        | 2 (0.01)       |
| TC (mmol/L)    | 4.09±1.23      |
| <5.2           | 24,972 (86.34) |
| 5.2-6.1        | 2988 (10.33)   |
| ≥6.2           | 957 (3.31)     |
| Unknown        | 7 (0.02)       |
| TG (mmol/L)    | 1.6 (1.2,2.2)  |
| <1.7           | 15,547 (53.75) |
| 1.7-2.2        | 6345 (21.94)   |
| ≥2.3           | 7029 (24.30)   |
| Unknown        | 3 (0.01)       |
| Smoking        |                |
| Frequent       | 4660 (16.11)   |



|    |                |                |
|----|----------------|----------------|
| 1  |                |                |
| 2  |                |                |
| 3  |                |                |
| 4  | Infrequent     | 13,561 (46.88) |
| 5  |                |                |
| 6  | Never          | 10,703 (37.00) |
| 7  |                |                |
| 8  |                |                |
| 9  | Family history |                |
| 10 |                |                |
| 11 | Yes            | 22,611 (78.17) |
| 12 |                |                |
| 13 | No             | 6313 (21.83)   |
| 14 |                |                |
| 15 |                |                |

16 Data are expressed as mean±standard deviation or n (%). DBP, diastolic blood pressure;  
17  
18 HDL-C, high density lipoprotein-cholesterol; LDL-C, low density lipoprotein-cholesterol;  
19  
20 SBP, systolic blood pressure; TC, total cholesterol; TG, triglyceride.  
21  
22  
23  
24  
25  
26  
27  
28  
29  
30  
31  
32  
33  
34  
35  
36  
37  
38  
39  
40  
41  
42  
43  
44  
45  
46  
47  
48  
49  
50  
51  
52  
53  
54  
55  
56  
57  
58  
59  
60

**Table 3.** Prevalence of hypertension, rate of antihypertensive drugs taking, and rate of reaching the target blood pressure in cardiologists with different gender

| Variable                           | Total<br>(n=28,924) | Male<br>(n=15,749) | Female<br>(n=13,175) | P      |
|------------------------------------|---------------------|--------------------|----------------------|--------|
| Hypertension                       | 7319 (25.30)        | 4574 (29.00)       | 2745 (20.83)         | <0.001 |
| Taking antihypertensive drugs      | 2323 (31.74)        | 1533 (33.52)       | 790 (28.78)          | <0.001 |
| Reaching the target blood pressure | 960 (41.33)         | 610 (39.79)        | 350 (44.30)          | 0.036  |

Data are expressed as n (%).

**Table 4.** Prevalence of hypertension, rate of antihypertensive drugs taking, and rate of reaching the target blood pressure in cardiologists with different age

| Variable                           | Total        | 20-29        | 30-39        | 40-49        | 50-59       | 60-69       | ≥70     | P      |
|------------------------------------|--------------|--------------|--------------|--------------|-------------|-------------|---------|--------|
|                                    | (n=28924)    | (n=5308)     | (n=12,338)   | (n=8019)     | (n=2674)    | (n=584)     | (n=1)   |        |
| Hypertension                       | 7319 (25.3)  | 1276 (24.04) | 2680 (21.72) | 2158 (26.91) | 946 (35.38) | 258 (44.18) | 1 (100) | <0.001 |
| Taking antihypertensive drugs      | 2323 (31.74) | 256 (20.06)  | 738 (27.54)  | 806 (37.35)  | 397 (41.97) | 126 (48.84) | 0       | <0.001 |
| Reaching the target blood pressure | 960 (41.33)  | 124 (48.44)  | 322 (43.63)  | 336 (41.69)  | 130 (32.75) | 48 (38.10)  | -       | 0.001  |

Data are expressed as n (%).

**Table 5.** Prevalence of hypertension, rate of antihypertensive drugs taking, and rate of reaching the target blood pressure in cardiologists with different hospital level

| Variable                           | Total<br>(n=28,924) | Primary<br>(n=381) | Secondary<br>(n=10,823) | Tertiary<br>(n=17,375) | Others<br>(n=345) | P      |
|------------------------------------|---------------------|--------------------|-------------------------|------------------------|-------------------|--------|
| Hypertension                       | 7319 (25.30)        | 136 (35.70)        | 2695 (24.90)            | 4413 (25.40)           | 75 (21.74)        | <0.001 |
| Taking antihypertensive drugs      | 2323 (31.74)        | 38 (27.94)         | 904 (33.43)             | 1354 (30.68)           | 27 (36.00)        | 0.049  |
| Reaching the target blood pressure | 960 (41.33)         | 8 (21.05)          | 390 (43.14)             | 551 (40.69)            | 11 (40.74)        | 0.048  |

Data are expressed as n (%).

**Table S1.** Area of expertise of the participants

| Variable                                   | Total (n=28,924) |
|--------------------------------------------|------------------|
| Atherosclerosis and coronary heart disease | 14,783 (51.11)   |
| Hypertension                               | 18,477 (63.88)   |
| Arrhythmia and electrophysiology           | 8226 (28.44)     |
| Blood lipid metabolism                     | 10,147 (35.08)   |
| Congenital heart disease                   | 4678 (16.17)     |
| Heart failure                              | 9087 (31.42)     |
| Pulmonary vascular disease                 | 2859 (9.88)      |
| Cardiac intensive care and monitoring      | 2051 (7.09)      |
| Interventional cardiology                  | 2526 (8.73)      |
| Cardiovascular imaging                     | 2742 (9.48)      |
| Senile cardiovascular disease              | 0                |
| Female cardiovascular disease              | 2859 (9.88)      |
| Structural heart disease                   | 3774 (13.05)     |
| Basic-clinical combination                 | 2350 (8.12)      |
| Others                                     | 2746 (9.49)      |

Data are expressed as n (%).

**Table S2.** Prevalence of hypertension, rate of antihypertensive drugs taking, and rate of reaching the target blood pressure in male cardiologists with different age

| Variable                           | 20-29      | 30-39       | 40-49       | 50-59      | 60-69      | ≥70     | P      |
|------------------------------------|------------|-------------|-------------|------------|------------|---------|--------|
|                                    | (n=2437)   | (n=6777)    | (n=4521)    | (n=1656)   | (n=357)    | (n=1)   |        |
| Hypertension                       | 684 (28.1) | 1709 (25.2) | 1362 (30.1) | 647 (39.1) | 171 (47.9) | 1 (100) | <0.001 |
| Taking antihypertensive drugs      | 159 (23.2) | 510 (29.8)  | 506 (37.2)  | 272 (42)   | 86 (50.3)  | 0       | <0.001 |
| Reaching the target blood pressure | 124 (48.4) | 322 (43.6)  | 336 (41.7)  | 130 (32.7) | 48 (38.1)  | -       | 0.001  |

Data are expressed as n (%).

**Table S3.** Prevalence of hypertension, rate of antihypertensive drugs taking, and rate of reaching the target blood pressure in female cardiologists with different age

| Variable                           | 20-29      | 30-39      | 40-49      | 50-59      | 60-69     | P      |
|------------------------------------|------------|------------|------------|------------|-----------|--------|
|                                    | (n=2871)   | (n=5561)   | (n=3498)   | (n=1018)   | (n=227)   |        |
| Hypertension                       | 592 (20.6) | 971 (17.5) | 796 (22.8) | 299 (29.4) | 87 (38.3) | <0.001 |
| Taking antihypertensive drugs      | 97 (16.4)  | 228 (23.5) | 300 (37.7) | 125 (41.8) | 40 (46.0) | <0.001 |
| Reaching the target blood pressure | 51 (52.6)  | 107 (46.9) | 132 (44)   | 45 (36)    | 15 (37.5) | 0.108  |

Data are expressed as n (%).

**Table S4.** Prevalence of hypertension, rate of antihypertensive drugs taking, and rate of reaching the target blood pressure in male cardiologists with different hospital level

| Variable                           | Primary<br>(n=211) | Secondary<br>(n=5807) | Tertiary<br>(n=9552) | Others<br>(n=179) | P      |
|------------------------------------|--------------------|-----------------------|----------------------|-------------------|--------|
| Hypertension                       | 92 (43.6)          | 1674 (28.8)           | 2765 (28.9)          | 43 (24.0)         | <0.001 |
| Taking antihypertensive drugs      | 28 (30.4)          | 581 (34.7)            | 912 (33)             | 12 (27.9)         | 0.491  |
| Reaching the target blood pressure | 5 (17.9)           | 229 (39.4)            | 374 (41)             | 2 (16.7)          | 0.031  |

Data are expressed as n (%).



1  
2  
3  
4  
5  
6  
7  
8  
9  
10  
11  
12  
13  
14  
15  
16  
17  
18  
19  
20  
21  
22  
23  
24  
25  
26  
27  
28  
29  
30  
31  
32  
33  
34  
35  
36  
37  
38  
39  
40  
41  
42  
43  
44  
45  
46

**Table S5.** Prevalence of hypertension, rate of antihypertensive drugs taking, and rate of reaching the target blood pressure in female cardiologists with different hospital level

| Variable                           | Primary<br>(n=170) | Secondary<br>(n=5016) | Tertiary<br>(n=7823) | Others<br>(n=166) | P     |
|------------------------------------|--------------------|-----------------------|----------------------|-------------------|-------|
| Hypertension                       | 44 (25.9)          | 1021 (20.4)           | 1648 (21.1)          | 32 (19.3)         | 0.281 |
| Taking antihypertensive drugs      | 10 (22.7)          | 323 (31.6)            | 442 (26.8)           | 15 (46.9)         | 0.005 |
| Reaching the target blood pressure | 3 (30.0)           | 161 (49.8)            | 177 (40)             | 9 (60.0)          | 0.022 |

Data are expressed as n (%).

**Table S6.** Prevalence of hypertension, rate of antihypertensive drugs taking, and rate of reaching the target blood pressure in cardiologists with different professional title

| Variable                           | Total        | General               | Healer      | Resident             | Attending               | Associate chief       | Chief                 | Others      | P      |
|------------------------------------|--------------|-----------------------|-------------|----------------------|-------------------------|-----------------------|-----------------------|-------------|--------|
|                                    | (n=28,924)   | physician<br>(n=4230) | (n=540)     | physician<br>(n=966) | physician<br>(n=13,448) | physician<br>(n=4674) | physician<br>(n=2279) | (n=2787)    |        |
| Hypertension                       | 7319 (25.30) | 896 (21.18)           | 139 (25.74) | 263 (27.23)          | 3032 (22.55)            | 1413 (30.23)          | 806 (35.37)           | 770 (27.63) | <0.001 |
| Taking antihypertensive drugs      | 2323 (31.74) | 179 (19.98)           | 46 (33.09)  | 88 (33.46)           | 934 (30.80)             | 546 (38.64)           | 357 (44.29)           | 173 (22.47) | <0.001 |
| Reaching the target blood pressure | 960 (41.33)  | 70 (39.11)            | 21 (45.65)  | 49 (55.68)           | 404 (43.25)             | 192 (35.16)           | 135 (37.82)           | 89 (51.45)  | <0.001 |

Data are expressed as n (%).

**Table S7.** Prevalence of hypertension, rate of antihypertensive drugs taking, and rate of reaching the target blood pressure in male cardiologists with different professional title

| Variable                           | General physician<br>(n=2049) | Healer<br>(n=260) | Resident physician<br>(n=548) | Attending physician<br>(n=7447) | Associate physician<br>(n=2740) | chief physician<br>(n=1447) | Chief physician<br>(n=1258) | Others<br>(n=1258) | P |
|------------------------------------|-------------------------------|-------------------|-------------------------------|---------------------------------|---------------------------------|-----------------------------|-----------------------------|--------------------|---|
| Hypertension                       | 507 (24.7)                    | 82 (31.5)         | 159 (29)                      | 1944 (26.1)                     | 896 (32.7)                      | 579 (40.0)                  | 407 (32.4)                  | <0.001             |   |
| Taking antihypertensive drugs      | 120 (23.7)                    | 33 (40.2)         | 63 (39.6)                     | 620 (31.9)                      | 335 (37.4)                      | 264 (45.6)                  | 98 (24.1)                   | <0.001             |   |
| Reaching the target blood pressure | 43 (35.8)                     | 11 (33.3)         | 32 (50.8)                     | 259 (41.8)                      | 117 (34.9)                      | 96 (36.4)                   | 52 (53.1)                   | 0.008              |   |

Data are expressed as n (%).

**Table S8.** Prevalence of hypertension, rate of antihypertensive drugs taking, and rate of reaching the target blood pressure in female cardiologists with different professional title

| Variable                              | General<br>physician<br>(n=2181) | Healer<br>(n=280) | Resident<br>physician<br>(n=418) | Attending<br>physician<br>(n=6001) | Associate chief<br>physician<br>(n=1934) | Chief<br>physician<br>(n=832) | Others<br>(n=1529) | P      |
|---------------------------------------|----------------------------------|-------------------|----------------------------------|------------------------------------|------------------------------------------|-------------------------------|--------------------|--------|
| Hypertension                          | 389 (17.8)                       | 57 (20.4)         | 104 (24.9)                       | 1088 (18.1)                        | 517 (26.7)                               | 227 (27.3)                    | 363 (23.7)         | <0.001 |
| Taking antihypertensive drugs         | 59 (15.2)                        | 13 (22.8)         | 25 (24.0)                        | 314 (28.9)                         | 211 (40.8)                               | 93 (41.0)                     | 75 (20.7)          | <0.001 |
| Reaching the target blood<br>pressure | 27 (45.8)                        | 10 (76.9)         | 17 (68.0)                        | 145 (46.2)                         | 75 (35.5)                                | 39 (41.9)                     | 37 (49.3)          | 0.004  |

Data are expressed as n (%).

**Table S9.** Univariable and multivariable logistic regressions for hypertension among cardiologists

| Variable        | Univariable logistic regression |        | Multivariable logistic regression |        |
|-----------------|---------------------------------|--------|-----------------------------------|--------|
|                 | OR (95%CI)                      | P      | OR (95%CI)                        | P      |
| Age (years)     |                                 |        |                                   |        |
| 20-29           | Reference                       |        | Reference                         |        |
| 30-39           | 0.877 (0.813,0.946)             | 0.001  | 0.915 (0.793,1.056)               | 0.227  |
| 40-49           | 1.163 (1.074,1.26)              | <0.001 | 1.012 (0.861,1.189)               | 0.885  |
| 50-59           | 1.73 (1.563,1.914)              | <0.001 | 1.397 (1.164,1.678)               | <0.001 |
| ≥60             | 2.51 (2.108,2.99)               | <0.001 | 1.949 (1.534,2.476)               | <0.001 |
| Gender          |                                 |        |                                   |        |
| Male            | Reference                       |        |                                   |        |
| Female          | 0.643 (0.609,0.679)             | <0.001 | 0.866 (0.813,0.924)               | <0.001 |
| Academic degree |                                 |        |                                   |        |
| Junior college  | Reference                       |        | Reference                         |        |
| Bachelor        | 0.631 (0.476,0.837)             | 0.001  | 0.629 (0.461,0.859)               | 0.004  |

|    |                           |                     |        |                     |        |
|----|---------------------------|---------------------|--------|---------------------|--------|
| 1  |                           |                     |        |                     |        |
| 2  |                           |                     |        |                     |        |
| 3  |                           |                     |        |                     |        |
| 4  |                           |                     |        |                     |        |
| 5  | Master                    | 0.713 (0.538,0.946) | 0.019  | 0.722 (0.528,0.988) | 0.042  |
| 6  |                           |                     |        |                     |        |
| 7  | Doctor                    | 0.86 (0.643,1.149)  | 0.307  | 0.774 (0.56,1.069)  | 0.120  |
| 8  |                           |                     |        |                     |        |
| 9  | Post-doctor               | 1.049 (0.742,1.482) | 0.787  | 0.776 (0.53,1.136)  | 0.191  |
| 10 |                           |                     |        |                     |        |
| 11 | Others                    | 0.844 (0.628,1.133) | 0.258  | 0.771 (0.553,1.074) | 0.124  |
| 12 |                           |                     |        |                     |        |
| 13 |                           |                     |        |                     |        |
| 14 | Hospital level            |                     |        |                     |        |
| 15 |                           |                     |        |                     |        |
| 16 | Primary                   | Reference           |        | Reference           |        |
| 17 |                           |                     |        |                     |        |
| 18 | Secondary                 | 0.597 (0.482,0.74)  | <0.001 | 0.582 (0.464,0.728) | <0.001 |
| 19 |                           |                     |        |                     |        |
| 20 | Tertiary                  | 0.613 (0.496,0.758) | <0.001 | 0.579 (0.463,0.724) | <0.001 |
| 21 |                           |                     |        |                     |        |
| 22 | Others                    | 0.5 (0.359,0.696)   | <0.001 | 0.508 (0.359,0.717) | <0.001 |
| 23 |                           |                     |        |                     |        |
| 24 |                           |                     |        |                     |        |
| 25 | Professional title        |                     |        |                     |        |
| 26 |                           |                     |        |                     |        |
| 27 | General physician         | Reference           |        | Reference           |        |
| 28 |                           |                     |        |                     |        |
| 29 | Healer                    | 1.29 (1.049,1.586)  | 0.016  | 1.01 (0.791,1.291)  | 0.934  |
| 30 |                           |                     |        |                     |        |
| 31 | Resident physician        | 1.392 (1.187,1.633) | <0.001 | 1.064 (0.871,1.301) | 0.542  |
| 32 |                           |                     |        |                     |        |
| 33 | Attending physician       | 1.083 (0.996,1.178) | 0.063  | 0.965 (0.841,1.107) | 0.611  |
| 34 |                           |                     |        |                     |        |
| 35 | Associate chief physician | 1.612 (1.464,1.776) | <0.001 | 1.118 (0.948,1.317) | 0.185  |
| 36 |                           |                     |        |                     |        |
| 37 |                           |                     |        |                     |        |
| 38 |                           |                     |        |                     |        |
| 39 |                           |                     |        |                     |        |
| 40 |                           |                     |        |                     |        |
| 41 |                           |                     |        |                     |        |
| 42 |                           |                     |        |                     |        |
| 43 |                           |                     |        |                     |        |
| 44 |                           |                     |        |                     |        |
| 45 |                           |                     |        |                     |        |
| 46 |                           |                     |        |                     |        |

|    |                          |                     |        |                     |        |
|----|--------------------------|---------------------|--------|---------------------|--------|
| 1  |                          |                     |        |                     |        |
| 2  |                          |                     |        |                     |        |
| 3  |                          |                     |        |                     |        |
| 4  |                          |                     |        |                     |        |
| 5  | Chief physician          | 2.037 (1.819,2.281) | <0.001 | 1.131 (0.94,1.361)  | 0.192  |
| 6  |                          |                     |        |                     |        |
| 7  | Others                   | 1.42 (1.271,1.587)  | <0.001 | 1.193 (0.99,1.438)  | 0.063  |
| 8  |                          |                     |        |                     |        |
| 9  | BMI (kg/m <sup>2</sup> ) |                     |        |                     |        |
| 10 |                          |                     |        |                     |        |
| 11 | <18.5                    | 0.744 (0.649,0.853) | <0.001 | 0.919 (0.797,1.061) | 0.248  |
| 12 |                          |                     |        |                     |        |
| 13 | 18.5-23.9                | Reference           |        | Reference           |        |
| 14 |                          |                     |        |                     |        |
| 15 | ≥24                      | 1.627 (1.536,1.723) | <0.001 | 1.314 (1.233,1.4)   | <0.001 |
| 16 |                          |                     |        |                     |        |
| 17 |                          |                     |        |                     |        |
| 18 | Smoking                  |                     |        |                     |        |
| 19 |                          |                     |        |                     |        |
| 20 | Frequent                 | Reference           |        | Reference           |        |
| 21 |                          |                     |        |                     |        |
| 22 | Infrequent               | 0.422 (0.394,0.453) | <0.001 | 0.568 (0.525,0.613) | <0.001 |
| 23 |                          |                     |        |                     |        |
| 24 | Never                    | 0.342 (0.318,0.369) | <0.001 | 0.469 (0.431,0.509) | <0.001 |
| 25 |                          |                     |        |                     |        |
| 26 |                          |                     |        |                     |        |
| 27 | Family history           |                     |        |                     |        |
| 28 |                          |                     |        |                     |        |
| 29 | No                       | Reference           |        | Reference           |        |
| 30 |                          |                     |        |                     |        |
| 31 | Yes                      | 1.77 (1.667,1.880)  | <0.001 | 1.261 (1.18,1.348)  | <0.001 |
| 32 |                          |                     |        |                     |        |
| 33 |                          |                     |        |                     |        |
| 34 | Comorbidity              |                     |        |                     |        |
| 35 |                          |                     |        |                     |        |
| 36 | No                       | Reference           |        | Reference           |        |
| 37 |                          |                     |        |                     |        |
| 38 |                          |                     |        |                     |        |
| 39 |                          |                     |        |                     |        |
| 40 |                          |                     |        |                     |        |
| 41 |                          |                     |        |                     |        |
| 42 |                          |                     |        |                     |        |
| 43 |                          |                     |        |                     |        |
| 44 |                          |                     |        |                     |        |
| 45 |                          |                     |        |                     |        |
| 46 |                          |                     |        |                     |        |

|    |       |                     |        |                    |
|----|-------|---------------------|--------|--------------------|
| 1  |       |                     |        |                    |
| 2  |       |                     |        |                    |
| 3  |       |                     |        |                    |
| 4  |       |                     |        |                    |
| 5  | Yes   | 4.003 (3.723,4.304) | <0.001 | 3.158 (2.924,3.41) |
| 6  |       |                     |        | <0.001             |
| 7  | <hr/> |                     |        |                    |
| 8  |       |                     |        |                    |
| 9  |       |                     |        |                    |
| 10 |       |                     |        |                    |
| 11 |       |                     |        |                    |
| 12 |       |                     |        |                    |
| 13 |       |                     |        |                    |
| 14 |       |                     |        |                    |
| 15 |       |                     |        |                    |
| 16 |       |                     |        |                    |
| 17 |       |                     |        |                    |
| 18 |       |                     |        |                    |
| 19 |       |                     |        |                    |
| 20 |       |                     |        |                    |
| 21 |       |                     |        |                    |
| 22 |       |                     |        |                    |
| 23 |       |                     |        |                    |
| 24 |       |                     |        |                    |
| 25 |       |                     |        |                    |
| 26 |       |                     |        |                    |
| 27 |       |                     |        |                    |
| 28 |       |                     |        |                    |
| 29 |       |                     |        |                    |
| 30 |       |                     |        |                    |
| 31 |       |                     |        |                    |
| 32 |       |                     |        |                    |
| 33 |       |                     |        |                    |
| 34 |       |                     |        |                    |
| 35 |       |                     |        |                    |
| 36 |       |                     |        |                    |
| 37 |       |                     |        |                    |
| 38 |       |                     |        |                    |
| 39 |       |                     |        |                    |
| 40 |       |                     |        |                    |
| 41 |       |                     |        |                    |
| 42 |       |                     |        |                    |
| 43 |       |                     |        |                    |
| 44 |       |                     |        |                    |
| 45 |       |                     |        |                    |
| 46 |       |                     |        |                    |

For peer review only



**Table S10.** Univariable and multivariable logistic regressions for antihypertensive drugs taking among cardiologists with hypertension

| Variable        | Univariable logistic regression |        | Multivariable logistic regression |        |
|-----------------|---------------------------------|--------|-----------------------------------|--------|
|                 | OR (95%CI)                      | P      | OR (95%CI)                        | P      |
| Age (years)     |                                 |        |                                   |        |
| 20-29           | Reference                       |        | Reference                         |        |
| 30-39           | 1.514 (1.289,1.779)             | <0.001 | 1.433 (1.055,1.945)               | 0.021  |
| 40-49           | 2.375 (2.019,2.794)             | <0.001 | 1.989 (1.428,2.771)               | <0.001 |
| 50-59           | 2.881 (2.387,3.478)             | <0.001 | 2.282 (1.599,3.257)               | <0.001 |
| ≥60             | 3.775 (2.854,4.992)             | <0.001 | 2.677 (1.754,4.086)               | <0.001 |
| Gender          |                                 |        |                                   |        |
| Male            | Reference                       |        | Reference                         |        |
| Female          | 0.802 (0.723,0.889)             | <0.001 | 1.2 (1.059,1.359)                 | 0.004  |
| Academic degree |                                 |        |                                   |        |
| Junior college  | Reference                       |        | Reference                         |        |
| Bachelor        | 1.565 (0.905,2.708)             | 0.109  | 1.025 (0.553,1.901)               | 0.938  |

|    |                           |                     |        |                     |       |
|----|---------------------------|---------------------|--------|---------------------|-------|
| 1  |                           |                     |        |                     |       |
| 2  |                           |                     |        |                     |       |
| 3  |                           |                     |        |                     |       |
| 4  |                           |                     |        |                     |       |
| 5  | Master                    | 1.506 (0.87,2.607)  | 0.144  | 0.915 (0.491,1.705) | 0.780 |
| 6  |                           |                     |        |                     |       |
| 7  | Doctor                    | 1.809 (1.033,3.168) | 0.038  | 0.93 (0.492,1.757)  | 0.822 |
| 8  |                           |                     |        |                     |       |
| 9  | Post-doctor               | 2.46 (1.298,4.659)  | 0.006  | 1.092 (0.534,2.235) | 0.809 |
| 10 |                           |                     |        |                     |       |
| 11 | Others                    | 1.057 (0.596,1.876) | 0.849  | 1.428 (0.729,2.8)   | 0.299 |
| 12 |                           |                     |        |                     |       |
| 13 |                           |                     |        |                     |       |
| 14 | Hospital level            |                     |        |                     |       |
| 15 |                           |                     |        |                     |       |
| 16 | Primary                   | Reference           |        |                     |       |
| 17 |                           |                     |        |                     |       |
| 18 | Secondary                 | 1.302 (0.888,1.909) | 0.177  |                     |       |
| 19 |                           |                     |        |                     |       |
| 20 | Tertiary                  | 1.142 (0.781,1.669) | 0.495  |                     |       |
| 21 |                           |                     |        |                     |       |
| 22 | Others                    | 1.451 (0.794,2.649) | 0.226  |                     |       |
| 23 |                           |                     |        |                     |       |
| 24 |                           |                     |        |                     |       |
| 25 | Professional title        |                     |        |                     |       |
| 26 |                           |                     |        |                     |       |
| 27 | General physician         | Reference           |        | Reference           |       |
| 28 |                           |                     |        |                     |       |
| 29 | Healer                    | 1.981 (1.342,2.925) | 0.001  | 1.233 (0.765,1.989) | 0.390 |
| 30 |                           |                     |        |                     |       |
| 31 | Resident physician        | 2.014 (1.486,2.73)  | <0.001 | 1.084 (0.736,1.596) | 0.684 |
| 32 |                           |                     |        |                     |       |
| 33 | Attending physician       | 1.783 (1.488,2.137) | <0.001 | 1.165 (0.878,1.546) | 0.290 |
| 34 |                           |                     |        |                     |       |
| 35 | Associate chief physician | 2.523 (2.074,3.068) | <0.001 | 1.24 (0.898,1.711)  | 0.192 |
| 36 |                           |                     |        |                     |       |
| 37 |                           |                     |        |                     |       |
| 38 |                           |                     |        |                     |       |
| 39 |                           |                     |        |                     |       |
| 40 |                           |                     |        |                     |       |
| 41 |                           |                     |        |                     |       |
| 42 |                           |                     |        |                     |       |
| 43 |                           |                     |        |                     |       |
| 44 |                           |                     |        |                     |       |
| 45 |                           |                     |        |                     |       |
| 46 |                           |                     |        |                     |       |

|    |                          |                     |        |                     |        |
|----|--------------------------|---------------------|--------|---------------------|--------|
| 1  |                          |                     |        |                     |        |
| 2  |                          |                     |        |                     |        |
| 3  |                          |                     |        |                     |        |
| 4  | Chief physician          | 3.185 (2.569,3.948) | <0.001 | 1.407 (0.993,1.992) | 0.055  |
| 5  |                          |                     |        |                     |        |
| 6  | Others                   | 1.161 (0.917,1.469) | 0.215  | 0.831 (0.562,1.23)  | 0.356  |
| 7  |                          |                     |        |                     |        |
| 8  |                          |                     |        |                     |        |
| 9  | BMI (kg/m <sup>2</sup> ) |                     |        |                     |        |
| 10 |                          |                     |        |                     |        |
| 11 | <18.5                    | 0.628 (0.464,0.852) | 0.003  | 0.78 (0.565,1.078)  | 0.132  |
| 12 |                          |                     |        |                     |        |
| 13 | 18.5-23.9                | Reference           |        | Reference           |        |
| 14 |                          |                     |        |                     |        |
| 15 | ≥24                      | 1.409 (1.272,1.561) | <0.001 | 1.157 (1.031,1.299) | 0.013  |
| 16 |                          |                     |        |                     |        |
| 17 |                          |                     |        |                     |        |
| 18 | Smoking                  |                     |        |                     |        |
| 19 |                          |                     |        |                     |        |
| 20 | Frequent                 | Reference           |        | Reference           |        |
| 21 |                          |                     |        |                     |        |
| 22 | Infrequent               | 0.446 (0.397,0.502) | <0.001 | 0.502 (0.44,0.572)  | <0.001 |
| 23 |                          |                     |        |                     |        |
| 24 | Never                    | 0.335 (0.293,0.383) | <0.001 | 0.374 (0.322,0.434) | <0.001 |
| 25 |                          |                     |        |                     |        |
| 26 |                          |                     |        |                     |        |
| 27 | Family history           |                     |        |                     |        |
| 28 |                          |                     |        |                     |        |
| 29 | No                       | Reference           |        | Reference           |        |
| 30 |                          |                     |        |                     |        |
| 31 | Yes                      | 0.485 (0.437,0.539) | <0.001 | 1.4 (1.247,1.571)   | <0.001 |
| 32 |                          |                     |        |                     |        |
| 33 |                          |                     |        |                     |        |
| 34 | Comorbidity              |                     |        |                     |        |
| 35 |                          |                     |        |                     |        |
| 36 | No                       | Reference           |        | Reference           |        |
| 37 |                          |                     |        |                     |        |
| 38 |                          |                     |        |                     |        |
| 39 |                          |                     |        |                     |        |
| 40 |                          |                     |        |                     |        |
| 41 |                          |                     |        |                     |        |
| 42 |                          |                     |        |                     |        |
| 43 |                          |                     |        |                     |        |
| 44 |                          |                     |        |                     |        |
| 45 |                          |                     |        |                     |        |
| 46 |                          |                     |        |                     |        |

|    |     |                     |        |                     |
|----|-----|---------------------|--------|---------------------|
| 1  |     |                     |        |                     |
| 2  |     |                     |        |                     |
| 3  |     |                     |        |                     |
| 4  |     |                     |        |                     |
| 5  | Yes | 3.185 (2.854,3.555) | <0.001 | 2.646 (2.351,2.977) |
| 6  |     |                     |        |                     |
| 7  |     |                     |        |                     |
| 8  |     |                     |        |                     |
| 9  |     |                     |        |                     |
| 10 |     |                     |        |                     |
| 11 |     |                     |        |                     |
| 12 |     |                     |        |                     |
| 13 |     |                     |        |                     |
| 14 |     |                     |        |                     |
| 15 |     |                     |        |                     |
| 16 |     |                     |        |                     |
| 17 |     |                     |        |                     |
| 18 |     |                     |        |                     |
| 19 |     |                     |        |                     |
| 20 |     |                     |        |                     |
| 21 |     |                     |        |                     |
| 22 |     |                     |        |                     |
| 23 |     |                     |        |                     |
| 24 |     |                     |        |                     |
| 25 |     |                     |        |                     |
| 26 |     |                     |        |                     |
| 27 |     |                     |        |                     |
| 28 |     |                     |        |                     |
| 29 |     |                     |        |                     |
| 30 |     |                     |        |                     |
| 31 |     |                     |        |                     |
| 32 |     |                     |        |                     |
| 33 |     |                     |        |                     |
| 34 |     |                     |        |                     |
| 35 |     |                     |        |                     |
| 36 |     |                     |        |                     |
| 37 |     |                     |        |                     |
| 38 |     |                     |        |                     |
| 39 |     |                     |        |                     |
| 40 |     |                     |        |                     |
| 41 |     |                     |        |                     |
| 42 |     |                     |        |                     |
| 43 |     |                     |        |                     |
| 44 |     |                     |        |                     |
| 45 |     |                     |        |                     |
| 46 |     |                     |        |                     |

For peer review only

**Table S11.** Univariable and multivariable logistic regressions for reaching the target blood pressure among cardiologists taking antihypertensive drugs

| Variable        | Univariable logistic regression |        | Multivariable logistic regression |       |
|-----------------|---------------------------------|--------|-----------------------------------|-------|
|                 | OR (95%CI)                      | P      | OR (95%CI)                        | P     |
| Age (years)     |                                 |        |                                   |       |
| 20-29           | Reference                       |        | Reference                         |       |
| 30-39           | 0.824 (0.62,1.096)              | 0.183  | 0.689 (0.418,1.138)               | 0.146 |
| 40-49           | 0.761 (0.574,1.009)             | 0.058  | 0.667 (0.391,1.138)               | 0.137 |
| 50-59           | 0.518 (0.375,0.716)             | <0.001 | 0.465 (0.262,0.825)               | 0.009 |
| ≥60             | 0.655 (0.424,1.012)             | 0.057  | 0.549 (0.286,1.055)               | 0.072 |
| Gender          |                                 |        |                                   |       |
| Male            | Reference                       |        | Reference                         |       |
| Female          | 1.204 (1.012,1.432)             | 0.036  | 1.081 (0.896,1.304)               | 0.415 |
| Academic degree |                                 |        |                                   |       |
| Junior college  | Reference                       |        |                                   |       |

|                     |                     |       |                     |       |
|---------------------|---------------------|-------|---------------------|-------|
| Bachelor            | 0.457 (0.172,1.211) | 0.115 |                     |       |
| Master              | 0.483 (0.182,1.282) | 0.144 |                     |       |
| Doctor              | 0.484 (0.179,1.306) | 0.152 |                     |       |
| Post-doctor         | 0.591 (0.198,1.762) | 0.345 |                     |       |
| Others              | 0.791 (0.286,2.192) | 0.652 |                     |       |
| Hospital level      |                     |       |                     |       |
| Primary             | Reference           |       | Reference           |       |
| Secondary           | 2.845 (1.29,6.275)  | 0.010 | 2.878 (1.287,6.438) | 0.01  |
| Tertiary            | 2.573 (1.171,5.655) | 0.019 | 2.558 (1.147,5.704) | 0.022 |
| Others              | 2.578 (0.863,7.701) | 0.090 | 2.179 (0.714,6.646) | 0.171 |
| Professional title  |                     |       |                     |       |
| General physician   | Reference           |       | Reference           |       |
| Healer              | 1.308 (0.681,2.514) | 0.420 | 1.697 (0.8,3.603)   | 0.168 |
| Resident physician  | 1.956 (1.167,3.28)  | 0.011 | 2.768 (1.467,5.225) | 0.002 |
| Attending physician | 1.187 (0.856,1.646) | 0.304 | 1.585 (0.982,2.558) | 0.059 |

|    |                           |                     |        |                     |        |
|----|---------------------------|---------------------|--------|---------------------|--------|
| 1  |                           |                     |        |                     |        |
| 2  |                           |                     |        |                     |        |
| 3  |                           |                     |        |                     |        |
| 4  |                           |                     |        |                     |        |
| 5  | Associate chief physician | 0.845 (0.596,1.196) | 0.341  | 1.271 (0.747,2.16)  | 0.376  |
| 6  |                           |                     |        |                     |        |
| 7  | Chief physician           | 0.947 (0.655,1.369) | 0.772  | 1.623 (0.928,2.837) | 0.089  |
| 8  |                           |                     |        |                     |        |
| 9  | Others                    | 1.65 (1.081,2.519)  | 0.020  | 1.599 (1.036,2.469) | 0.034  |
| 10 |                           |                     |        |                     |        |
| 11 | BMI (kg/m <sup>2</sup> )  |                     |        |                     |        |
| 12 |                           |                     |        |                     |        |
| 13 | <18.5                     | 0.973 (0.566,1.673) | 0.922  | 0.872 (0.5,1.521)   | 0.629  |
| 14 |                           |                     |        |                     |        |
| 15 | 18.5-23.9                 | Reference           |        | Reference           |        |
| 16 |                           |                     |        |                     |        |
| 17 | ≥24                       | 0.621 (0.524,0.738) | <0.001 | 0.657 (0.548,0.787) | <0.001 |
| 18 |                           |                     |        |                     |        |
| 19 |                           |                     |        |                     |        |
| 20 | Smoking                   |                     |        |                     |        |
| 21 |                           |                     |        |                     |        |
| 22 | Frequent                  | Reference           |        |                     |        |
| 23 |                           |                     |        |                     |        |
| 24 | Infrequent                | 0.936 (0.777,1.128) | 0.489  |                     |        |
| 25 |                           |                     |        |                     |        |
| 26 | Never                     | 1.022 (0.819,1.275) | 0.848  |                     |        |
| 27 |                           |                     |        |                     |        |
| 28 | Family history            |                     |        |                     |        |
| 29 |                           |                     |        |                     |        |
| 30 | No                        | Reference           |        |                     |        |
| 31 |                           |                     |        |                     |        |
| 32 | Yes                       | 1.445 (1.219,1.713) | <0.001 | 0.746 (0.624,0.891) | 0.001  |
| 33 |                           |                     |        |                     |        |
| 34 | Comorbidity               |                     |        |                     |        |
| 35 |                           |                     |        |                     |        |
| 36 |                           |                     |        |                     |        |
| 37 |                           |                     |        |                     |        |
| 38 |                           |                     |        |                     |        |
| 39 |                           |                     |        |                     |        |
| 40 |                           |                     |        |                     |        |
| 41 |                           |                     |        |                     |        |
| 42 |                           |                     |        |                     |        |
| 43 |                           |                     |        |                     |        |
| 44 |                           |                     |        |                     |        |
| 45 |                           |                     |        |                     |        |
| 46 |                           |                     |        |                     |        |

|     |                    |       |                    |       |
|-----|--------------------|-------|--------------------|-------|
| No  | Reference          |       |                    |       |
| Yes | 0.811 (0.685,0.96) | 0.015 | 0.811 (0.679,0.97) | 0.022 |

---

For peer review only



**CCHS****QUESTIONNAIRE**

China Cardiologist Heart Study

**FORM**

**INSTRUCTIONS:** This collection of information is estimated to average **10** minutes. Name and contact information must be entered above. Please enter the number so that the last digit appears in the rightmost box. Enter leading zeros where necessary to fill all boxes. For "multiple choice" and "yes/no" type questions, circle the letter corresponding to the most appropriate response. If a letter is circled incorrectly, mark through it with an "X" and circle the correct response.

**CCHS Center use only**Sequence Number 

1. Name: \_\_\_\_\_

2. Date of birth: / (yyyy/mm)

3. Contact phone number: \_\_\_\_\_

4. Employer: Hospital name, district/county, city, province/municipality \_\_\_\_\_

**A. Personal information**1. Hospital level: 

2. Professional title: \_\_\_\_\_

3. Academic degree: \_\_\_\_\_

4. Area of expertise (multiple choices available):

- |                                                                  |                                                             |
|------------------------------------------------------------------|-------------------------------------------------------------|
| <input type="radio"/> Atherosclerosis and coronary heart disease | <input type="radio"/> Hypertension                          |
| <input type="radio"/> Arrhythmia and electrophysiology           | <input type="radio"/> Blood lipid metabolism                |
| <input type="radio"/> Congenital heart disease                   | <input type="radio"/> Heart failure                         |
| <input type="radio"/> Pulmonary vascular disease                 | <input type="radio"/> Structural heart disease              |
| <input type="radio"/> Female cardiovascular disease              | <input type="radio"/> Senile cardiovascular disease         |
| <input type="radio"/> Basic-clinical combination                 | <input type="radio"/> Cardiovascular imaging                |
| <input type="radio"/> Interventional cardiology                  | <input type="radio"/> Cardiac intensive care and monitoring |
| <input type="radio"/> Others                                     |                                                             |

**B. Survey information**1. Gender:  Male  Female2. Height: .  cm3. Weight: .  kg

1  
2  
3  
4. Are you currently taking the following medications? (multiple choices available)

- 4       ○ Antihypertensive drugs
- 5       ○ Lipid-lowering drugs
- 6       ○ Antidiabetic drugs
- 7       ○ None

8  
9  
10  
11 5. Do you have any of the following clinical conditions? (multiple choices available)

- 12       ○ None
- 13       ○ Coronary heart disease
- 14       ○ Heart failure
- 15       ○ Diabetes
- 16       ○ Chronic kidney disease
- 17       ○ Peripheral vascular disease
- 18       ○ Stroke/transient ischemic attack

19  
20  
21  
22  
23  
24  
25 6. Did you smoke  $\geq 1$  cigarette per day in the past 3 months?

- 26       ○ Yes
- 27       ○ No
- 28       ○ Never smoked

29  
30  
31  
32 7. Do you have a first-degree male relative who suffered from a cardiovascular disease at <55  
33 years of age or a first-degree female relative who suffered from a cardiovascular disease at <65  
34 years of age?

- 35       ○ No
- 36       ○ Yes

37  
38  
39  
40  
41  
42 **C. Blood Pressure** (Please record the data in the last 2 weeks, If don't know, please fill in 999)

43 1. Average sitting systolic blood pressure: mmHg

44 2. Average sitting diastolic blood pressure: mmHg

45 3. Average heart rate: bpm

46  
47  
48  
49  
50  
51 **D. Laboratory** (Please record the data of the most recent results within a year, If don't know,  
52 please fill in 999)

53 1. Fasting blood glucose: .mmol/L

54 2. Total cholesterol (TC): .mmol/L or .mg/dL

55 3. Low density lipoprotein-cholesterol (LDL-C): .mmol/L or .mg/dL

56 4. High density lipoprotein-cholesterol (HDL-C): .mmol/L or .mg/dL

1  
2  
3  
4  
5  
6  
7  
8  
9  
10  
11  
12  
13  
14  
15  
16  
17  
18  
19  
20  
21  
22  
23  
24  
25  
26  
27  
28  
29  
30  
31  
32  
33  
34  
35  
36  
37  
38  
39  
40  
41  
42  
43  
44  
45  
46  
47  
48  
49  
50  
51  
52  
53  
54  
55  
56  
57  
58  
59  
60

5. Triglyceride (TG):   .  mmol/L or    .  mg/dL

**Thank you very much for your help!**

For peer review only

**STROBE Statement**

Checklist of items that should be included in reports of observational studies

| Section/Topic                                                                                      | Item No | Recommendation                                                                                                                                                                             | Reported on Page No |
|----------------------------------------------------------------------------------------------------|---------|--------------------------------------------------------------------------------------------------------------------------------------------------------------------------------------------|---------------------|
| <b>Title and abstract</b>                                                                          | 1       | (a) Indicate the study's design with a commonly used term in the title or the abstract                                                                                                     | 1                   |
|                                                                                                    |         | (b) Provide in the abstract an informative and balanced summary of what was done and what was found                                                                                        | 2-3                 |
| <b>Introduction</b>                                                                                |         |                                                                                                                                                                                            |                     |
| Background/rationale                                                                               | 2       | Explain the scientific background and rationale for the investigation being reported                                                                                                       | 4-5                 |
| Objectives                                                                                         | 3       | State specific objectives, including any prespecified hypotheses                                                                                                                           | 5                   |
| <b>Methods</b>                                                                                     |         |                                                                                                                                                                                            |                     |
| Study design                                                                                       | 4       | Present key elements of study design early in the paper                                                                                                                                    | 5                   |
| Setting                                                                                            | 5       | Describe the setting, locations, and relevant dates, including periods of recruitment, exposure, follow-up, and data collection                                                            | 5                   |
| Participants                                                                                       | 6       | (a) <i>Cohort study</i> —Give the eligibility criteria, and the sources and methods of selection of participants. Describe methods of follow-up                                            | 5                   |
|                                                                                                    |         | <i>Case-control study</i> —Give the eligibility criteria, and the sources and methods of case ascertainment and control selection. Give the rationale for the choice of cases and controls |                     |
|                                                                                                    |         | <i>Cross-sectional study</i> —Give the eligibility criteria, and the sources and methods of selection of participants                                                                      |                     |
| Variables                                                                                          | 7       | (b) <i>Cohort study</i> —For matched studies, give matching criteria and number of exposed and unexposed                                                                                   | 5                   |
|                                                                                                    |         | <i>Case-control study</i> —For matched studies, give matching criteria and the number of controls per case                                                                                 |                     |
| Data sources/measurement                                                                           | 8*      | Clearly define all outcomes, exposures, predictors, potential confounders, and effect modifiers. Give diagnostic criteria, if applicable                                                   | 5                   |
| Bias                                                                                               | 9       | For each variable of interest, give sources of data and details of methods of assessment (measurement). Describe comparability of assessment methods if there is more than one group       | 6                   |
| Study size                                                                                         | 10      | Describe any efforts to address potential sources of bias                                                                                                                                  | 6                   |
| Quantitative variables                                                                             | 11      | Explain how the study size was arrived at                                                                                                                                                  | 6                   |
| Statistical methods                                                                                | 12      | Explain how quantitative variables were handled in the analyses. If applicable, describe which groupings were chosen and why                                                               | 6                   |
|                                                                                                    |         | (a) Describe all statistical methods, including those used to control for confounding                                                                                                      | 7                   |
|                                                                                                    |         | (b) Describe any methods used to examine subgroups and interactions                                                                                                                        | 7                   |
|                                                                                                    |         | (c) Explain how missing data were addressed                                                                                                                                                | 7                   |
|                                                                                                    |         | (d) <i>Cohort study</i> —If applicable, explain how loss to follow-up was addressed                                                                                                        | 7                   |
| <i>Case-control study</i> —If applicable, explain how matching of cases and controls was addressed |         |                                                                                                                                                                                            |                     |
|                                                                                                    |         | <i>Cross-sectional study</i> —If applicable, describe analytical methods taking account of sampling strategy                                                                               | 7                   |
|                                                                                                    |         | (e) Describe any sensitivity analyses                                                                                                                                                      | 7                   |

| Section/Topic            | Item No | Recommendation                                                                                                                                                                                               | Reported on Page No |
|--------------------------|---------|--------------------------------------------------------------------------------------------------------------------------------------------------------------------------------------------------------------|---------------------|
| <b>Results</b>           |         |                                                                                                                                                                                                              |                     |
| Participants             | 13*     | (a) Report numbers of individuals at each stage of study—eg numbers potentially eligible, examined for eligibility, confirmed eligible, included in the study, completing follow-up, and analysed            | 8                   |
|                          |         | (b) Give reasons for non-participation at each stage                                                                                                                                                         |                     |
|                          |         | (c) Consider use of a flow diagram                                                                                                                                                                           |                     |
| Descriptive data         | 14*     | (a) Give characteristics of study participants (eg demographic, clinical, social) and information on exposures and potential confounders                                                                     | 8                   |
|                          |         | (b) Indicate number of participants with missing data for each variable of interest                                                                                                                          |                     |
|                          |         | (c) <i>Cohort study</i> —Summarise follow-up time (eg, average and total amount)                                                                                                                             |                     |
| Outcome data             | 15*     | <i>Cohort study</i> —Report numbers of outcome events or summary measures over time                                                                                                                          |                     |
|                          |         | <i>Case-control study</i> —Report numbers in each exposure category, or summary measures of exposure                                                                                                         |                     |
|                          |         | <i>Cross-sectional study</i> —Report numbers of outcome events or summary measures                                                                                                                           | 9-11                |
| Main results             | 16      | (a) Give unadjusted estimates and, if applicable, confounder-adjusted estimates and their precision (eg, 95% confidence interval). Make clear which confounders were adjusted for and why they were included | 9-11                |
|                          |         | (b) Report category boundaries when continuous variables were categorized                                                                                                                                    |                     |
|                          |         | (c) If relevant, consider translating estimates of relative risk into absolute risk for a meaningful time period                                                                                             |                     |
| Other analyses           | 17      | Report other analyses done—eg analyses of subgroups and interactions, and sensitivity analyses                                                                                                               |                     |
| <b>Discussion</b>        |         |                                                                                                                                                                                                              |                     |
| Key results              | 18      | Summarise key results with reference to study objectives                                                                                                                                                     | 11-14               |
| Limitations              | 19      | Discuss limitations of the study, taking into account sources of potential bias or imprecision. Discuss both direction and magnitude of any potential bias                                                   | 14                  |
| Interpretation           | 20      | Give a cautious overall interpretation of results considering objectives, limitations, multiplicity of analyses, results from similar studies, and other relevant evidence                                   | 14-15               |
| Generalisability         | 21      | Discuss the generalisability (external validity) of the study results                                                                                                                                        | 14-15               |
| <b>Other Information</b> |         |                                                                                                                                                                                                              |                     |
| Funding                  | 22      | Give the source of funding and the role of the funders for the present study and, if applicable, for the original study on which the present article is based                                                | 15                  |

\*Give information separately for cases and controls in case-control studies and, if applicable, for exposed and unexposed groups in cohort and cross-sectional studies.

**Note:** An Explanation and Elaboration article discusses each checklist item and gives methodological background and published examples of transparent reporting. The STROBE checklist is best used in conjunction with this article (freely available on the Web sites of PLoS Medicine at <http://www.plosmedicine.org/>, Annals of Internal Medicine at <http://www.annals.org/>, and Epidemiology at <http://www.epidem.com/>). Information on the STROBE Initiative is available at [www.strobe-statement.org](http://www.strobe-statement.org).
